# **Mucosal vaccination with CysVac2/Advax induces Th17 lung-resident CD4<sup>+</sup> T cells and interleukin-17-dependant protection against *Mycobacterium tuberculosis* infection**

Claudio Counoupas<sup>1,2,3\*</sup>, Kia Ferrell<sup>1,2</sup>, Anneliese Ashhurst<sup>1,3</sup>, Nayan Bhattacharyya<sup>1,2,3</sup>, Gayathri Nagalingam<sup>1,3</sup>, Carl G. Feng<sup>1,2</sup>, Nikolai Petrovsky<sup>4</sup>, Warwick J. Britton<sup>1,3</sup>, James A. Triccas<sup>1,2,3,5\*</sup>

<sup>1</sup>Discipline of Infectious Diseases and Immunology, Faculty of Medicine and Health, The University of Sydney, Camperdown, NSW, Australia

<sup>2</sup>Charles Perkins Centre, The University of Sydney, Camperdown, NSW, Australia

<sup>3</sup>Tuberculosis Research Program Centenary Institute, The University of Sydney, Camperdown, NSW, Australia

<sup>4</sup>Vaxine Pty Ltd, 11 Walkley Avenue, Warradale and Flinders University, Adelaide, Australia

<sup>5</sup>Marie Bashir Institute for Infectious Diseases and Biosecurity, The University of Sydney, Camperdown, NSW, Australia

\*Corresponding authors

E-mail: [claudio.counoupas@sydney.edu.au](mailto:claudio.counoupas@sydney.edu.au) (CC)

E-mail: [jamie.triccas@sydney.edu.au](mailto:jamie.triccas@sydney.edu.au) (JAT)

## Abstract

The development of effective vaccines against bacterial lung infections requires the induction of protective, pathogen-specific immune responses without deleterious inflammation within the pulmonary environment. Here, we made use of a polysaccharide-adjuvanted vaccine approach to elicit resident pulmonary T cells to protect against aerosol *Mycobacterium tuberculosis* infection. Intratracheal administration of *M. tuberculosis* fusion protein CysVac2 and the delta-inulin adjuvant Advax™ (formulated with a TLR9 agonist) provided superior protection against aerosol *M. tuberculosis* infection in mice, compared to parenteral delivery. Surprisingly, removal of the TLR9 agonist did not impact vaccine protection despite a reduction in cytokine-secreting T cell subsets, particularly CD4<sup>+</sup> IFN-γ<sup>+</sup>IL-2<sup>+</sup>TNF<sup>+</sup> multifunctional T cells. CysVac2/Advax-mediated protection was associated with the induction of lung-resident, antigen-specific memory CD4<sup>+</sup> T cells that expressed IL-17 and RORγt, the master transcriptional regulator of Th17 differentiation. IL-17 was identified as a key mediator of vaccine efficacy, with blocking of IL-17 during *M. tuberculosis* challenge reducing phagocyte influx, suppressing priming of pathogen-specific CD4<sup>+</sup> T cells in local lymph nodes and ablating vaccine-induced protection. These findings suggest that tuberculosis vaccines such as CysVac2/Advax that are capable of eliciting Th17 lung-resident memory T cells are promising candidates for progression to human trials.

## 45 **Author summary**

46 *Mycobacterium tuberculosis*, the causative agent of tuberculosis (TB), kills more individuals each  
 47 year than any other single pathogen and a more effective vaccine is critical for global control of the  
 48 disease. TB is an airborne disease, and the only available vaccine, BCG, administered intradermally,  
 49 is unreliable in protecting against the pulmonary form of the disease. Vaccination in the lung would  
 50 be a rational way of inducing a local memory immune response to TB, however vaccine platforms  
 51 would need to deliver antigens to delicate mucosal surfaces without inducing deleterious  
 52 inflammatory responses. In this report we used pulmonary delivery of TB antigens combined with  
 53 [non-reactogenic polysaccharide adjuvants](#) to induce protection against TB lung infection in mice. The  
 54 vaccine formulation induced high levels of T cells that resided in the lung and notably expressed the  
 55 cytokine IL-17. Removal of IL-17 limited the influx of immune cells recruited to the lung and  
 56 completely ablated protection afforded by the vaccine. This study provides new insights into  
 57 mechanisms of protection against *M. tuberculosis* and provides a promising candidate to protect  
 58 against TB in humans.

## Introduction

Tuberculosis (TB) remains a major cause of morbidity and mortality worldwide, with 10 million new cases and 1.7 million deaths per year[1]. *Mycobacterium bovis* bacillus Calmette-Guérin (BCG) is currently the only licensed vaccine against TB, however its efficacy varies greatly, especially against the adult pulmonary form of the disease[2]. The 2015 WHO End TB Strategy identified the development of a more effective and easily administered vaccine for controlling TB and halting the global epidemic[3]. In recent decades, extensive research has resulted in many new TB vaccine candidate, 14 of which are currently in human vaccine trials and are reviewed in detail elsewhere[4]. Recently, a Phase IIb clinical trial of the fusion protein vaccine M72/AS01<sub>E</sub> showed protective efficacy of 50% in *M. tuberculosis*-infected adults after 3 years [5, 6]. Although promising, vaccines with higher efficacy are considered necessary to reduce TB incidence to the targets outlined in the End TB Strategy objectives[3].

One of the major limitations of current vaccination strategies is that the administration route may not be optimal for the induction of immunity at the site of pathogen entry, i.e. the lung. Pulmonary vaccine delivery has been hindered by the fact that most adjuvants are either unable to induce sufficient mucosal immunity or are too toxic to be administered to the lung[7]. However, recent evidence supports the idea that mucosal vaccination may provide superior protection against respiratory *M. tuberculosis* infection over parenteral vaccination. For example, lung-resident CD4<sup>+</sup> memory T cells (T<sub>RM</sub>) induced after pulmonary vaccination with a recombinant influenza virus expressing *M. tuberculosis* antigens provided protection in the lung in the absence of circulating memory cells[8]. T<sub>RM</sub> have also been proposed as the possible mechanism of protection in macaques that demonstrate sterilizing immunity after intravenous vaccination with BCG and subsequent *M. tuberculosis* infection [9]. When administered through the mucosal route, BCG induced increased protection compared to the intradermal immunization, which was linked to lung T<sub>RM</sub> and Th17 polarization of the CD4<sup>+</sup> T cells[10]. Th17 responses have been associated with the influx of neutrophils with

bactericidal activity[11] and increased CD4<sup>+</sup> T cell recruitment to the lung after *M. tuberculosis* infection[12]. Vaccines inducing high levels of pulmonary IL-17 have demonstrated efficacy against *M. tuberculosis* in different animal models[13, 14] although balancing the protective and pathogenic roles of IL-17 in the lung is a critical consideration[15].

In this study we sought to determine if the candidate TB vaccine, CysVac2/Advax[16], is effective as a mucosal vaccine to protect against *M. tuberculosis*. CysVac2 is a fusion protein of two *M. tuberculosis* antigens; the immunodominant Ag85B and CysD, a component of the sulfur assimilation pathway that is overexpressed in chronic stages of infection. [17] Advax is a particulate polysaccharide adjuvant with a low inflammatory profile that has proven to be safe and a strong inducer of vaccine immunogenicity in humans, thus making it an ideal candidate for mucosal administration[18][19]. Notably, it was recently shown to provide safe and effective enhancement of influenza vaccine immunity when administered via the intrapulmonary route in different animal models[20, 21].

We report here that intrapulmonary administration of CysVac2/Advax induced greater protection in mice than parenterally administered vaccine, with the vaccine promoting the accumulation of antigen-specific, IL-17-secreting CD4<sup>+</sup> T<sub>RM</sub> in the lungs. Furthermore, IL-17 was essential for the protective efficacy afforded by intrapulmonary CysVac2/Advax vaccine, thus defining a crucial role for this cytokine in vaccine-mediated control of TB.

## Results

### Pulmonary administration of CysVac2/Advax<sup>CpG</sup> provides superior protection against *M. tuberculosis* challenge than parenteral vaccination

Previous studies of intramuscular (i.m.) vaccination of mice with CysVac2/Advax<sup>CpG</sup> demonstrated substantially enhanced systemic CD4<sup>+</sup> T cell responses composed of multifunctional Th1 polarized cells, which correlated with protection against aerosol *M. tuberculosis* infection[16]. In this study, we evaluated if delivery to the lung by intratracheal (i.t.) instillation of this vaccine candidate could improve the level of protection induced by this vaccine. Mice were vaccinated by either the i.t. or i.m. routes with CysVac2/Advax<sup>CpG</sup> 3 times, 2 weeks apart (Fig 1a). When the vaccine-specific T cell response was examined in the blood prior to *M. tuberculosis* challenge, a higher level of circulating polyfunctional CD4<sup>+</sup> T cells expressing IFN- $\gamma$  were present after i.m. vaccination (Fig 1b, S1a Fig), with the most prominent phenotype identified as multi-cytokine secreting CD44<sup>+</sup> CD4<sup>+</sup> T cells (Fig 1c). After i.t. vaccination with CysVac2/Advax<sup>CpG</sup>, PBMC-derived CD4<sup>+</sup> T cell expressing either IL-2, TNF or IL-17 were more prominent when compared to the i.m. route (Fig 1b). Both vaccination regimens induced similar proportions of T-bet expression in circulating CD4<sup>+</sup> T cells, however i.t. vaccination induced a higher proportion of cells expressing ROR $\gamma$ T (Fig 1d).

The pattern of CD4<sup>+</sup> T cells immune responses pre-*M. tuberculosis* challenge was compared to that after *M. tuberculosis* infection. In i.m. vaccinated mice, the greatest frequency of CD4<sup>+</sup> T cells observed were those secreting IFN- $\gamma$  or TNF (Fig 1e) and this was dominated by cells with a polyfunctional Th1 responses (IFN- $\gamma$ <sup>+</sup>IL-2<sup>+</sup>TNF<sup>+</sup>, Fig 1f). I.t. vaccination with CysVac2/Advax<sup>CpG</sup> resulted in a high frequency of CD4<sup>+</sup> T cells secreting either IL-17 or TNF (Fig 1e) or both cytokines (S1b Fig); these T cell subsets were not observed after i.m. vaccination (Fig 1e, S1 Fig). Further, the frequency of CD4<sup>+</sup> T cells expressing ROR $\gamma$ T was significantly enhanced after i.t. vaccination compared to unvaccinated or i.m. vaccinated mice (Fig 1g). Therefore i.t. vaccination of mice with

CysVac2/Advax<sup>CpG</sup> results in a Th17-polarized T cell response post-*M. tuberculosis* exposure, which was not observed after i.m. immunization.

Considering the differential pattern of immune responses induced by varying the route of administration of CysVac2/Advax<sup>CpG</sup>, we next determined if this had an impact on protective efficacy. I.t. vaccinated mice challenged with low dose aerosol *M. tuberculosis*, demonstrated significantly enhanced lung protection when compared to i.m.-vaccinated or unvaccinated mice (Fig 1h). A similar result was observed in the spleen, suggesting that i.t. vaccination might improve protection against disseminated infection (Fig 1i). Taken together, these results demonstrate that pulmonary vaccination with CysVac2/Advax<sup>CpG</sup> induces superior protection compared to i.m. vaccination and this is associated with an enhanced generation of Th17 cells in the circulation and in the lung.

#### **CpG is dispensable for protection generated by pulmonary vaccination with CysVac2/Advax**

CpG oligonucleotides are TLR9 agonists that help drive Th1 immune responses[22]. While the CpG component was shown to be important to the protection obtained after CysVac2 i.m. immunization, we were interested whether a simplified formulation of Advax without the CpG component would still generate protective pulmonary immunity. CysVac2/Advax or CysVac2/Advax<sup>CpG</sup> were delivered by the i.t. route, and the mice challenged with aerosol *M. tuberculosis*. Both vaccines resulted in the generation of IL-17-producing CD4<sup>+</sup> T cells following antigen restimulation *ex vivo* (Fig 2A), however all inflammatory cytokines (IFN- $\gamma$ , IL-17, TNF) were reduced in Advax-immunized as compared to Advax<sup>CpG</sup>-vaccinated mice (Fig 2a). Strikingly, the removal of the CpG component resulted in the loss of multifunctional CD4<sup>+</sup> T cells with a triple cytokine-secreting profile (IFN- $\gamma$ <sup>+</sup>IL-2<sup>+</sup>TNF<sup>+</sup>) (Fig 2b). However, both vaccinated groups displayed equivalent expression of the transcription factors T-bet or ROR $\gamma$ T (Fig 2c) and similar protection against *M. tuberculosis* in the lungs (Fig 2c) and spleen (Fig 2d). This indicates that CysVac2/Advax is sufficient for protection and

this protection does not correlate with the presence of multifunctional T cells secreting high levels of inflammatory cytokines.

### **Intrapulmonary CysVac2/Advax generates lung-resident, antigen-specific CD4<sup>+</sup> T cells**

To more precisely define the vaccine-specific responses after immunization with CysVac2/Advax, Ag85B:I-A<sup>b</sup> tetramer staining was employed to identify CD4<sup>+</sup> T cells specific for the p25 epitope of Ag85B, an antigenic component of CysVac2[17]. Ag85B tetramer-positive (Ag85Btet<sup>+</sup>) cells in the lungs were only detected after i.t. delivery of CysVac2/Advax and not after CysVac2 antigen alone, confirming the critical role of Advax in inducing antigen-specific T cell expansion (Fig 3a). Ag85Btet<sup>+</sup> cells were present in significantly greater numbers in CysVac2/Advax vaccinated samples at all timepoints examined, although numbers contracted by 8 weeks post-vaccination (Fig 3b). CysVac2/Advax-vaccinated mice showed enrichment of lung parenchymal-residing (intravascular negative IV<sup>-</sup>) CD4<sup>+</sup> T cells, which expressed CD69 and CD44 with low level of expression of the lymphoid homing receptor, L-selectin (CD62L) (Fig 3d). This population of CD4<sup>+</sup>CD44<sup>hi</sup>CD62L<sup>low</sup>CD69<sup>+</sup> IV<sup>-</sup> were defined as T<sub>RM</sub>-like cells[23] and were significantly greater at all times points post-vaccination in CysVac2/Advax-vaccinated mice, comprising approximately 25% of total CD4<sup>+</sup> T cells in the lung following vaccination (Fig 3c). The majority of Ag85B-tet<sup>+</sup> cells detected at 8 weeks post vaccination showed a T<sub>RM</sub>-like phenotype and were present within the parenchyma of the lung (Fig 3e). Along with T<sub>RM</sub> markers, this subset expressed high levels of the integrin CD11a and the cell surface receptor PD-1, with low levels of expression of CD103 and KLRG-1 (Fig 3e). Taken together, these data indicate that CysVac2/Advax vaccination induces a population of antigen-specific CD4<sup>+</sup> T cells in the lung with a T<sub>RM</sub> phenotype, and these are detectable through 8 weeks post vaccination.

We further characterized the ability of the CD4<sup>+</sup> T cells generated in the lung to produce cytokines in response to re-stimulation with vaccine antigen at time points after vaccination (pre-challenge) as



well as at 4 weeks post-challenge with *M. tuberculosis*. Intratracheal CysVac2/Advax vaccination induced a distinct cytokine profile that was relatively consistent across all time points prior to *M. tuberculosis* infection. While a marginal increase in IFN- $\gamma$  production was observed at 4 weeks post vaccination, this was not apparent at any other time point (Fig 4a). Indeed, following infection with *M. tuberculosis*, a lower percentage of IFN- $\gamma$ -producing CD4<sup>+</sup> T cells was present in CysVac2/Advax vaccinated lung samples compared with samples from unvaccinated animals. By contrast, percentages of IL-2, IL-17 or TNF cytokine-producing cells were markedly increased after i.t. vaccination with CysVac2/Advax compared to unvaccinated or CysVac2 vaccinated mice up to 8 weeks post-vaccination (Fig 4b, 4c, 4d), however only IL-17 remained elevated post-challenge (Fig 4b). Further analysis revealed that the major source of IL-17 originated from CD45 IV-CD4<sup>+</sup> T cells that expressed ROR $\gamma$ T (Fig 4e). Furthermore, the Ag85Btet<sup>+</sup> population was highly enriched in ROR $\gamma$ T<sup>+</sup> CD45 IV-IL-17<sup>+</sup>CD4<sup>+</sup> T cells (Fig 4f). Overall, these data suggest that pulmonary vaccination with CysVac2/Advax promotes increased single and multifunctional cytokine producing T cell populations both before and after aerosol challenge with *M. tuberculosis*, which is characterized by the development of a tissue-resident Th17-type response.

### **IL-17-mediated protection correlates with early recruitment of phagocytic cells and enhanced priming of pathogen-specific CD4<sup>+</sup> T cells**

Given the marked Th17 polarization of the CD4<sup>+</sup> T cell response to pulmonary immunization with CysVac2/Advax, we next determined the impact of neutralizing IL-17 at the time of *M. tuberculosis* challenge (Fig 5a). Treatment with anti-IL-17 mAb did not affect the capacity of CD4<sup>+</sup> T cells to respond to infection, as the frequency of cytokine-producing CD4<sup>+</sup> T cells was not altered between mice treated with anti-IL-17 or isotype control mAb (Fig 5b). However, anti-IL-17 treatment had a detrimental effect on control of bacterial infection in the lung of CysVac2/Advax immunised mice; bacteria numbers in anti-IL-17 treated mice were similar to unvaccinated mice, while immunised mice treated with isotype control mAb remained protected against infection (Fig 5c).

209 We also studied the impact of IL-17 blocking on lung cell subsets after *M. tuberculosis* infection  
 210 using flow cytometry phenotyping combined with an unsupervised visual implementation of t-  
 211 distributed stochastic neighbour embedding (tSNE) analysis. The generated tSNE plot was calculated  
 212 with 12 parameters and 10 clusters obtained using unsupervised analysis were subsequently assigned  
 213 to a specific cell population (Fig 5d), according to expression level of each marker and previously  
 214 described phenotypes (S3Fig). This analysis revealed that the percentage of neutrophils in the lung  
 215 were elevated in vaccinated mice treated with control mAb, however they returned to the level of  
 216 unvaccinated animals after treatment with the anti-IL-17 mAb (Fig 5e). A similar pattern was observed  
 217 for monocytes and interstitial macrophages, however no differences were observed for other  
 218 phagocytic populations in the lung, such as alveolar macrophages (Fig 5e).

219  
 220 We next investigated the effect of blocking IL-17 on the priming and proliferation of CD4<sup>+</sup> T cells.  
 221 To do this, we examined CD4<sup>+</sup> T cells primed by the vaccination (Ag85B-tet<sup>+</sup>) and compared to T  
 222 cells responding specifically to *M. tuberculosis* (ESAT6-tet<sup>+</sup>). In the lung we observed a greater  
 223 proportion of Ag85B-tet<sup>+</sup> cells in vaccinated mice compared to unvaccinated mice, however anti-IL-  
 224 17 treatment did not significantly alter the numbers of proliferating CD4<sup>+</sup> T cells (S4a, b, and c Fig)  
 225 or the numbers of Ag85B-tet<sup>+</sup> or ESAT6-tet<sup>+</sup> cells (S4d, e and f Fig). However, in the mLN of  
 226 vaccinated mice a distinct vaccine-induced population of proliferating CD4<sup>+</sup> T cells expressing  
 227 RORγT was distinguishable (Fig 6a). IL-17 blocking resulted in reduced proliferation of total CD4<sup>+</sup>  
 228 T cells in the mLN of vaccinated mice (Fig 6b) including the vaccine-primed RORγT<sup>+</sup> cells (Fig 6c).  
 229 When the frequency of the vaccine-primed CD4<sup>+</sup> T cells (Ag85B-tet<sup>+</sup>) were compared to those primed  
 230 only by *M. tuberculosis* infection (ESAT6-tet<sup>+</sup>) (Fig 6d), Ag85B-tet<sup>+</sup> cells were significantly higher  
 231 in vaccinated mice compared to the unvaccinated group, however anti-IL-17 treatment did not affect  
 232 the numbers of Ag85B-tet<sup>+</sup> cells (Fig 6e). By contrast, the numbers of ESAT6-tet<sup>+</sup> positive CD4<sup>+</sup> T  
 233 cells were reduced after IL-17 blocking in the mLNs (Fig 6f). Overall, neutralizing of IL-17 reduced

234 phagocytic cells in the lung of immunized animals and the numbers of pathogen-specific CD4<sup>+</sup> T  
235 cells in the draining LNs, which correlated with a loss of vaccine-mediated protection.

## Discussion

The respiratory tract is the preferred port of entry of *M. tuberculosis*, with the complexity of the immunological environment in the lung potentially contributing to suboptimal pathogen responses. This may be particularly detrimental in the case of *M. tuberculosis* infection, where priming and recruitment of effector T lymphocytes to the lungs is delayed, allowing unchecked growth of the organism[24, 25]. For this reason, mucosal vaccination has been of interest in the field of TB vaccines, with pulmonary delivery of BCG[14, 26], live recombinant viruses[8, 27, 28], or protein/adjuvants[29, 30] resulting in protective immune responses. When administered to the respiratory mucosa, highly inflammatory adjuvanted vaccines may induce protective immunity, but this is often accompanied by excessive inflammation, mucus accumulation and eosinophilia[31]. Thus, there is a need for adjuvants that can induce protective lung immunity in the absence of deleterious inflammation and pathology. We found that i.t. delivery of CysVac2/Advax<sup>CpG</sup> was significantly more protective than i.m. vaccination against challenge with *M. tuberculosis* (Fig 1). Strikingly i.t. vaccination, despite being more protective, did not induce appreciable numbers of multifunctional CD4<sup>+</sup> T cells (IFN- $\gamma$ <sup>+</sup>IL-2<sup>+</sup>TNF<sup>+</sup>; Fig 1) and even more surprisingly removal of CpG from the formulation did not reduce vaccine protection, despite a loss of multifunctional CD4<sup>+</sup> T cell generation (Fig 2). Induction of multifunctional T cell responses has been used as a key criteria for vaccine progression to human trials, however recent evidence in both mice and humans indicates that the generation of IFN- $\gamma$  secreting T cells does not necessarily correlate with protection[32]. Indeed, in our data IFN- $\gamma$  was the only cytokine analyzed pre- and post-challenge that did not correlate with the protective effect of the CysVac2/Advax vaccine (Fig 4), an important finding for the selection of vaccines for progression to human trials.

We observed that pulmonary vaccination with CysVac2 vaccination induced a lung resident CD4<sup>+</sup> population that expressed markers of T<sub>RM</sub>-like cells (Fig 3). We have previously shown that a recombinant influenza vaccine conferred protection against *M. tuberculosis* in the absence of

circulating memory T cells, suggesting an important role for *M. tuberculosis*-specific T<sub>RM</sub>[8]. In the current study, detailed phenotypic analysis of CysVac2/Advax-induced, antigen-specific CD4<sup>+</sup> T<sub>RM</sub>-like cells showed that in addition to well-characterized markers of tissue-resident memory cells (CD69<sup>+</sup> CD44<sup>hi</sup> CD62L<sup>low</sup> CD45 IV<sup>-</sup>), this population displayed high levels of CD11a with minimal expression of CD103 (Fig 3). This low level of CD103 expression contrasts with the increased expression of CD103 on CD8 T<sub>RM</sub>, where this integrin is thought to be essential in the retention of these cells within tissue[33]. Antigen-specific T<sub>RM</sub> cells induced following CysVac2/Advax vaccination also displayed a dominant PD-1<sup>+</sup> KLRG-1<sup>-</sup> phenotype (Fig 3). During *M. tuberculosis* infection, PD-1 expression indicates an earlier stage of CD4<sup>+</sup> T cell differentiation that is associated with a higher proliferative capacity, while KLRG-1<sup>+</sup> cells are more terminally differentiated and produce greater levels of cytokines[34]. IL-2-secreting KLRG-1<sup>-</sup> T cells induced by subunit booster vaccination are associated with protection against chronic *M. tuberculosis*, owing to maintenance of their proliferative capacity[35], and circulating KLRG-1<sup>-</sup> CD4<sup>+</sup> T cells induced by subcutaneous H56/CAF01 vaccination display the ability to home to the lungs[36]. Our findings confirmed an association between vaccine-induced, PD-1<sup>+</sup>KLRG-1<sup>-</sup> CD4<sup>+</sup> T cells that reside within the lung parenchyma and protection against *M. tuberculosis*. It is possible these cells possess greater effector functions and proliferative capacity than their KLRG-1<sup>+</sup> counterparts and are therefore capable of enhanced protection against *M. tuberculosis* infection.

Lung-resident CD4<sup>+</sup> T<sub>RM</sub> were found to be an important source of IL-17 induced after Advax:CysVac2 i.t. delivery, and this was not observed after i.m. delivery of the vaccine. This is in agreement with other studies showing that IL-17 is strongly induced following mucosal vaccination and correlates with protection against *M. tuberculosis* infection[37, 38], yet the mechanism by which this protection is specifically mediated is not well defined. Blocking of IL-17 during *M. tuberculosis* challenge in CysVac2/Advax-vaccinated mice resulted in a complete loss of vaccine-induced protection and correlated with reduced recruitment of lung phagocytic cells such as neutrophils and

macrophages, as well as a reduced priming of *M. tuberculosis*-specific T cells in the mLN (Fig 5, 6). Thus we can propose a mechanism (Fig 7) whereby IL-17 production by vaccine-specific CD4<sup>+</sup> T<sub>RM</sub> facilitates neutrophil and Monocytes/macrophages recruitment[11], and promotes the activation and proliferation of protective, pathogen-specific CD4<sup>+</sup> T cells in the mLN [39], [40],[41]. Interstitial macrophages recruitment might be beneficial because these populations appear to possess significant antimycobacterial activity, as opposed to alveolar macrophages [42]. Previous work in a different infectious model has additionally demonstrated that IL-17 can mediate the recruitment of neutrophils with anti-bacterial potential[11]. Our observations differ to previous reports using the ID93+GLA-SE mucosal TB vaccine, which resulted in a Th17-dominated, tissue-resident response, but did not lead to improved protection when compared to parenteral immunization[43]. This may indicate that different adjuvants may induce diverse T<sub>RM</sub> populations, and the capacity of Advax to direct a predominant, vaccine-specific T<sub>RM</sub> response in the lung may be a key determinant in the protective efficacy of CysVac2/Advax vaccine.

Harnessing the protective role of IL-17 against pathogens needs to be balanced with potential tissue damage and pathology associated with excess cytokine levels[15]. Thus, adjuvants stimulating excessive levels of IL-17 are unlikely to be suitable for human lung administration, as observed for a candidate Sporotrichosis vaccine[44]. When CpG was removed from the CysVac2/Advax vaccine, the frequency of IL-17 secreting T cells in the lung was reduced, yet protection against *M. tuberculosis* challenge was not affected (Fig 2, S2 Fig). This suggests that a threshold of IL-17-secreting T cells may exist for vaccine-induced protection against *M. tuberculosis* and selecting the most ‘immunogenic’ vaccines based on the greatest level of effector responses may not be the best strategy for identifying an optimal *M. tuberculosis* vaccine formulation.

In conclusion, this report demonstrates that Advax-adjuvanted vaccines can be safely delivered to the lung to provide significant protection against aerosol *M. tuberculosis* infection. The protective effect

315 of the vaccine was associated with targeted expansion of lung-resident T<sub>RM</sub> and was dependent on  
 316 IL-17 recruitment of phagocytic cells to the lung and enhanced priming of T cells in the mLN. As  
 317 Advax-containing vaccines have proven safe and immunogenic in human trials against viral infection  
 318 and allergy[19, 45, 46] and are safe and effective in pre-clinical trials as inhaled formulations[21],  
 319 CysVac2/Advax is a promising candidate for assessment of safety, immunogenicity and efficacy as  
 320 a pulmonary vaccine in human subjects.

## 321 **Materials and Methods**

### 322 **Ethics statement**

323 Female C57BL/6 (6-8 weeks of age) were purchased from Australian BioResources (NSW, Australia),  
 324 and housed at the Centenary Institute animal facility (Sydney, Australia) in specific pathogen-free  
 325 conditions. All mouse work was performed according to ethical guidelines as set out by the University  
 326 of Sydney Animal Ethics Committee. All experiments within this manuscript were approved under  
 327 protocol number 2017/011. University of Sydney Animal Ethics Committee guidelines adhere to the  
 328 Australian Code for the Care and Use of Animals for Scientific Purposes (2013) as set out by the  
 329 National Health and Medical Research Council of Australia.

### 331 **Bacterial strains**

332 *M. tuberculosis* H37Rv (BEI Resources, USA) and BCG Pasteur were grown at 37° C in Middlebrook  
 333 7H9 medium (Becton Dickinson, BD) supplemented with 0.5 % glycerol, 0.02 % Tyloxapol, and 10 %  
 334 albumin-dextrose-catalase (ADC) or on solid Middlebrook 7H11 medium (BD) supplemented with  
 335 oleic acid–ADC.

### 337 **Mouse immunization, treatments and infection**

338 CysVac2 fusion protein (Ag85B-CysD) was recombinantly expressed in *E. coli*, purified from  
 339 inclusions bodies by ChinaPeptides (Shanghai, China), and refolded in Tris-buffer. Advax (delta-  
 340 inulin, 50 mg/ml) and Advax<sup>CpG</sup> (delta-inulin plus CpG, 50 mg/ml and 500 µg/ml, respectively) were  
 341 provided by Vaxine Pty Ltd (Adelaide, Australia). Mice were anaesthetized by intraperitoneal (i.p.)  
 342 injection of Ketamine/Xylazine (80/100mg/kg mouse) and then vaccinated with 1 mg of Advax or  
 343 Advax<sup>CpG</sup> and 3 µg of CysVac2 in a final volume of 50 µL PBS via i.m. route, using an insulin syringe  
 344 (BD), or via the i.t. route, using PennCentury Microsprayer Aerosoliser (PennCentury, PA, USA).  
 345 Three µg of CysVac2 alone or sterile PBS were administered as controls where appropriate. Mice  
 346 were immunized subcutaneously with 5x10<sup>5</sup> BCG for protection experiments.



347

348 For neutralization of IL-17, mice were injected i.p. with 250 µg of anti-IL-17A (clone TC11-18H10.1,  
349 Biolegend) or isotype control (clone RTK2071, Biolegend) one day prior to *M. tuberculosis* infection  
350 and then every three days for three weeks.

351

352 For *M. tuberculosis* challenge experiments, six or 8 weeks after the last vaccination mice were  
353 infected with *M. tuberculosis* H37Rv via the aerosol route using a Middlebrook airborne infection  
354 apparatus (Glas-Col, IN, USA) with an infective dose of approximately 100 viable bacilli. Three or  
355 4 weeks later, the lungs and spleen were harvested, homogenized and plated after serial dilution on  
356 supplemented Middlebrook 7H11 agar plates. Colonies forming units (CFU) were determined 3  
357 weeks later and expressed as Log<sub>10</sub> CFU.

358

359 For intravascular staining of leucocytes, three minutes before euthanasia, mice were i.v. injected with  
360 200 µL biotin-conjugated anti-CD45 mAb in PBS (15 µg/mL, Biolegend, clone 104) into the lateral  
361 tail vein. Detection of biotin was performed with APC-Cy7-conjugated streptavidin (BioLegend).

362

### 363 **Cell isolation, peptide stimulations and flow cytometry**

364 PBMCs were isolated from whole blood as previously described[17]. Single cell suspensions were  
365 prepared from the lung as previously described[17]. PE-conjugated Ag85B<sub>240-254</sub>:I-A<sup>b</sup> tetramer and  
366 APC-conjugated ESAT6<sub>1-20</sub>:I-A<sup>b</sup> tetramer were provided by the NIH Tetramer Core Facility. For  
367 staining, cells were incubated with tetramers at 37 °C for 1 hour. Cells were stained using the marker-  
368 specific fluorochrome-labeled mAbs indicated in S1 Table. To assess antigen-specific cytokine  
369 induction by T cells, PBMCs or single-cell suspensions from the lung were stimulated for 4 hours  
370 with CysVac2 (5 µg/mL) and then supplemented with brefeldin A (10 µg/mL) for further 10-12 hours.  
371 Cells were surface stained with Fixable Blue Dead Cell Stain (Life Technologies) and the marker-  
372 specific fluorochrome-labeled antibodies indicated in Supplementary Table. Cells were then fixed

and permeabilized using the BD Cytotfix/Cytoperm™ kit according to the manufacturer's protocol. When required, intracellular staining was performed using mAbs against the specific cytokines (S1 Table). Samples were acquired on a BD LSR-Fortessa (BD), and analyzed using FlowJo™ analysis software (Treestar, USA). A Boolean combination of gates was used to calculate the frequency of single-, double- and triple-positive CD4<sup>+</sup> T cell subsets. tSNE was run using default FlowJo parameters (iterations = 1000, perplexity = 30). Samples were randomly downsampled to 2000 events per sample and analysis was run on equal numbers of events per sample using FlowJo tSNE plugin.

### Statistical analysis

Statistical analysis was performed using GraphPad Prism 6 software (GraphPad Software, USA). The significance of differences between experimental groups was evaluated by one-way analysis of variance (ANOVA), with pairwise comparison of multi-grouped data sets achieved using the Tukey post-hoc test. Differences are considered statistically different when  $p \leq 0.01$ .

### Acknowledgments

This work was supported by a National Health and Medical Research Council (NHMRC) Project Grant (APP1043519) and the NHMRC Centre of Research Excellence in Tuberculosis Control (APP1043225). We acknowledge the support of the European H2020 grant TBVAC2020 15 643381, the provision of reagents through the NIH Tetramer Core Facility and assistance from the Advanced Cytometry Facility and animal facility at the Centenary Institute. NP is supported by National Institutes of Health contract HHSN272201400053C and development of Advax adjuvant was supported by NIH Contracts AI061142 and HHSN272200800039C.

### Author contributions

**Conceptualization:** Claudio Counoupas, Nikolai Petrovsky, Warwick J. Britton, James A. Triccas

**Data curation:** Claudio Counoupas, Kia Ferrell, Anneliese Ashhurst, James A. Triccas

399 **Formal analysis:** Claudio Counoupas, Kia Ferrell, Anneliese Ashhurst, James A. Triccas  
400 **Funding acquisition:** Nikolai Petrovsky, Warwick J. Britton, James A. Triccas  
401 **Investigation:** Claudio Counoupas, Kia Ferrell, Anneliese Ashhurst, Nayan Bhattacharyya, Gayathri  
402 Nagalingam  
403 **Methodology:** Claudio Counoupas, Kia Ferrell, Anneliese Ashhurst, Nayan Bhattacharyya, Carl G.  
404 Feng, James A. Triccas  
405 **Project administration:** James A. Triccas  
406 **Resources:** Carl G. Feng, Nikolai Petrovsky, Warwick J. Britton, James A. Triccas  
407 **Supervision:** Claudio Counoupas, James A. Triccas  
408 **Writing – original draft:** Claudio Counoupas, Kia Ferrell, James A. Triccas  
409 **Writing – review & editing:** Claudio Counoupas, Kia Ferrell, Anneliese Ashhurst, Nayan  
410 Bhattacharyya, Gayathri Nagalingam, Carl G. Feng, Nikolai Petrovsky, Warwick J. Britton, James  
411 A. Triccas  
412  
413 **Conflict of Interest Disclosure:** NP is the research director for Vaxine P/L. All authors attest they  
414 meet the criteria for authorship.

## References

1. World Health Organization. Global tuberculosis report 2018. WHO, 2018.
2. Mangtani P, Abubakar I, Ariti C, Beynon R, Pimpin L, Fine PE, et al. Protection by BCG vaccine against tuberculosis: a systematic review of randomized controlled trials. *Clin Infect Dis*. 2014;58(4):470-80. doi: 10.1093/cid/cit790. PubMed PMID: 24336911.
3. Knight GM, Griffiths UK, Sumner T, Laurence YV, Gheorghe A, Vassall A, et al. Impact and cost-effectiveness of new tuberculosis vaccines in low- and middle-income countries. *Proc Natl Acad Sci U S A*. 2014;111(43):15520-5. doi: 10.1073/pnas.1404386111. PubMed PMID: 25288770; PubMed Central PMCID: PMCPMC4217399.
4. Kaufmann SH, Weiner J, von Reyn CF. Novel approaches to tuberculosis vaccine development. *Int J Infect Dis*. 2017;56:263-7. Epub 2016/11/07. doi: 10.1016/j.ijid.2016.10.018. PubMed PMID: 27816661.
5. Van Der Meeren O, Hatherill M, Nduba V, Wilkinson RJ, Muyoyeta M, Van Brakel E, et al. Phase 2b controlled trial of M72/AS01E vaccine to prevent tuberculosis. *N Engl J Med*. 2018;379(17):1621-34. Epub 2018/10/04. doi: 10.1056/NEJMoa1803484. PubMed PMID: 30280651; PubMed Central PMCID: PMCPMC6151253.
6. Tait DR, Hatherill M, Van Der Meeren O, Ginsberg AM, Van Brakel E, Salaun B, et al. Final analysis of a trial of M72/AS01E vaccine to prevent tuberculosis. *N Engl J Med*. 2019;381(25):2429-39. Epub 2019/10/30. doi: 10.1056/NEJMoa1909953. PubMed PMID: 31661198.
7. Shim BS, Cheon IS, Lee E, Park SM, Choi Y, Jung DI, et al. Development of safe and non-self-immunogenic mucosal adjuvant by recombinant fusion of cholera toxin A1 Subunit with protein transduction domain. *J Immunol Res*. 2018;2018:9830701. Epub 2018/05/01. doi: 10.1155/2018/9830701. PubMed PMID: 29707588; PubMed Central PMCID: PMCPMC5863330.
8. Florido M, Muflihah H, Lin LCW, Xia Y, Sierro F, Palendira M, et al. Pulmonary immunization with a recombinant influenza A virus vaccine induces lung-resident CD4(+) memory

- 440 T cells that are associated with protection against tuberculosis. *Mucosal Immunol.* 2018. doi:  
441 10.1038/s41385-018-0065-9. PubMed PMID: 30115996.
- 442 9. Darrah PA, Zeppa JJ, Maiello P, Hackney JA, Wadsworth MH, 2nd, Hughes TK, et al.  
443 Prevention of tuberculosis in macaques after intravenous BCG immunization. *Nature.*  
444 2020;577(7788):95-102. Epub 2020/01/03. doi: 10.1038/s41586-019-1817-8. PubMed PMID:  
445 31894150.
- 446 10. Perdomo C, Zedler U, Kuhl AA, Lozza L, Saikali P, Sander LE, et al. Mucosal BCG  
447 vaccination induces protective lung-resident memory T cell populations against tuberculosis. *MBio.*  
448 2016;7(6). doi: 10.1128/mBio.01686-16. PubMed PMID: 27879332; PubMed Central PMCID:  
449 PMCPMC5120139.
- 450 11. Flannigan KL, Ngo VL, Geem D, Harusato A, Hirota SA, Parkos CA, et al. IL-17A-mediated  
451 neutrophil recruitment limits expansion of segmented filamentous bacteria. *Mucosal Immunol.*  
452 2017;10(3):673-84. doi: 10.1038/mi.2016.80. PubMed PMID: 27624780; PubMed Central PMCID:  
453 PMCPMC5350071.
- 454 12. Khader SA, Bell GK, Pearl JE, Fountain JJ, Rangel-Moreno J, Cilley GE, et al. IL-23 and IL-  
455 17 in the establishment of protective pulmonary CD4<sup>+</sup> T cell responses after vaccination and during  
456 *Mycobacterium tuberculosis* challenge. *Nat Immunol.* 2007;8(4):369-77. doi: 10.1038/ni1449.  
457 PubMed PMID: 17351619.
- 458 13. Ahmed M, Smith DM, Hamouda T, Rangel-Moreno J, Fattom A, Khader SA. A novel  
459 nanoemulsion vaccine induces mucosal Interleukin-17 responses and confers protection upon  
460 *Mycobacterium tuberculosis* challenge in mice. *Vaccine.* 2017;35(37):4983-9. doi:  
461 10.1016/j.vaccine.2017.07.073. PubMed PMID: 28774560; PubMed Central PMCID:  
462 PMCPMC5572488.
- 463 14. Moliva JJ, Hossfeld AP, Sidiki S, Canan CH, Dwivedi V, Beamer G, et al. Selective  
464 delipidation of *Mycobacterium bovis* BCG enables direct pulmonary vaccination and enhances

- 465 protection against *Mycobacterium tuberculosis*. Mucosal Immunol. 2019. Epub 2019/02/20. doi:  
466 10.1038/s41385-019-0148-2. PubMed PMID: 30778118.
- 467 15. Das S, Khader S. Yin and yang of interleukin-17 in host immunity to infection. F1000Res.  
468 2017;6:741. Epub 2017/07/18. doi: 10.12688/f1000research.10862.1. PubMed PMID: 28713557;  
469 PubMed Central PMCID: PMCPMC5490359.
- 470 16. Counoupas C, Pinto R, Nagalingam G, Britton WJ, Petrovsky N, Triccas JA. Delta inulin-  
471 based adjuvants promote the generation of polyfunctional CD4(+) T cell responses and protection  
472 against *Mycobacterium tuberculosis* infection. Sci Rep. 2017;7(1):8582. Epub 2017/08/19. doi:  
473 10.1038/s41598-017-09119-y. PubMed PMID: 28819247; PubMed Central PMCID:  
474 PMCPMC5561132.
- 475 17. Counoupas C, Pinto R, Nagalingam G, Hill-Cawthorne GA, Feng CG, Britton WJ, et al.  
476 *Mycobacterium tuberculosis* components expressed during chronic infection of the lung contribute  
477 to long-term control of pulmonary tuberculosis in mice. NPJ Vaccines. 2016;1:16012. Epub  
478 2016/09/15. doi: 10.1038/npjvaccines.2016.12. PubMed PMID: 29263854; PubMed Central PMCID:  
479 PMCPMC5707878.
- 480 18. Feinen B, Petrovsky N, Verma A, Merkel TJ. Advax-adjuvanted recombinant protective  
481 antigen provides protection against inhalational anthrax that is further enhanced by addition of  
482 murabutide adjuvant. Clin Vaccine Immunol. 2014;21(4):580-6. Epub 2014/02/21. doi:  
483 10.1128/CVI.00019-14. PubMed PMID: 24554695; PubMed Central PMCID: PMCPMC3993118.
- 484 19. Gordon DL, Sajkov D, Honda-Okubo Y, Wilks SH, Aban M, Barr IG, et al. Human Phase I  
485 trial of low-dose inactivated seasonal influenza vaccine formulated with Advax delta inulin adjuvant.  
486 Vaccine. 2016;34(33):3780-6. Epub 2016/06/28. doi: 10.1016/j.vaccine.2016.05.071. PubMed PMID:  
487 27342914; PubMed Central PMCID: PMCPMC4949042.
- 488 20. Tomar J, Biel C, de Haan CAM, Rottier PJM, Petrovsky N, Frijlink HW, et al. Passive  
489 inhalation of dry powder influenza vaccine formulations completely protects chickens against H5N1  
490 lethal viral challenge. Eur J Pharm Biopharm. 2018;133:85-95. PubMed PMID: 30312742.

- 491 21. Tomar J, Patil HP, Bracho G, Tonniss WF, Frijlink HW, Petrovsky N, et al. Advax augments  
492 B and T cell responses upon influenza vaccination via the respiratory tract and enables complete  
493 protection of mice against lethal influenza virus challenge. J Control Release. 2018;288:199-211. doi:  
494 10.1016/j.jconrel.2018.09.006. PubMed PMID: 30218687.
- 495 22. Chu RS, Targoni OS, Krieg AM, Lehmann PV, Harding CV. CpG oligodeoxynucleotides act  
496 as adjuvants that switch on T helper 1 (Th1) immunity. J Exp Med. 1997;186(10):1623-31. PubMed  
497 PMID: 9362523; PubMed Central PMCID: PMCPMC2199137.
- 498 23. Park CO, Kupper TS. The emerging role of resident memory T cells in protective immunity  
499 and inflammatory disease. Nat Med. 2015;21(7):688-97. Epub 2015/06/30. doi: 10.1038/nm.3883.  
500 PubMed PMID: 26121195; PubMed Central PMCID: PMCPMC4640452.
- 501 24. Reiley WW, Calayag MD, Wittmer ST, Huntington JL, Pearl JE, Fountain JJ, et al. ESAT-6-  
502 specific CD4 T cell responses to aerosol *Mycobacterium tuberculosis* infection are initiated in the  
503 mediastinal lymph nodes. Proc Natl Acad Sci U S A. 2008;105(31):10961-6. Epub 2008/08/01. doi:  
504 10.1073/pnas.0801496105. PubMed PMID: 18667699; PubMed Central PMCID: PMCPMC2504808.
- 505 25. Wolf AJ, Desvignes L, Linas B, Banaiee N, Tamura T, Takatsu K, et al. Initiation of the  
506 adaptive immune response to *Mycobacterium tuberculosis* depends on antigen production in the local  
507 lymph node, not the lungs. J Exp Med. 2008;205(1):105-15. Epub 2007/12/26. doi:  
508 10.1084/jem.20071367. PubMed PMID: 18158321; PubMed Central PMCID: PMCPMC2234384.
- 509 26. Bull NC, Stylianou E, Kaveh DA, Pinpathomrat N, Pasricha J, Harrington-Kandt R, et al.  
510 Enhanced protection conferred by mucosal BCG vaccination associates with presence of antigen-  
511 specific lung tissue-resident PD-1(+) KLRG1(-) CD4(+) T cells. Mucosal Immunol. 2019;12(2):555-  
512 64. Epub 2018/11/18. doi: 10.1038/s41385-018-0109-1. PubMed PMID: 30446726.
- 513 27. Green CA, Sande CJ, Scarselli E, Capone S, Vitelli A, Nicosia A, et al. Novel genetically-  
514 modified chimpanzee adenovirus and MVA-vectored respiratory syncytial virus vaccine safely  
515 boosts humoral and cellular immunity in healthy older adults. J Infect. 2019. Epub 2019/02/12. doi:  
516 10.1016/j.jinf.2019.02.003. PubMed PMID: 30742894.



28. Manjaly Thomas ZR, Satti I, Marshall JL, Harris SA, Lopez Ramon R, Hamidi A, et al. Alternate aerosol and systemic immunisation with a recombinant viral vector for tuberculosis, MVA85A: A phase I randomised controlled trial. PLoS Med. 2019;16(4):e1002790. Epub 2019/05/01. doi: 10.1371/journal.pmed.1002790. PubMed PMID: 31039172; PubMed Central PMCID: PMCPMC6490884 following competing interests: HMcS is a Jenner Institute Investigator and a Wellcome Trust Senior Clinical Research Fellow. ZM was a NIHR BRC Clinical Research Training fellow.
29. Van Dis E, Sogi KM, Rae CS, Sivick KE, Surh NH, Leong ML, et al. STING-activating adjuvants elicit a Th17 immune response and protect against *Mycobacterium tuberculosis* infection. Cell Rep. 2018;23(5):1435-47. doi: 10.1016/j.celrep.2018.04.003. PubMed PMID: 29719256; PubMed Central PMCID: PMCPMC6003617.
30. Copland A, Diogo GR, Hart P, Harris S, Tran AC, Paul MJ, et al. Mucosal delivery of fusion proteins with *Bacillus subtilis* spores enhances protection against tuberculosis by Bacillus Calmette-Guerin. Front Immunol. 2018;9:346. doi: 10.3389/fimmu.2018.00346. PubMed PMID: 29593708; PubMed Central PMCID: PMCPMC5857916.
31. Kim KH, Lee YT, Hwang HS, Kwon YM, Jung YJ, Lee Y, et al. Alum Adjuvant Enhances Protection against respiratory syncytial virus but exacerbates pulmonary inflammation by modulating multiple innate and adaptive immune cells. PLoS One. 2015;10(10):e0139916. Epub 2015/10/16. doi: 10.1371/journal.pone.0139916. PubMed PMID: 26468884; PubMed Central PMCID: PMCPMC4607166.
32. Rodo MJ, Rozot V, Nemes E, Dintwe O, Hatherill M, Little F, et al. A comparison of antigen-specific T cell responses induced by six novel tuberculosis vaccine candidates. PLoS Pathog. 2019;15(3):e1007643. Epub 2019/03/05. doi: 10.1371/journal.ppat.1007643. PubMed PMID: 30830940; PubMed Central PMCID: PMCPMC6417742.
33. Wakim LM, Woodward-Davis A, Bevan MJ. Memory T cells persisting within the brain after local infection show functional adaptations to their tissue of residence. Proc Natl Acad Sci U S A.



- 2010;107(42):17872-9. Epub 2010/10/07. doi: 10.1073/pnas.1010201107. PubMed PMID: 20923878; PubMed Central PMCID: PMC2964240.
34. Reiley WW, Shafiani S, Wittmer ST, Tucker-Heard G, Moon JJ, Jenkins MK, et al. Distinct functions of antigen-specific CD4 T cells during murine *Mycobacterium tuberculosis* infection. Proc Natl Acad Sci U S A. 2010;107(45):19408-13. Epub 2010/10/22. doi: 10.1073/pnas.1006298107. PubMed PMID: 20962277; PubMed Central PMCID: PMC2984157.
35. Lindenstrom T, Knudsen NP, Agger EM, Andersen P. Control of chronic *Mycobacterium tuberculosis* infection by CD4 KLRG1- IL-2-secreting central memory cells. J Immunol. 2013;190(12):6311-9. doi: 10.4049/jimmunol.1300248. PubMed PMID: 23677471.
36. Woodworth JS, Cohen SB, Moguche AO, Plumlee CR, Agger EM, Urdahl KB, et al. Subunit vaccine H56/CAF01 induces a population of circulating CD4 T cells that traffic into the *Mycobacterium tuberculosis*-infected lung. Mucosal Immunol. 2017;10(2):555-64. Epub 2016/08/25. doi: 10.1038/mi.2016.70. PubMed PMID: 27554293; PubMed Central PMCID: PMC5325828.
37. Aguilo N, Alvarez-Arguedas S, Uranga S, Marinova D, Monzon M, Badiola J, et al. Pulmonary but not subcutaneous delivery of BCG vaccine confers protection to tuberculosis-susceptible mice by an Interleukin 17-dependent mechanism. J Infect Dis. 2016;213(5):831-9. doi: 10.1093/infdis/jiv503. PubMed PMID: 26494773.
38. Gopal R, Rangel-Moreno J, Slight S, Lin Y, Nawar HF, Fallert Junecko BA, et al. Interleukin-17-dependent CXCL13 mediates mucosal vaccine-induced immunity against tuberculosis. Mucosal Immunol. 2013;6(5):972-84. doi: 10.1038/mi.2012.135. PubMed PMID: 23299616; PubMed Central PMCID: PMC3732523.
39. Liang F, Lindgren G, Sandgren KJ, Thompson EA, Francica JR, Seubert A, et al. Vaccine priming is restricted to draining lymph nodes and controlled by adjuvant-mediated antigen uptake. Sci Transl Med. 2017;9(393). doi: 10.1126/scitranslmed.aal2094. PubMed PMID: 28592561.
40. Morel C, Badell E, Abadie V, Robledo M, Setterblad N, Gluckman JC, et al. *Mycobacterium bovis* BCG-infected neutrophils and dendritic cells cooperate to induce specific T cell responses in

- humans and mice. Eur J Immunol. 2008;38(2):437-47. Epub 2008/01/19. doi: 10.1002/eji.200737905.  
PubMed PMID: 18203135.
41. Blomgran R, Ernst JD. Lung neutrophils facilitate activation of naive antigen-specific CD4+  
T cells during *Mycobacterium tuberculosis* infection. J Immunol. 2011;186(12):7110-9. doi:  
10.4049/jimmunol.1100001. PubMed PMID: 21555529; PubMed Central PMCID: PMC3376160.
42. Huang L, Nazarova EV, Tan S, Liu Y, Russell DG. Growth of *Mycobacterium tuberculosis*  
in vivo segregates with host macrophage metabolism and ontogeny. J Exp Med. 2018;215(4):1135-  
52. Epub 2018/03/04. doi: 10.1084/jem.20172020. PubMed PMID: 29500179; PubMed Central  
PMCID: PMCPMC5881470.
43. Orr MT, Beebe EA, Hudson TE, Argilla D, Huang PW, Reese VA, et al. Mucosal delivery  
switches the response to an adjuvanted tuberculosis vaccine from systemic TH1 to tissue-resident  
TH17 responses without impacting the protective efficacy. Vaccine. 2015;33(48):6570-8. doi:  
10.1016/j.vaccine.2015.10.115. PubMed PMID: 26541135; PubMed Central PMCID:  
PMCPMC4679420.
44. Portuondo DL, Batista-Duharte A, Ferreira LS, de Andrade CR, Quinello C, Tellez-Martinez  
D, et al. Comparative efficacy and toxicity of two vaccine candidates against *Sporothrix schenckii*  
using either Montanide Pet Gel A or aluminum hydroxide adjuvants in mice. Vaccine.  
2017;35(34):4430-6. Epub 2017/07/09. doi: 10.1016/j.vaccine.2017.05.046. PubMed PMID:  
28687406.
45. Gordon D, Kelley P, Heinzl S, Cooper P, Petrovsky N. Immunogenicity and safety of Advax,  
a novel polysaccharide adjuvant based on delta inulin, when formulated with hepatitis B surface  
antigen: a randomized controlled Phase 1 study. Vaccine. 2014;32(48):6469-77. Epub 2014/10/01.  
doi: 10.1016/j.vaccine.2014.09.034. PubMed PMID: 25267153; PubMed Central PMCID:  
PMCPMC4253909.
46. Heddle R, Smith A, Woodman R, Hissaria P, Petrovsky N. Randomized controlled trial  
demonstrating the benefits of delta inulin adjuvanted immunotherapy in patients with bee venom

595 allergy. J Allergy Clin Immunol. 2019;144(2):504-13 e16. Epub 2019/07/14. doi:  
596 10.1016/j.jaci.2019.03.035. PubMed PMID: 31300280.

597

598

## Figure Legends

**Figure 1. Pulmonary vaccination with CysVac2/Advax<sup>CpG</sup> demonstrates improved protection against *M. tuberculosis* infection compared to parenteral administration.** C57BL/6 mice (n=5-6) were vaccinated by either the i.m. or i.t. route with CysVac2(CV2)/Advax<sup>CpG</sup> (3 times, 2 weeks apart). One week after last vaccination mice were bled for vaccine immunogenicity assessment. Six weeks after last immunization mice were challenged with H37Rv by aerosol (~100 CFU) and four weeks later culled to enumerate bacterial burden and T cell phenotype in the lung (a). PBMCs from tail blood of vaccinated mice (b, c, d) or cells from lung of infected mice (e, f, g) were restimulated *ex vivo* with CysVac2, and the production cytokines (IFN- $\gamma$ , IL-2, IL-17, TNF), or transcription factors (TF; T-bet, ROR $\gamma$ T) by CD4<sup>+</sup> T cells was determined by flow cytometry. Data are represented as the percentage of cytokine-producing or transcription factor-positive CD4<sup>+</sup> T cells  $\pm$  SEM. Bacterial load was assessed in the lungs (h) and in the spleen (i) and presented as Log<sub>10</sub> of the mean CFU  $\pm$  SEM. Data are pooled from 3 independent experiments. Significance of differences between the groups was determined by ANOVA (\*p<0.05; \*\*p<0.01; \*\*\*p<0.001).

**Figure 2. CpG is dispensable for protective immunity induced by CysVac2/Advax.** C57BL/6 mice (n=5-6) were vaccinated by the i.t. route with CysVac2/Advax<sup>CpG</sup> or CysVac2/Advax (3 times, 2 weeks apart). Six weeks after last immunization mice were challenged with *M. tuberculosis* H37Rv by aerosol (~100 CFU) and four weeks later culled to enumerate bacterial burden and T cell phenotype in the lung. Cells from lung of infected mice were restimulated *ex vivo* with CysVac2 and the production of cytokines (IFN- $\gamma$ , IL-2, IL-17, TNF; panel a and b) or transcription factors (T-bet, ROR $\gamma$ T; panel c) by CD4<sup>+</sup> T cells was determined by flow cytometry. Data are represented as the percentage of cytokine-producing CD4<sup>+</sup> T cells  $\pm$  SEM. Bacterial load was assessed in the lungs (d) and in the spleen (e) and presented as Log<sub>10</sub> of the mean CFU  $\pm$  SEM. Data are pooled from 2

independent experiments. Significance of differences between the groups was determined by ANOVA (\* $p < 0.05$ ; \*\* $p < 0.01$ ; \*\*\* $p < 0.001$ ).

**Figure 3. Pulmonary vaccination with CysVac2/Advax induces Ag-specific persistent local resident CD4<sup>+</sup> T cells.** C57BL/6 mice (n=3-4) were vaccinated by the i.t. route with CysVac2/Advax or CysVac2 (3 times, 2 weeks apart). At weeks 2, 4, or 8 after final immunization, lung cells were processed for Ag85B:I-A<sup>b</sup> tetramer staining (a, Representative dot plot from 8 weeks post-immunization). Number of Ag85B:I-A<sup>b</sup> tetramer positive cells in the lung over time are shown in (b). Also shown are the percentage of total CD4<sup>+</sup> T cells expressing phenotypic markers associated with TRMs (CD45 IV<sup>-</sup>, CD11a<sup>+</sup>, CD69<sup>+</sup>, CD44<sup>+</sup>, PD1<sup>+</sup> KLRG<sup>-</sup>, c) and representative dot plots of TRMs markers on total lung CD4<sup>+</sup> T cells (d) or in Ag85B:I-A<sup>b</sup> cells (e) at 8 weeks after last vaccination. Data are representative of 2 independent experiments. Significance of differences between the groups was determined by ANOVA (\* $p < 0.05$ ; \*\* $p < 0.01$ ; \*\*\* $p < 0.001$ ).

**Figure 4. Persistent CysVac2-specific IL-17 production by lung-resident CD4<sup>+</sup> T cells after pulmonary vaccination with CysVac2/Advax.** C57BL/6 mice (n=4) were vaccinated by the i.t. route with CysVac2/Advax or CysVac2 protein alone (3 times, 2 weeks apart). Eight weeks after the last immunization mice were challenged with *M. tuberculosis* H37Rv by aerosol (~100 CFU). At 2, 4, or 8 weeks after last immunization (solid bars), and at 4 weeks after infection (striped bars), lung cells were restimulated *ex vivo* with CysVac2 and the production of IFN- $\gamma$  (a), IL-17 (b), IL-2 (c) or TNF (d) by CD4<sup>+</sup> T cells determined by flow cytometry. Representative dot plots of co-expression of CD45 IV or ROR $\gamma$ T with IL-17 by total CD4<sup>+</sup> T cells (e) or Ag85B:I-A<sup>b</sup> tetramer positive cells (f) at 8 weeks after last vaccination. Data are represented as the percentage of cytokine-producing CD4<sup>+</sup> T cells  $\pm$  SEM and is representative of 2 independent experiments. Significance of differences between the groups was determined by ANOVA (\* $p < 0.05$ ; \*\* $p < 0.01$ ; \*\*\* $p < 0.001$ ).

**Figure 5. Protection afforded by pulmonary CysVac2/Advax against aerosol *M. tuberculosis* is dependent on IL-17 and correlates with lung phagocytic cells recruitment.** C57BL/6 mice (n=6) were vaccinated by the i.t. route with CysVac2/Advax (3 times, 2 weeks apart) and at 8 weeks after last immunization mice were challenged with *M. tuberculosis* H37Rv by aerosol (~100 CFU). One day before aerosol, mice were treated i.p. with anti-IL-17 or an isotype control mAb (twice weekly for 3 weeks) (a). Cells from the lungs of infected mice were restimulated *ex vivo* with CysVac2 and cytokines secretion (IFN- $\gamma$ , IL-2, IL-17, TNF) determined (b). Bacterial load was assessed in the lungs and is presented as Log<sub>10</sub> of the mean CFU  $\pm$  SEM (c). Representative tSNE dimension 1 and 2 plots of the total live cells in the lung (d). Bar graphs show the percentage of identified lung cells subsets (e). Data are pooled of 2 independent experiments. Significance of differences between the groups was determined by ANOVA (\*p<0.05; \*\*p<0.01; \*\*\*p<0.001).

**Figure 6. Blocking IL-17 during *M. tuberculosis* infection impairs the proliferation of pathogen-specific CD4<sup>+</sup> T cells in the mediastinal lymph nodes.** C57BL/6 mice (n=6) were vaccinated with CysVac2/Advax and treated i.p. with anti-IL-17 mAb, as described in Figure 5. Representative dot plot of the expression of Ki67 and ROR $\gamma$ T on CD4<sup>+</sup> T cells (a). Bar graphs show numbers of total (b) and ROR $\gamma$ T<sup>+</sup> (c) proliferating CD4<sup>+</sup> T cells enumerated in the mLN. Representative dot plots show CD44 and either Ag85B:I-A<sup>b</sup> or ESAT6:I-A<sup>b</sup> staining on CD4<sup>+</sup> T cells in the mLN (d), with total number  $\pm$  SEM of Ag85B:I-A<sup>b</sup> (e) and ESAT6:I-A<sup>b</sup> (f) CD4<sup>+</sup> T cells in the mLN. Data are pooled of 2 independent experiments. Significance of differences between the groups was determined by ANOVA (\*p<0.05; \*\*p<0.01).

**Figure 7. Proposed mechanism of immunity generated by pulmonary vaccination with CysVac2/Advax against *M. tuberculosis* infection.** Pulmonary vaccination of CysVac2/Advax induces the development of a Th17 T<sub>RM</sub> population of antigen-specific CD4<sup>+</sup> T cells in the lung. Following aerosol *M. tuberculosis* infection, T cell IL-17 drives neutrophil and macrophage

recruitment to the lung. This early response may be responsible for increased activation or trafficking of antigen presenting cells to the mLN, which in turn promotes the priming and proliferation of pathogen-specific CD4<sup>+</sup> T cells in mLN that migrate to the lung and contribute to protection against *M. tuberculosis* infection.

**S1 Figure. Comparative analysis of multifunctional CD4<sup>+</sup> T cell subsets before and after *M. tuberculosis* infection of mice vaccinated with CysVac2/Advax<sup>CpG</sup> either via pulmonary or parenteral route.**

C57BL/6 mice (n=5-6) were vaccinated by either the i.m. or i.t. route with CysVac2 (CV2)/Advax<sup>CpG</sup> (3 times, 2 weeks apart). One week after last vaccination mice were bled for vaccine immunogenicity assessment. Six weeks after last immunization mice were challenged with H37Rv by aerosol (~100 CFU) and four weeks later culled to enumerate bacterial burden and T cell phenotype in the lung. PBMCs (one week after last vaccination, panel a) and lung cells 4-weeks p.i. (panel b) were restimulated with CysVac2 fusion protein, and analysed for intracellular expression of IFN-γ, IL-2, IL-17, and TNF by flow cytometry. Boolean gating analysis was performed to identify subsets of CD4<sup>+</sup> T cells expressing different combinations of these cytokines. Data is representative of 2 independent experiments. Significance difference between the groups was determined by ANOVA (\*p<0.05; \*\*p<0.01).

**S2 Figure. Comparative analysis of lung multifunctional CD4<sup>+</sup> T cell subsets after *M. tuberculosis* infection of mice vaccinated via pulmonary route with either CysVac2/Advax or CysVac2/Advax<sup>CpG</sup>.**

C57BL/6 mice (n=5-6) were vaccinated by i.t. route with either CysVac2 (CV2)/Advax or CysVac2 (CV2)/Advax<sup>CpG</sup> (3 times, 2 weeks apart). Six weeks after last immunization mice were challenged with H37Rv by aerosol (~100 CFU), and four weeks later culled to enumerate bacterial burden and T cell phenotype in the lung. Lung cells 4 weeks p.i. were restimulated with CysVac2 fusion protein,

and analysed for intracellular expression of IFN- $\gamma$ , IL-2, IL-17, and TNF by flow cytometry. Boolean gating analysis was performed to identify subsets of CD4<sup>+</sup> T cells expressing different combinations of these cytokines. Data is representative of 2 independent experiments. Significance difference between the groups was determined by ANOVA (\*p < 0.05; \*\*p < 0.01).

**S3 Figure. tSNE expression of markers in the lung of mice after *M. tuberculosis* infection and anti-IL-17 mAb treatment.** Example of tSNE dimension 1 and 2 plots of the lung compartment show relative expression intensity of each indicated phenotypic marker. tSNE heat maps show fluorescent intensity of each marker for each event. Scales on the heat maps are individually generated for each surface marker from low to high expression. (Ashhurst, T. M. 2017, tSNEplots v1.3. GitHub repository).

**S4 Figure. Effects of blocking IL-17 during *M. tuberculosis* infection on CD4<sup>+</sup> T cells proliferation in the lung.**

C57BL/6 mice (n=5-6) were vaccinated i.t. with CysVac2/Advax and treated i.p. with anti-IL-17 mAb, as described in Figure 5. Representative dot plot of the expression of Ki67 and ROR $\gamma$ T on CD4<sup>+</sup> T cells from the lung (a). Bar graphs showing numbers of total (b) and Ror $\gamma$ T<sup>+</sup> (c) proliferating CD4<sup>+</sup> T cells enumerated in the lung. Representative dot plots show CD44 and either Ag85B:I-Ab or ESAT6:I-Ab staining on CD4<sup>+</sup> T cells in the lung (d), with total number  $\pm$  SEM of Ag85B:I-Ab<sup>+</sup> (e) and ESAT6:I-Ab<sup>+</sup> (f) CD4<sup>+</sup> T cells in the lung. Data are pooled of 2 independent experiments. Significance of differences between the groups was determined by ANOVA (\*p<0.05; \*\*\*p<0.001; NS=not significant).

**S1 Table. List of antibodies used.**



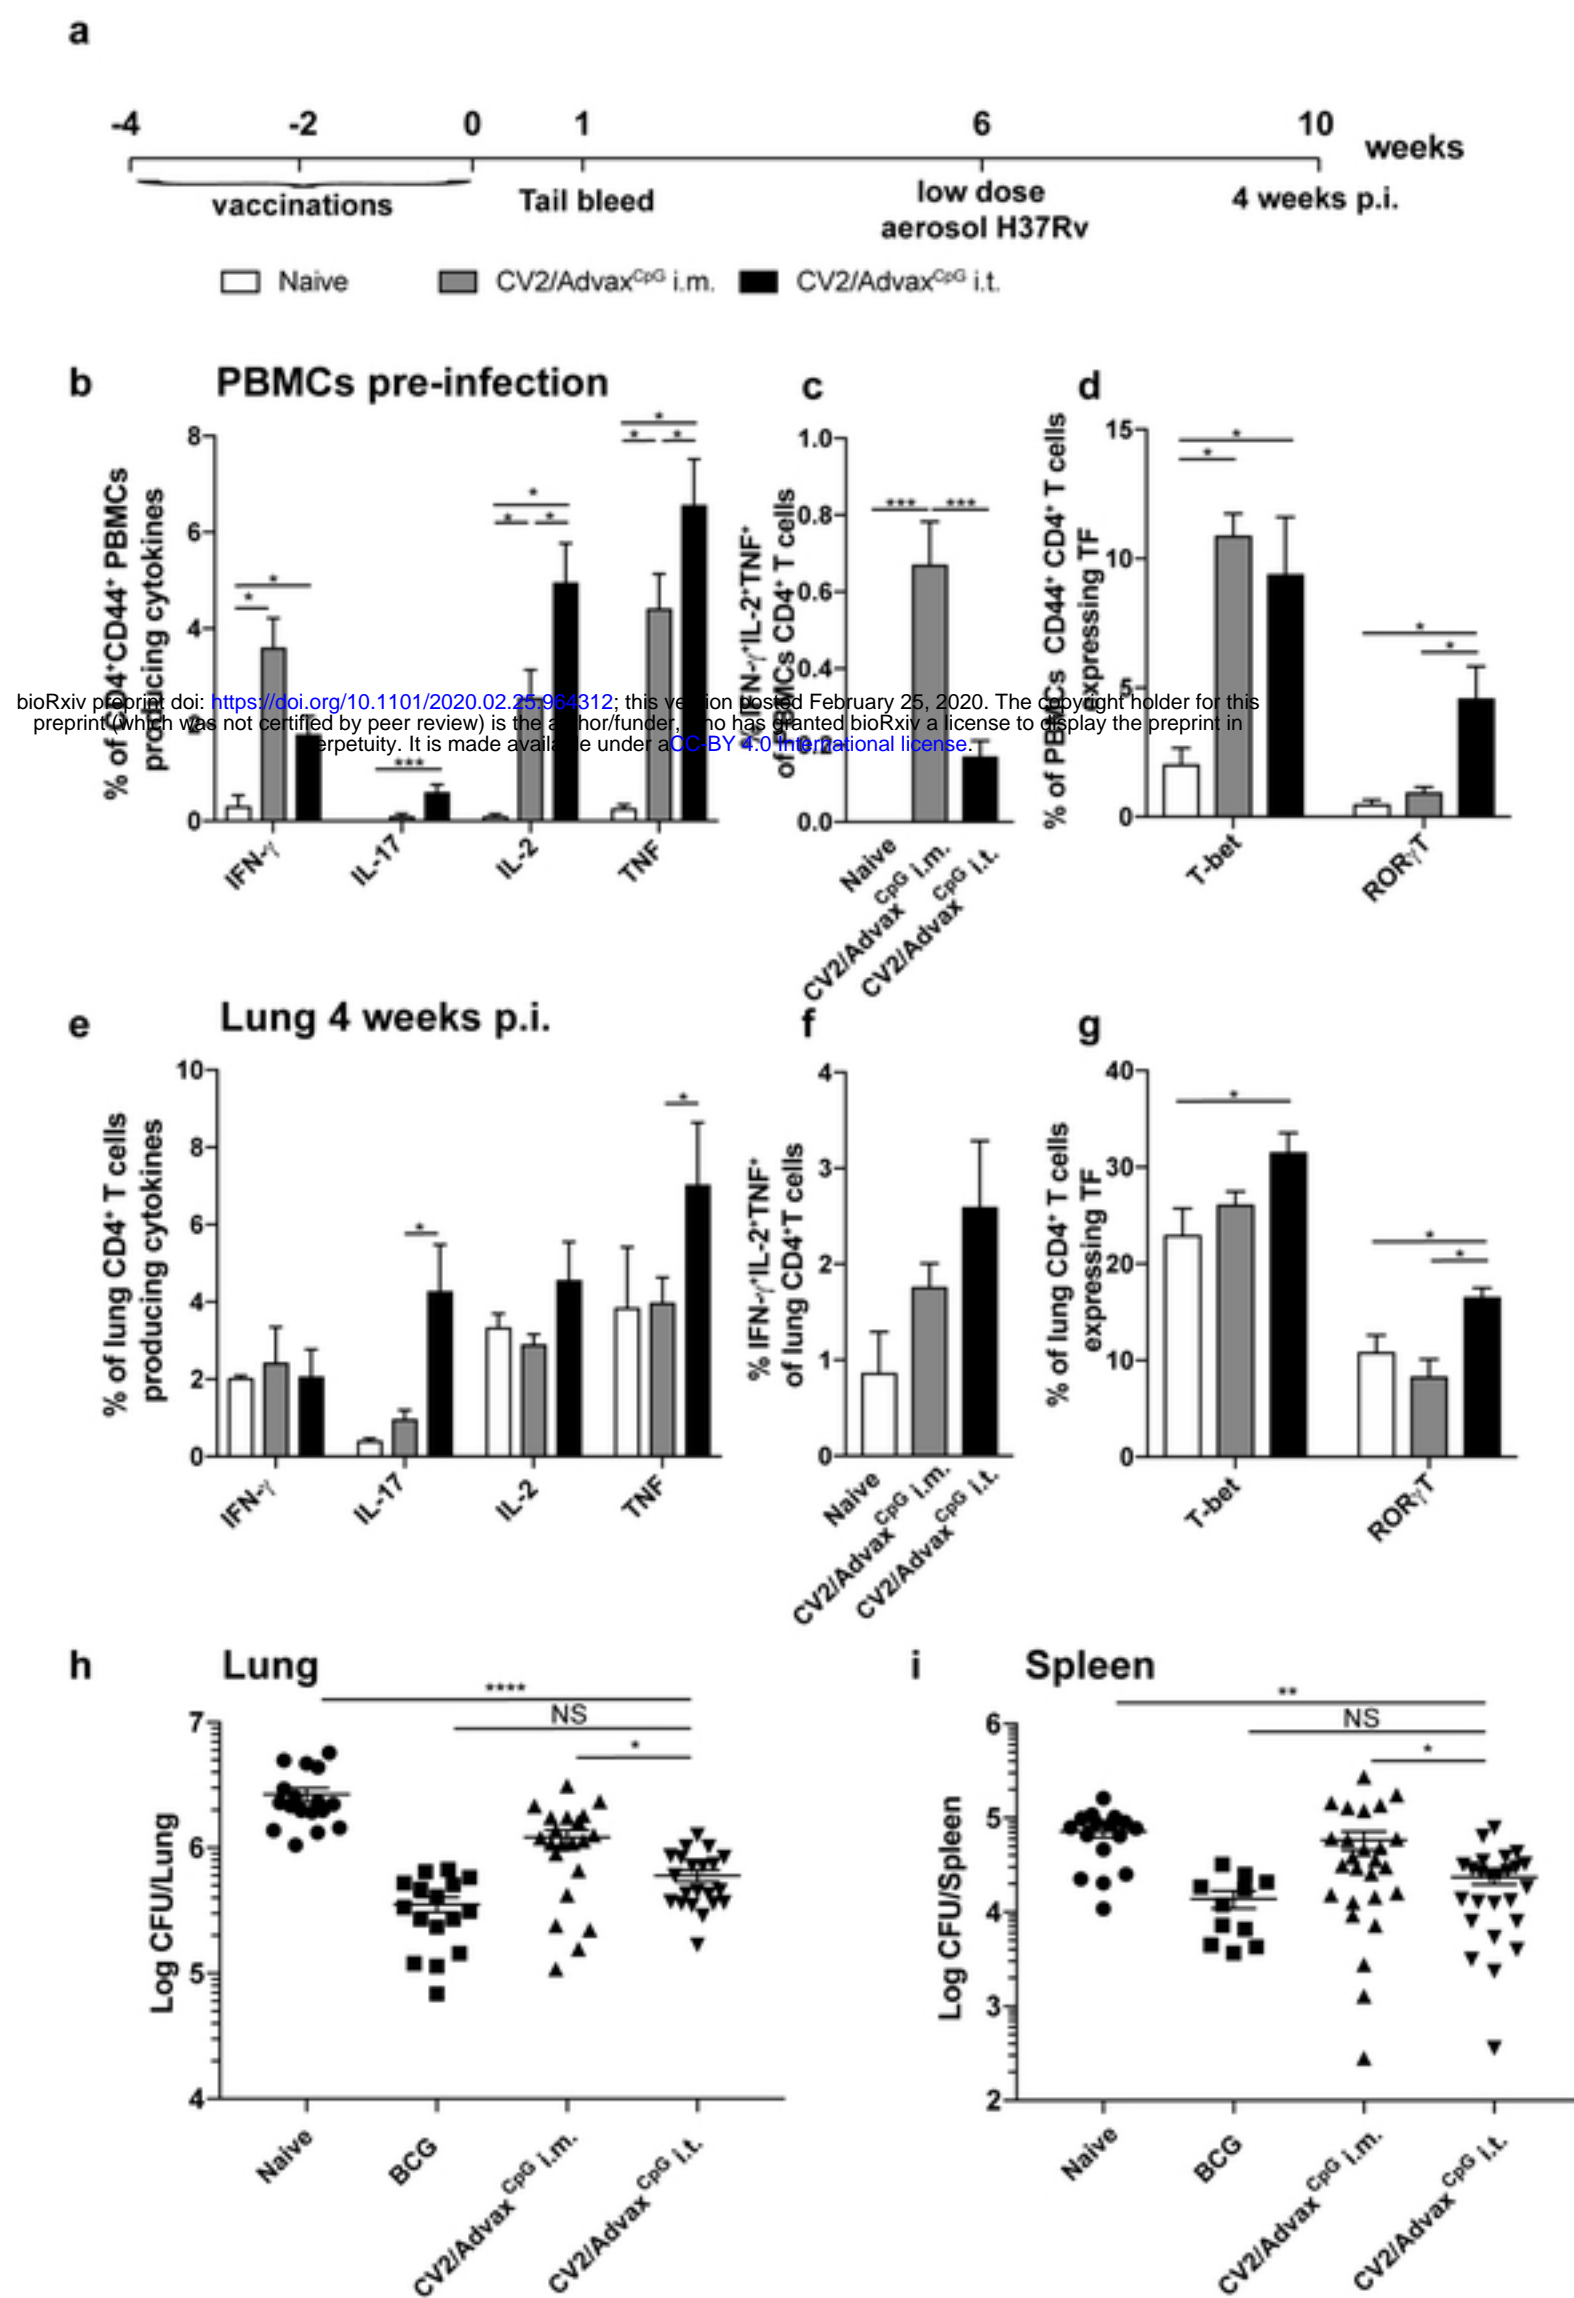

Figure 1, Counoupas *et al*

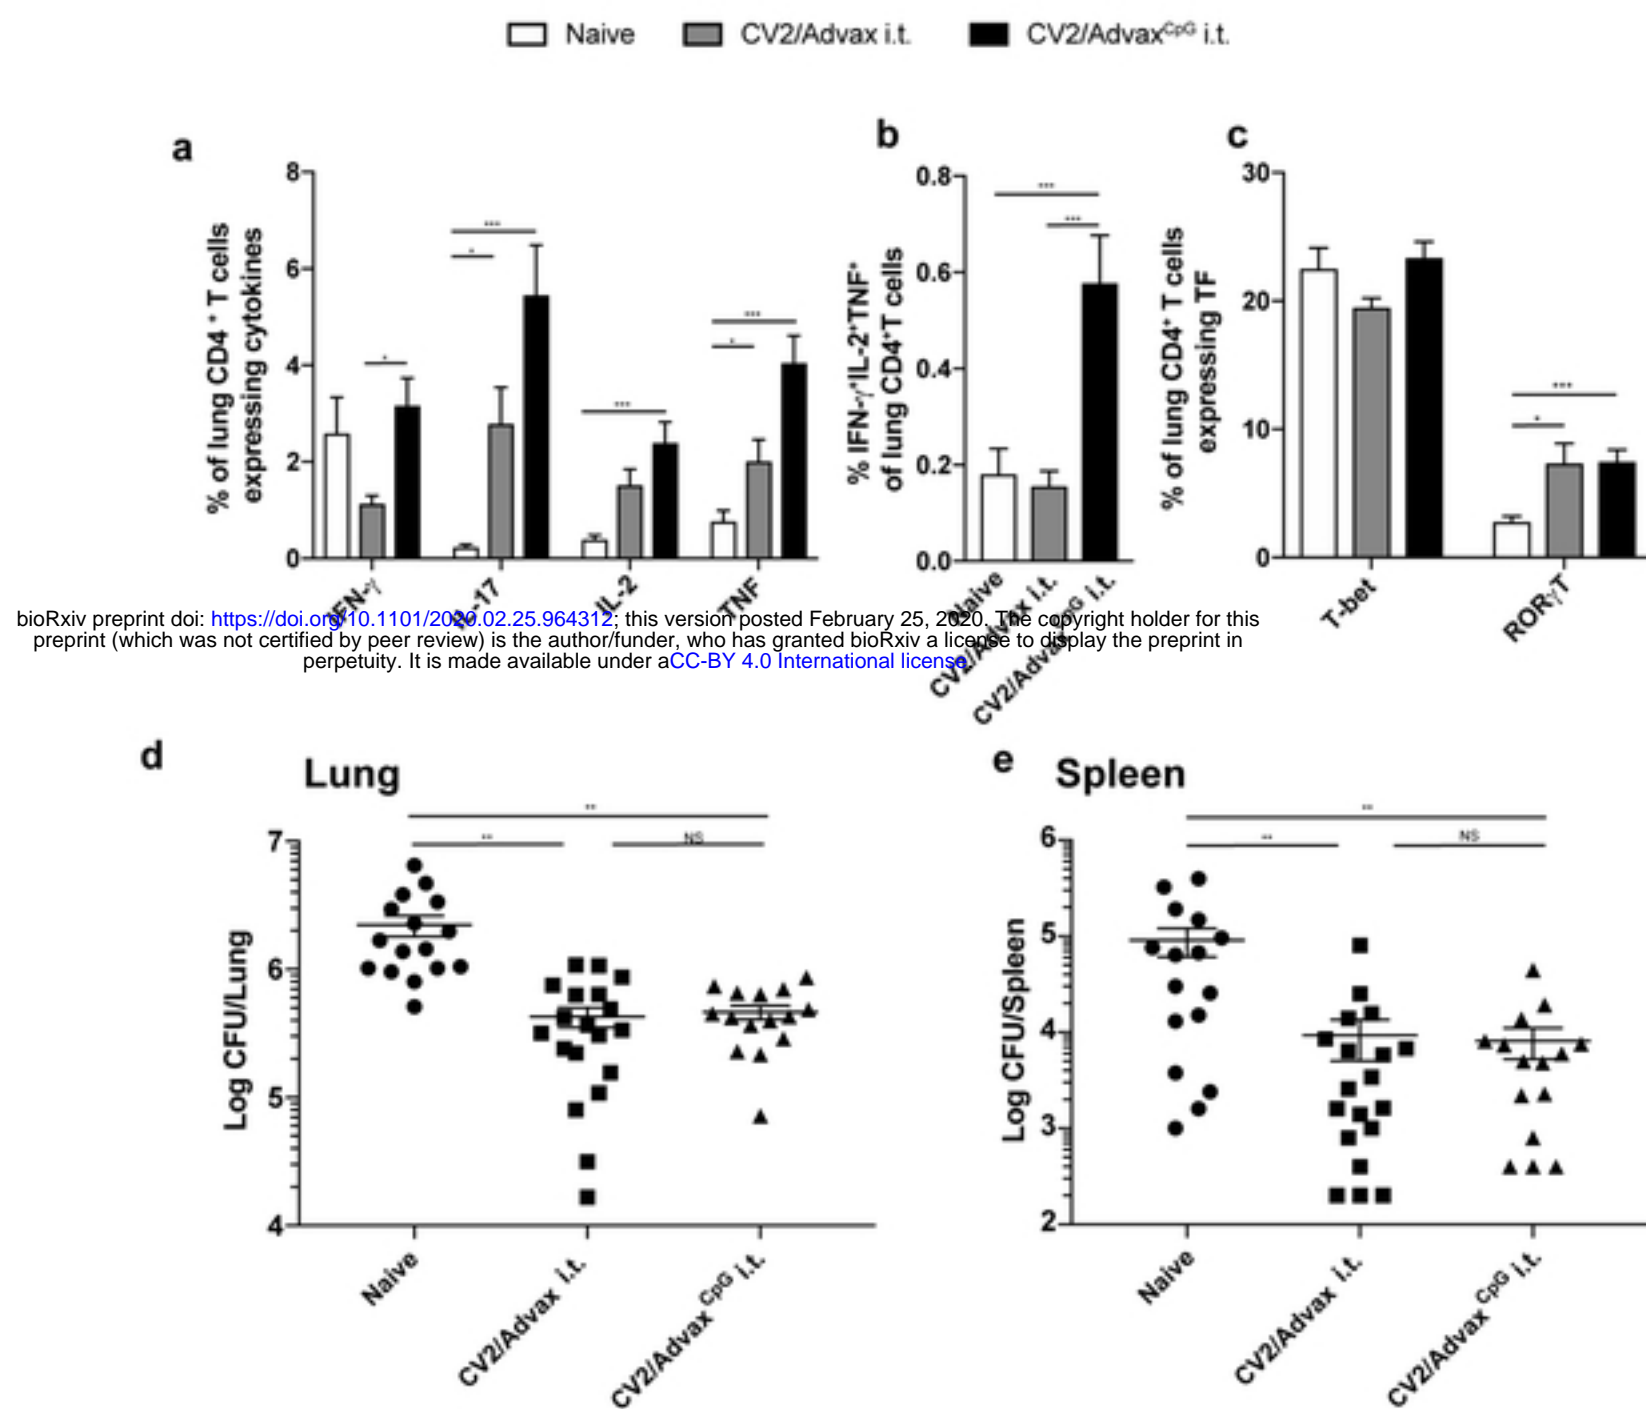

Figure 2, Counoupas *et al*

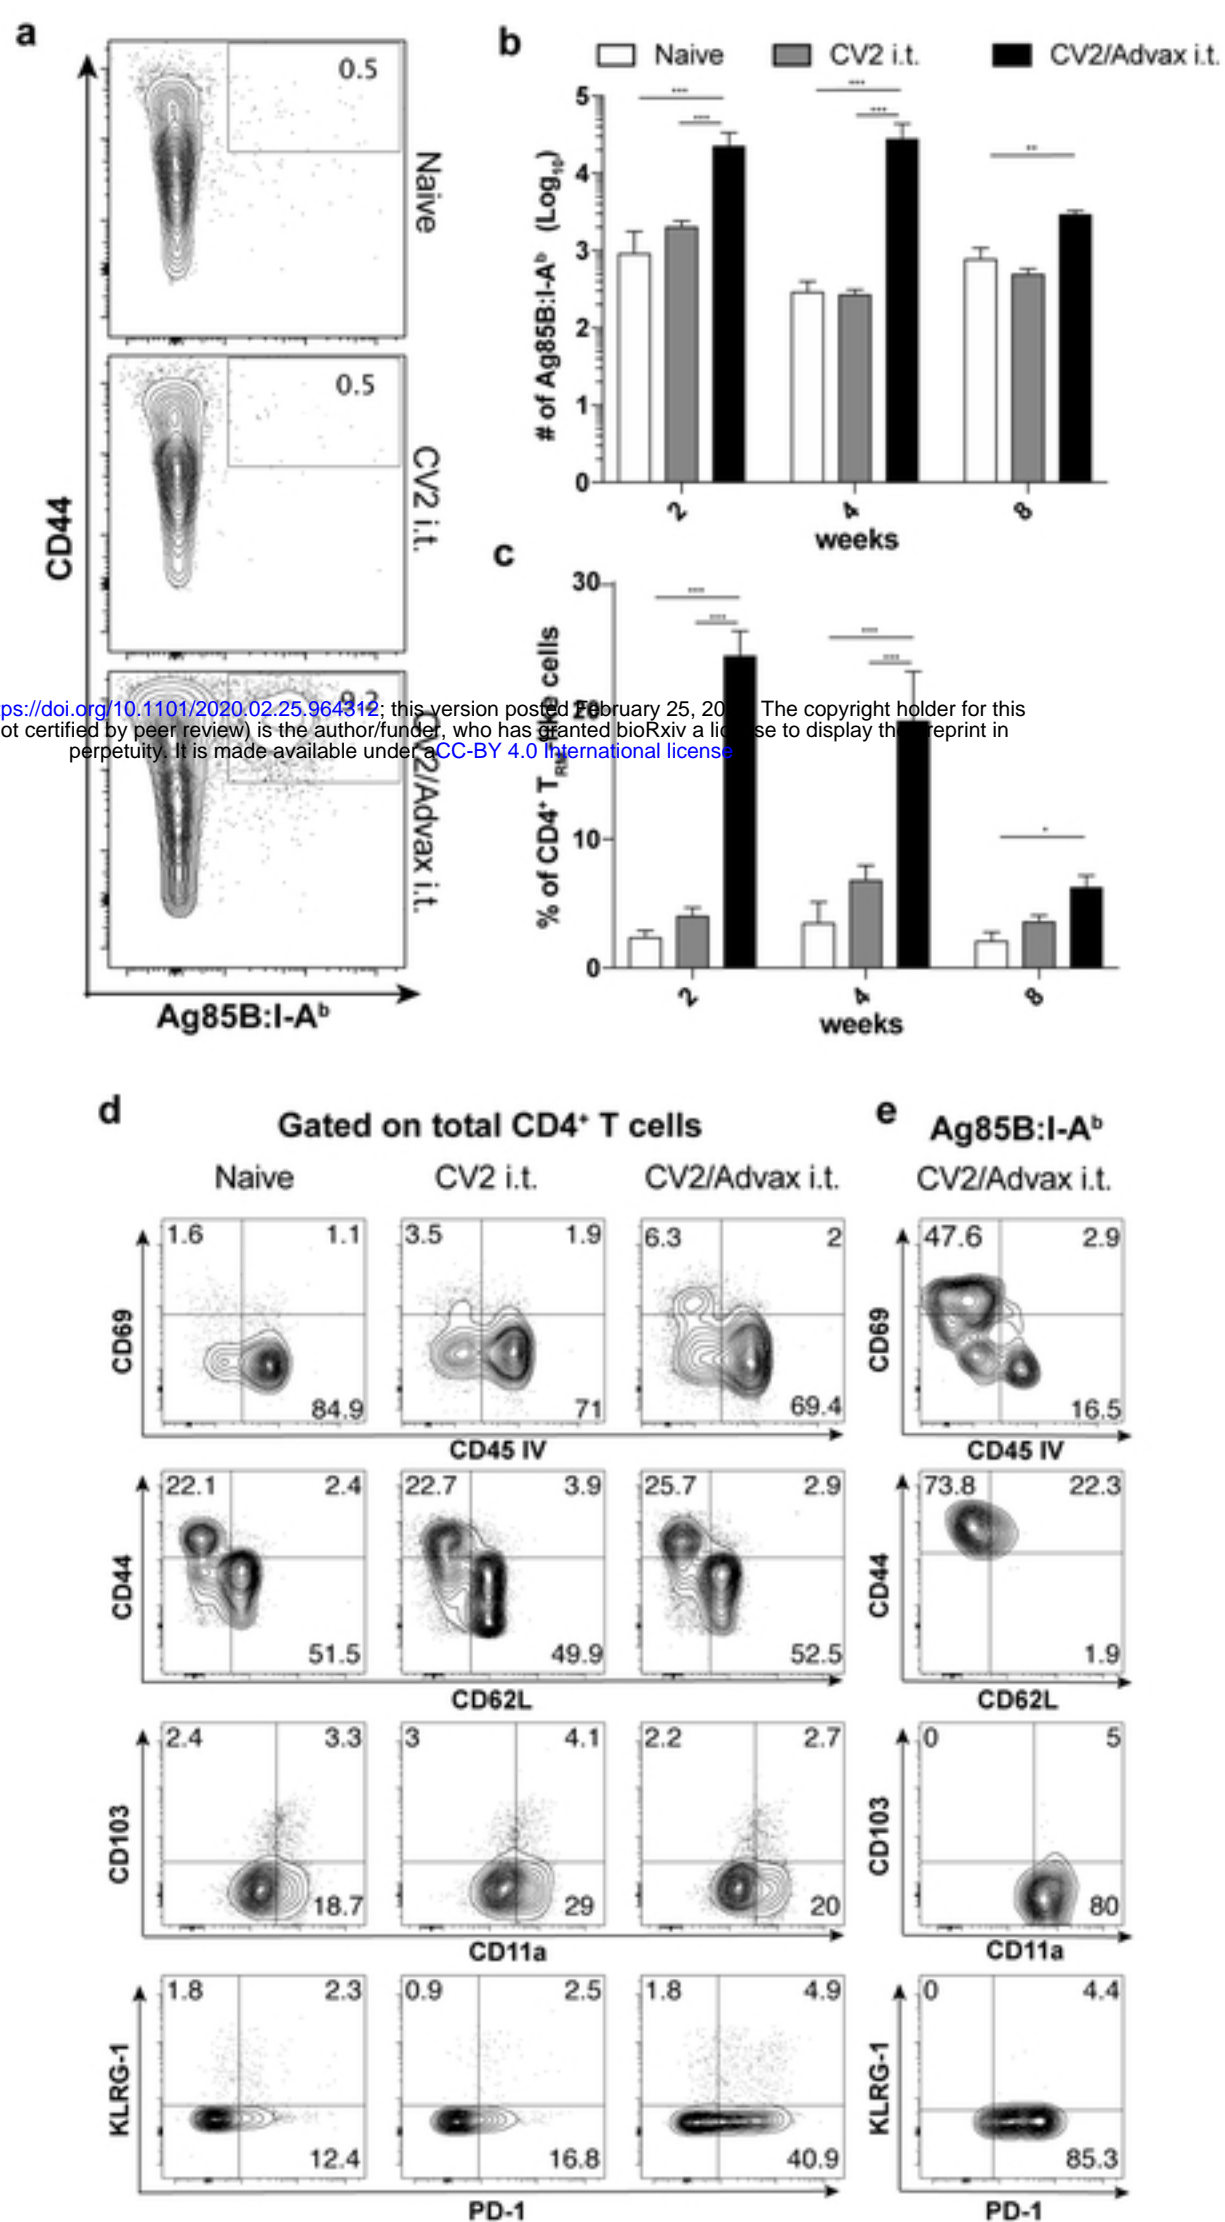

Figure 3, Counoupas *et al*

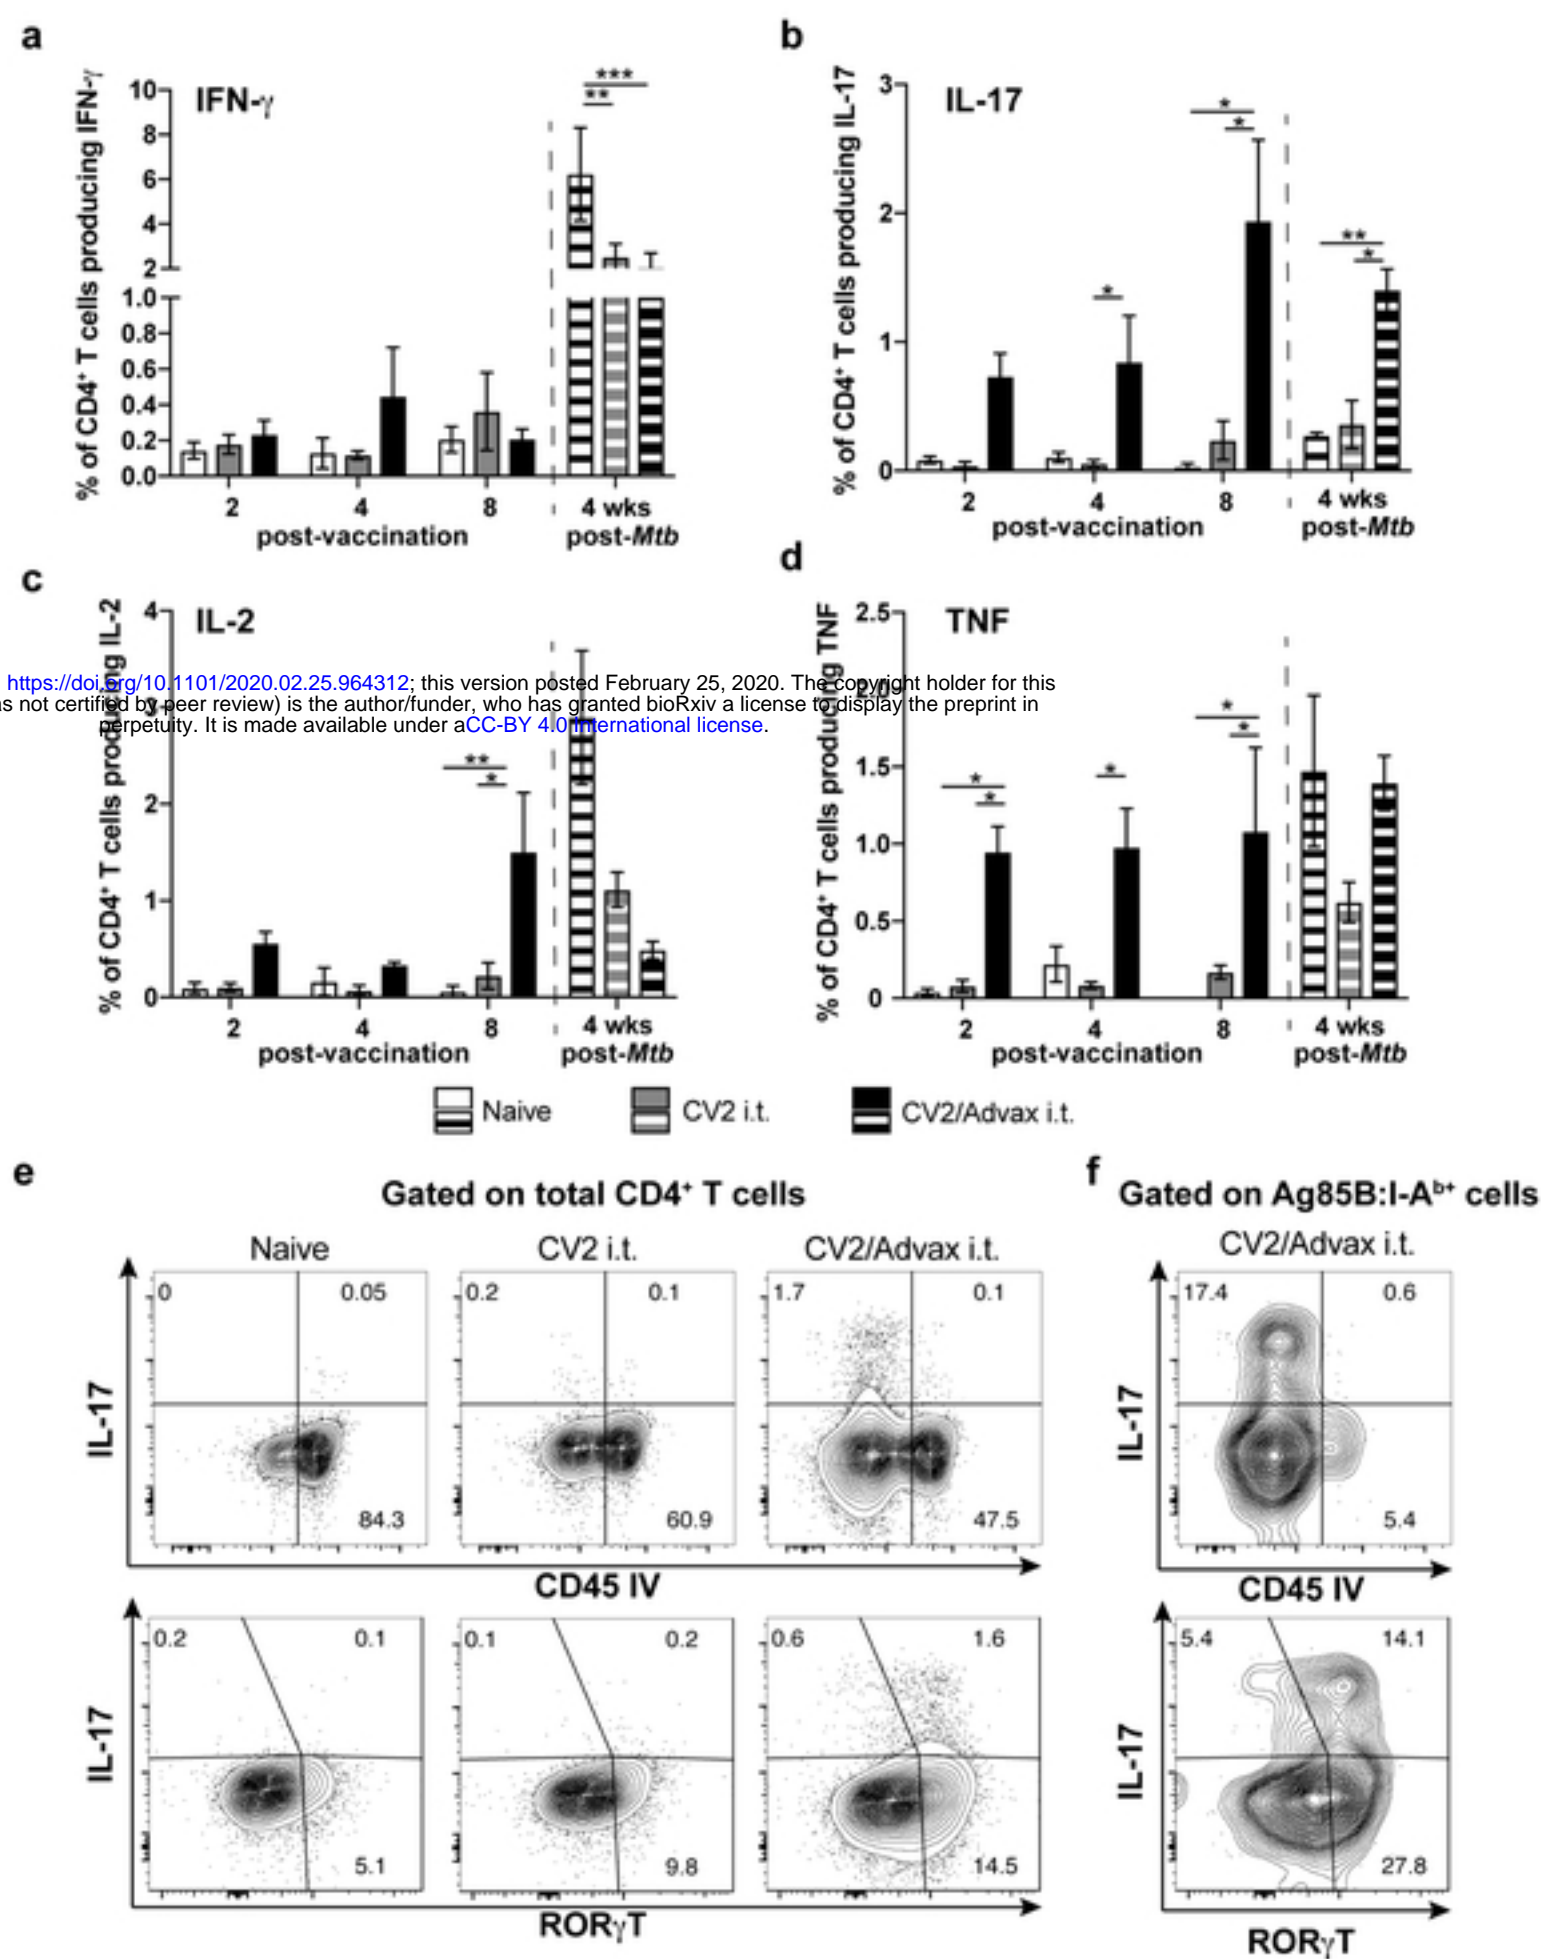

Figure 4, Counoupas *et al*



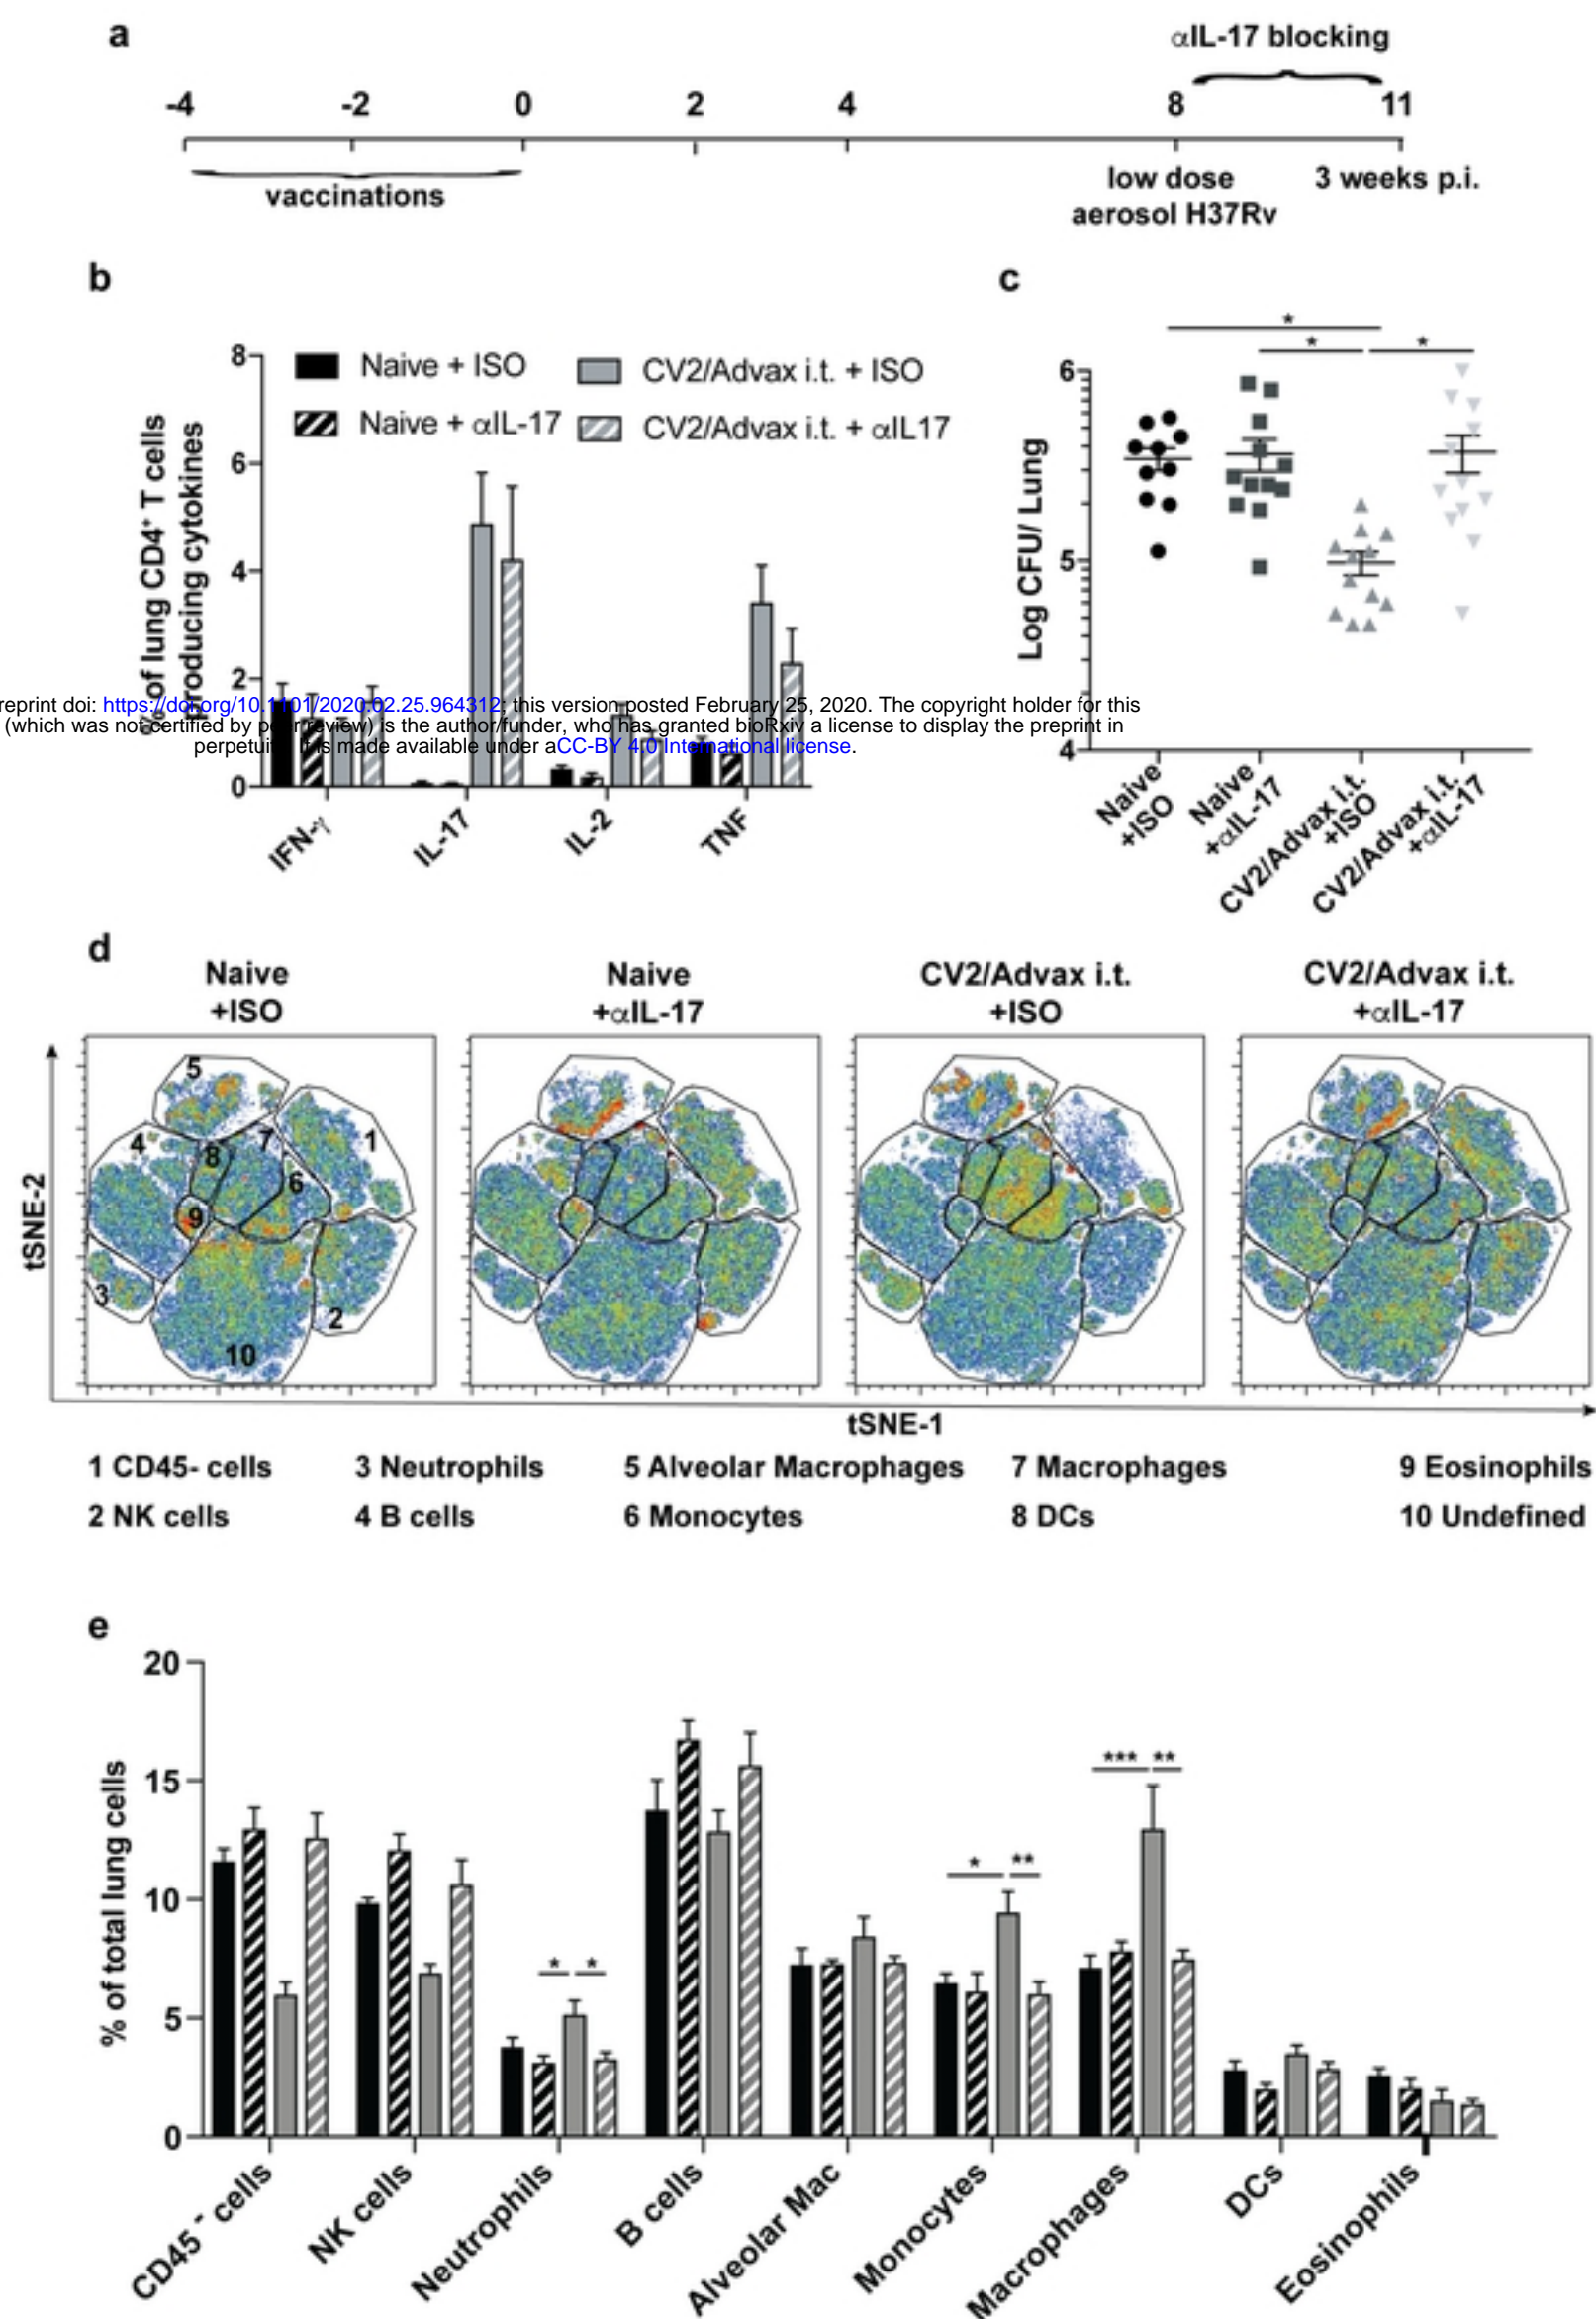

Figure 5, Counoupas *et al*

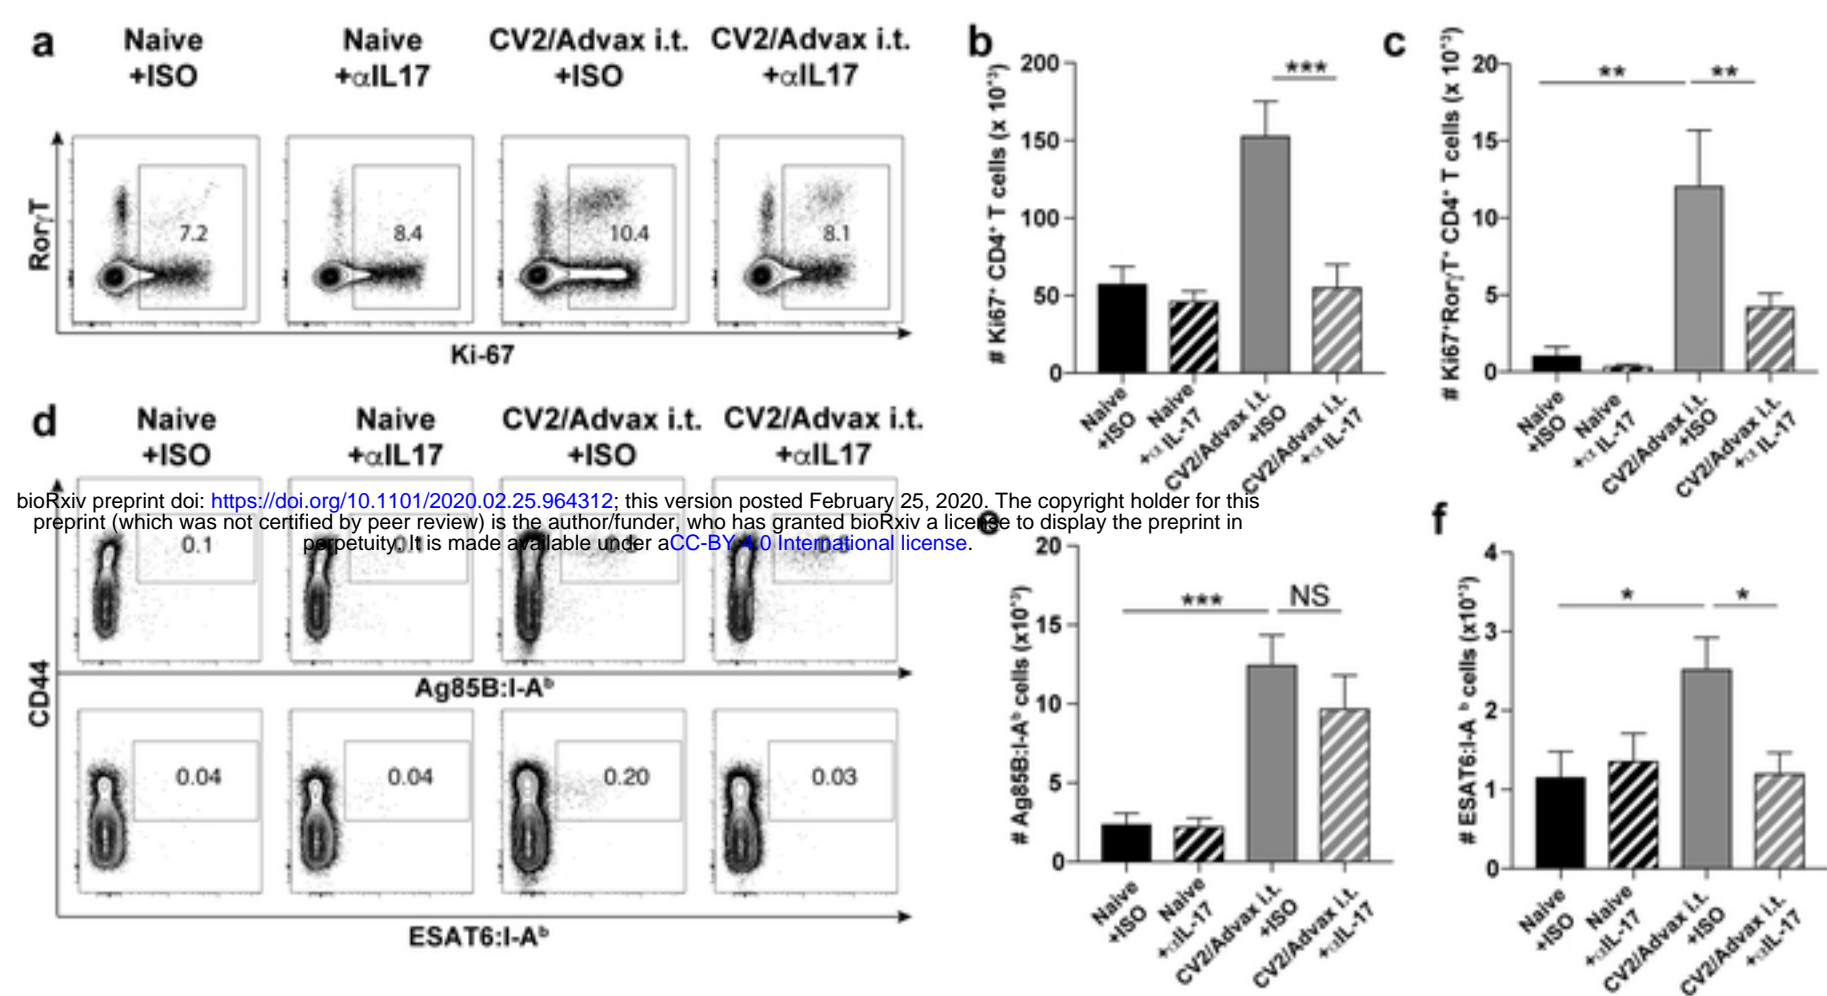

Figure 6, Counoupas *et al*

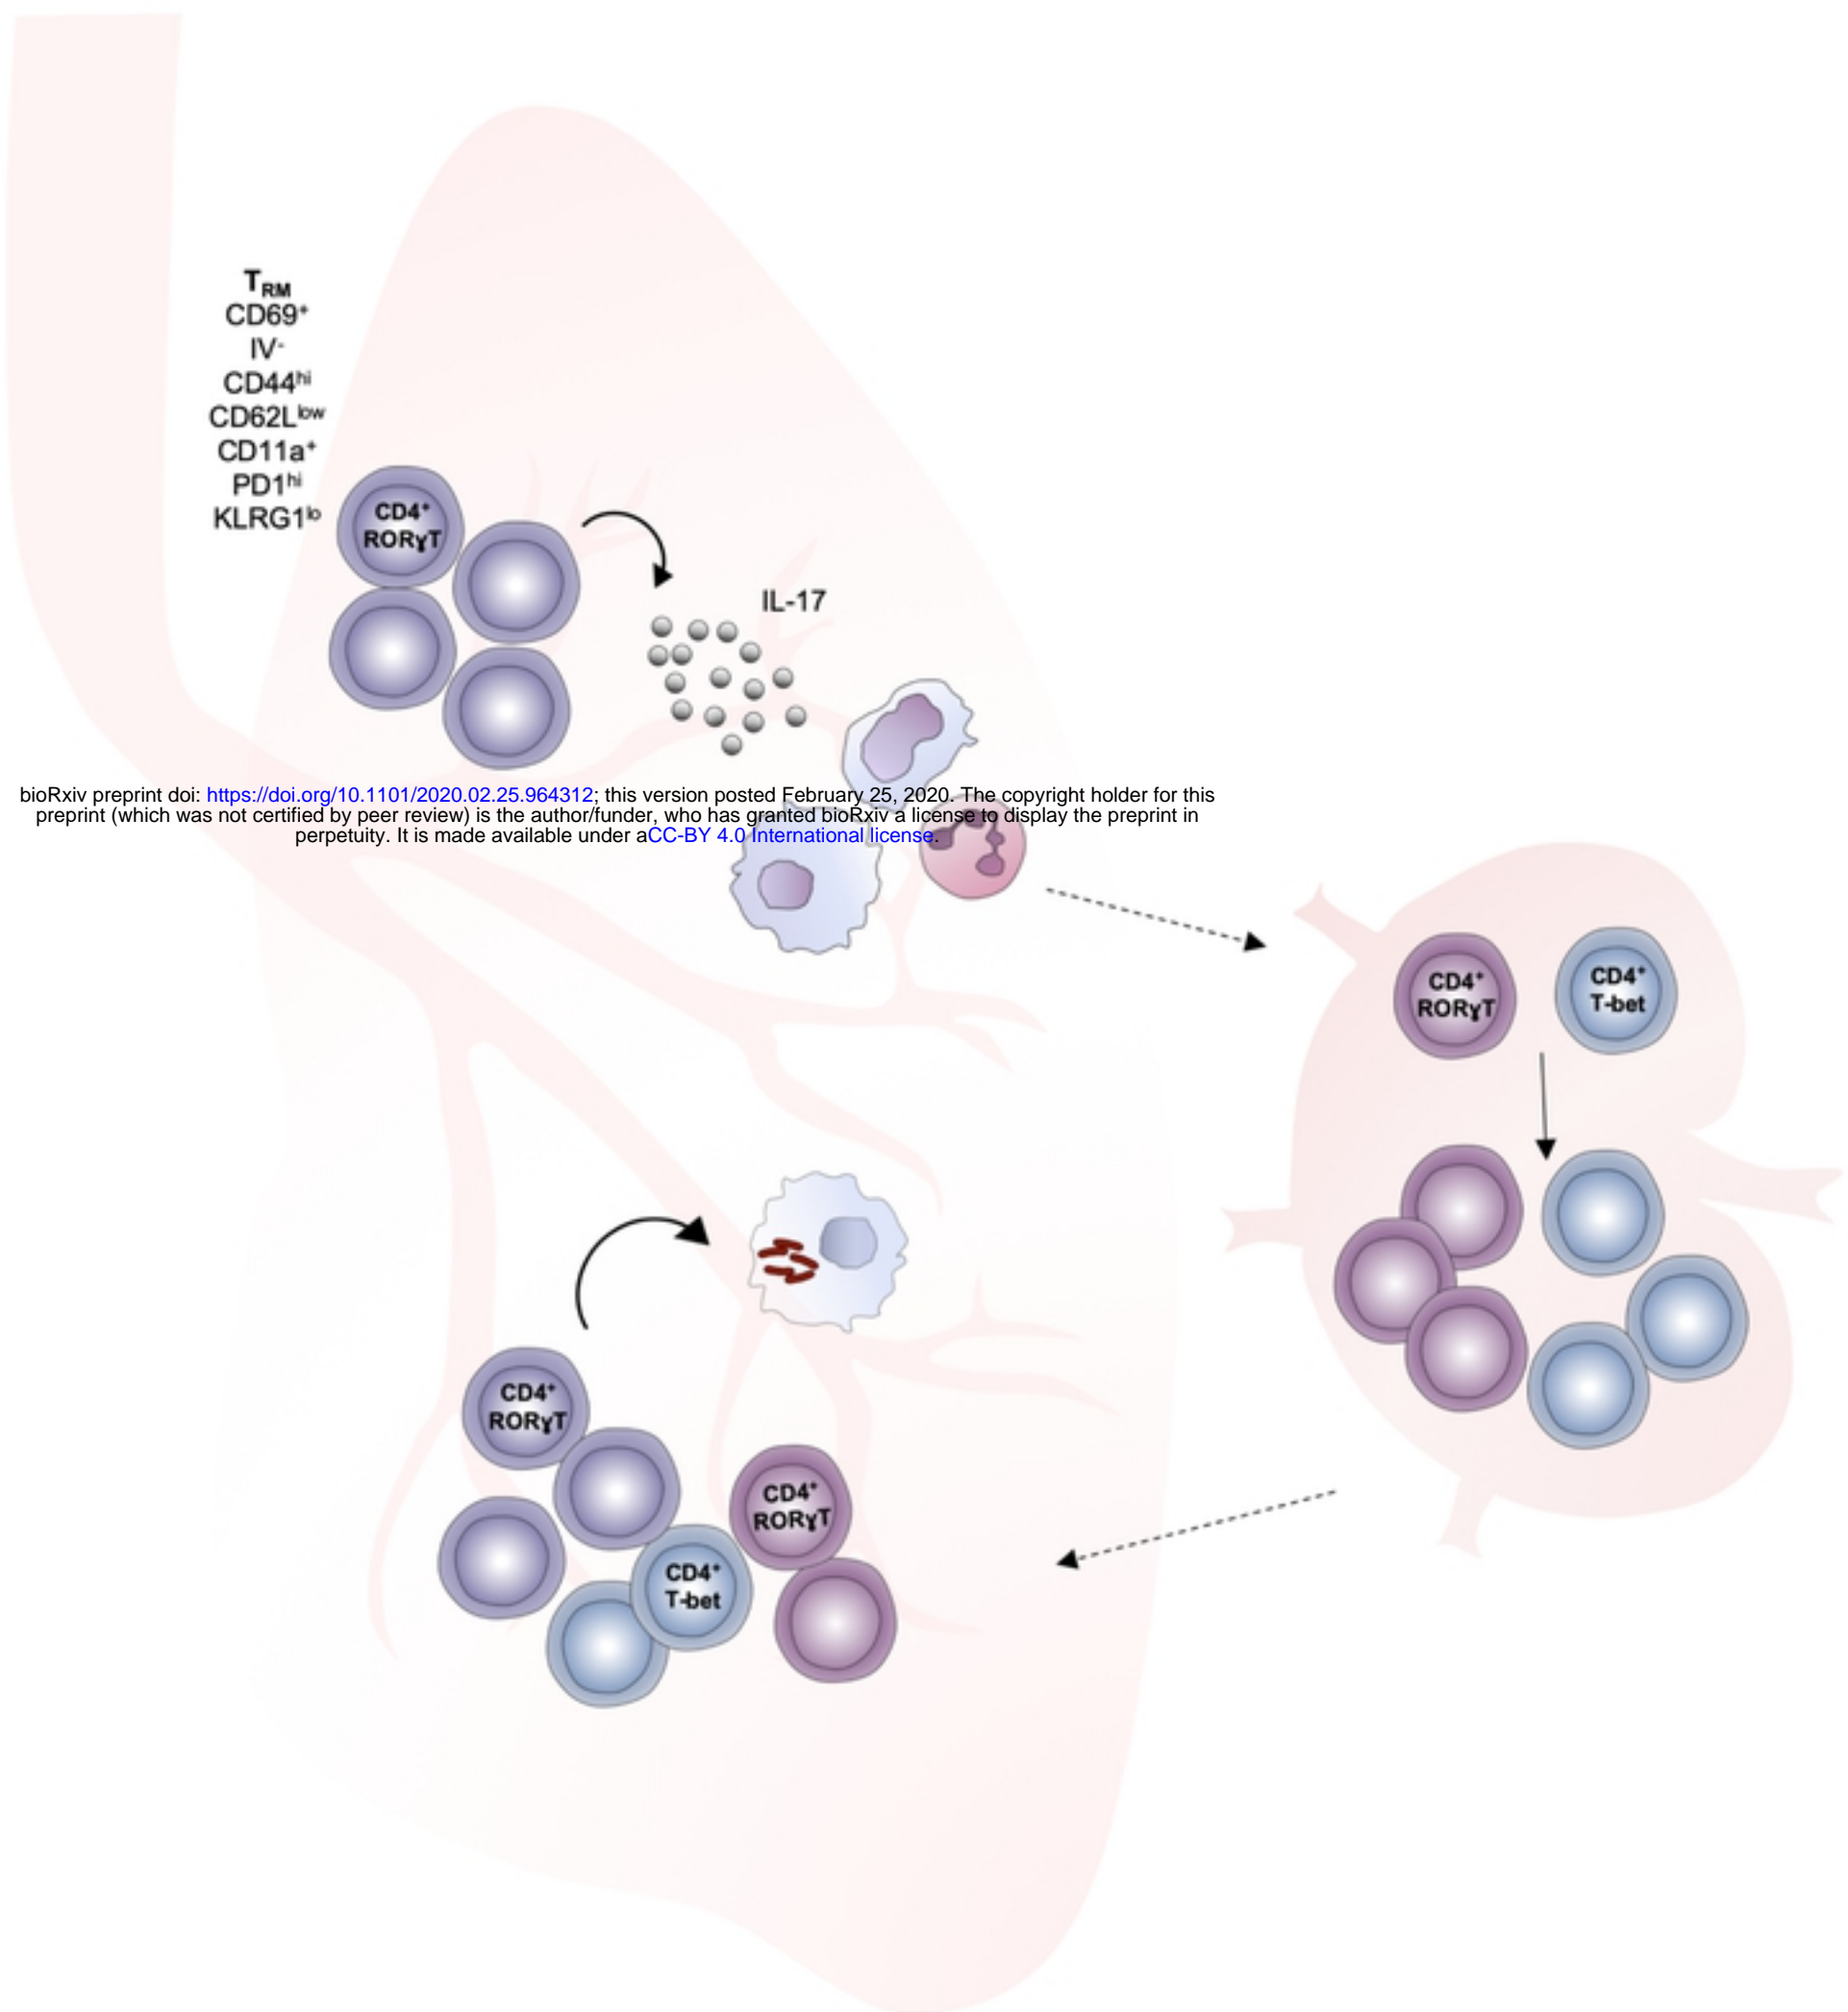

bioRxiv preprint doi: <https://doi.org/10.1101/2020.02.25.964312>; this version posted February 25, 2020. The copyright holder for this preprint (which was not certified by peer review) is the author/funder, who has granted bioRxiv a license to display the preprint in perpetuity. It is made available under aCC-BY 4.0 International license.

Figure 7, Counoupas *et al*
