1       **Mucosal delivery of a multistage subunit vaccine promotes development of lung-resident**  
2               **memory T cells and affords interleukin-17-dependant protection against pulmonary**  
3                               **tuberculosis**

4  
5  
6   Claudio Counoupas<sup>1,2,3\*</sup>, Kia Ferrell<sup>1,2</sup>, Anneliese Ashhurst<sup>1,3</sup>, Nayan Bhattacharyya<sup>1,2,3</sup>, Gayathri  
7   Nagalingam<sup>1,3</sup>, Carl G. Feng<sup>1,2</sup>, Nikolai Petrovsky<sup>4</sup>, Warwick J. Britton<sup>1,3</sup>, James A. Triccas<sup>1,2,3,5\*</sup>

8  
9   <sup>1</sup>Discipline of Infectious Diseases and Immunology, Faculty of Medicine and Health, The  
10   University of Sydney, Camperdown, NSW, Australia

11   <sup>2</sup>Charles Perkins Centre, The University of Sydney, Camperdown, NSW, Australia

12   <sup>3</sup>Tuberculosis Research Program Centenary Institute, The University of Sydney, Camperdown,  
13   NSW, Australia

14   <sup>4</sup>Vaxine Pty Ltd, 11 Walkley Avenue, Warradale and Flinders University, Adelaide, Australia

15   <sup>5</sup>Marie Bashir Institute for Infectious Diseases and Biosecurity, The University of Sydney,  
16   Camperdown, NSW, Australia

17

18

19

20

21   \*Corresponding authors

22   E-mail: [claudio.counoupas@sydney.edu.au](mailto:claudio.counoupas@sydney.edu.au) (CC)

23   E-mail: [jamie.triccas@sydney.edu.au](mailto:jamie.triccas@sydney.edu.au) (JAT)

24

25

26

27 **Abstract**

28 The development of effective vaccines against bacterial lung infections requires the induction of  
29 protective, pathogen-specific immune responses without deleterious inflammation within the  
30 pulmonary environment. Here, we made use of a polysaccharide-adjuvanted vaccine approach to  
31 elicit resident pulmonary T cells to protect against aerosol *Mycobacterium tuberculosis* infection.  
32 Intratracheal administration of the multistage fusion protein CysVac2 and the delta-inulin adjuvant  
33 Advax™ (formulated with a TLR9 agonist) provided superior protection against aerosol *M.*  
34 *tuberculosis* infection in mice, compared to parenteral delivery. Surprisingly, removal of the TLR9  
35 agonist did not impact vaccine protection despite a reduction in cytokine-secreting T cell subsets,  
36 particularly CD4<sup>+</sup> IFN-γ<sup>+</sup>IL-2<sup>+</sup>TNF<sup>+</sup> multifunctional T cells. CysVac2/Advax-mediated protection  
37 was associated with the induction of lung-resident, antigen-specific memory CD4<sup>+</sup> T cells that  
38 expressed IL-17 and RORγt, the master transcriptional regulator of Th17 differentiation. IL-17 was  
39 identified as a key mediator of vaccine efficacy, with blocking of IL-17 during *M. tuberculosis*  
40 challenge reducing phagocyte influx, suppressing priming of pathogen-specific CD4<sup>+</sup> T cells in  
41 local lymph nodes and ablating vaccine-induced protection. These findings suggest that tuberculosis  
42 vaccines such as CysVac2/Advax that are capable of eliciting Th17 lung-resident memory T cells  
43 are promising candidates for progression to human trials.

44

45

46

47 **Importance**

48 *Mycobacterium tuberculosis*, the causative agent of tuberculosis (TB), kills more individuals each  
49 year than any other single pathogen. The only approved vaccine, BCG, administered intradermally,  
50 is unreliable in protecting against pulmonary TB, therefore a more effective vaccine is critical for  
51 global control of the disease. Vaccination in the lung would be a rational way of inducing a local  
52 memory immune response to TB, however vaccine platforms would need to deliver antigens to  
53 delicate mucosal surfaces without inducing deleterious inflammatory responses. We developed a  
54 safe mucosal vaccine which induced protection against TB lung infection in mice by inducing high  
55 levels of lung-resident T cells expressing the cytokine IL-17. Removal of IL-17 limited the influx of  
56 phagocytic cells to the lung and completely ablated protection afforded by the vaccine. This study  
57 provides new insights into mechanisms of protection against *M. tuberculosis* and provides a  
58 promising candidate to protect against TB in humans.

59

60

## 61 **Introduction**

62 Tuberculosis (TB) remains a major cause of morbidity and mortality worldwide, with 10 million  
63 new cases and 1.7 million deaths per year[1]. *Mycobacterium bovis* bacillus Calmette-Guérin (BCG)  
64 is currently the only licensed vaccine against TB, however its efficacy varies greatly, especially  
65 against the adult pulmonary form of the disease[2]. The 2015 WHO End TB Strategy identified the  
66 development of a more effective and easily administered vaccine for controlling TB and halting the  
67 global epidemic[3]. In recent decades, extensive research has resulted in many new TB vaccine  
68 candidate, 14 of which are currently in human vaccine trials and are reviewed in detail elsewhere[4].  
69 Recently, a Phase IIb clinical trial of the fusion protein vaccine M72/AS01<sub>E</sub> showed protective  
70 efficacy of 50% in *M. tuberculosis*-infected adults after 3 years [5, 6]. Although promising,  
71 vaccines with higher efficacy are considered necessary to reduce TB incidence to the targets  
72 outlined in the End TB Strategy objectives[3].

73

74 One of the major limitations of current vaccination strategies is that the administration route may  
75 not be optimal for the induction of immunity at the site of pathogen entry, i.e. the lung. Pulmonary  
76 vaccine delivery has been hindered by the fact that most adjuvants are either unable to induce  
77 sufficient mucosal immunity or are too toxic to be administered to the lung[7]. However, recent  
78 evidence supports the idea that mucosal vaccination may provide superior protection against  
79 respiratory *M. tuberculosis* infection over parenteral vaccination. For example, lung-resident CD4<sup>+</sup>  
80 memory T cells (T<sub>RM</sub>) induced after pulmonary vaccination with a recombinant influenza virus  
81 expressing *M. tuberculosis* antigens provided protection in the lung in the absence of circulating  
82 memory cells[8]. T<sub>RM</sub> have also been proposed as the possible mechanism of protection in  
83 macaques that demonstrate sterilizing immunity after intravenous vaccination with BCG and  
84 subsequent *M. tuberculosis* infection [9]. When administered through the mucosal route, BCG  
85 induced increased protection compared to the intradermal immunization, which was linked to lung  
86 T<sub>RM</sub> and Th17 polarization of the CD4<sup>+</sup> T cells[10]. Th17 responses have been associated with the

87 influx of neutrophils with bactericidal activity[11] and increased CD4<sup>+</sup> T cell recruitment to the  
88 lung after *M. tuberculosis* infection[12]. Vaccines inducing high levels of pulmonary IL-17 have  
89 demonstrated efficacy against *M. tuberculosis* in different animal models[13, 14] although  
90 balancing the protective and pathogenic roles of IL-17 in the lung is a critical consideration[15].

91

92 In this study we sought to determine if the candidate TB vaccine, CysVac2/Advax[16], is effective  
93 as a mucosal vaccine to protect against *M. tuberculosis*. CysVac2 is a fusion protein of two *M.*  
94 *tuberculosis* antigens; the immunodominant Ag85B and CysD, a component of the sulfur  
95 assimilation pathway that is overexpressed in chronic stages of infection [17]. Advax is a particulate  
96 polysaccharide adjuvant with a low inflammatory profile that has proven to be safe and a strong  
97 inducer of vaccine immunogenicity in humans, thus making it an ideal candidate for mucosal  
98 administration[18][19]. Notably, it was recently shown to provide safe and effective enhancement  
99 of influenza vaccine immunity when administered via the intrapulmonary route in different animal  
100 models[20, 21].

101

102 We report here that intrapulmonary administration of CysVac2/Advax induced greater protection in  
103 mice than parenterally administered vaccine, with the vaccine promoting the accumulation of  
104 antigen-specific, IL-17-secreting CD4<sup>+</sup> T<sub>RM</sub> in the lungs. Furthermore, IL-17 was essential for the  
105 protective efficacy afforded by intrapulmonary CysVac2/Advax vaccine, thus defining a crucial  
106 role for this cytokine in vaccine-mediated control of TB.

107

108

109 **Results**

110 **Pulmonary administration of CysVac2/Advax<sup>CpG</sup> provides superior protection against *M.***  
111 ***tuberculosis* challenge than parenteral vaccination**

112 Previous studies of intramuscular (i.m.) vaccination of mice with CysVac2/Advax<sup>CpG</sup> demonstrated  
113 substantially enhanced systemic CD4<sup>+</sup> T cell responses composed of multifunctional Th1 polarized  
114 cells, which correlated with protection against aerosol *M. tuberculosis* infection[16]. In this study,  
115 we evaluated if delivery to the lung by intratracheal (i.t.) instillation of this vaccine candidate could  
116 improve the level of protection induced by this vaccine. Mice were vaccinated by either the i.t. or  
117 i.m. routes with CysVac2/Advax<sup>CpG</sup> 3 times, 2 weeks apart (Fig 1a). When the vaccine-specific T  
118 cell response was examined in the blood prior to *M. tuberculosis* challenge, a higher level of  
119 circulating polyfunctional CD4<sup>+</sup> T cells expressing IFN- $\gamma$  were present after i.m. vaccination (Fig  
120 1b, S1a Fig), with the most prominent phenotype identified as multi-cytokine secreting CD44<sup>+</sup>  
121 CD4<sup>+</sup> T cells (Fig 1c). After i.t. vaccination with CysVac2/Advax<sup>CpG</sup>, PBMC-derived CD4<sup>+</sup> T cell  
122 expressing either IL-2, TNF or IL-17 were more prominent when compared to the i.m. route (Fig  
123 1b). Both vaccination regimens induced similar proportions of T-bet expression in circulating CD4<sup>+</sup>  
124 T cells, however i.t. vaccination induced a higher proportion of cells expressing ROR $\gamma$ T (Fig 1d).

125

126 The pattern of CD4<sup>+</sup> T cells immune responses pre-*M. tuberculosis* challenge was compared to that  
127 after *M. tuberculosis* infection. In i.m. vaccinated mice, the greatest frequency of CD4<sup>+</sup> T cells  
128 observed were those secreting IFN- $\gamma$  or TNF (Fig 1e) and this was dominated by cells with a  
129 polyfunctional Th1 responses (IFN- $\gamma$ <sup>+</sup>IL-2<sup>+</sup>TNF<sup>+</sup>, Fig 1f). I.t. vaccination with CysVac2/Advax<sup>CpG</sup>  
130 resulted in a high frequency of CD4<sup>+</sup> T cells secreting either IL-17 or TNF (Fig 1e) or both  
131 cytokines (S1b Fig); these T cell subsets were not observed after i.m. vaccination (Fig 1e, S1 Fig).  
132 Further, the frequency of CD4<sup>+</sup> T cells expressing ROR $\gamma$ T was significantly enhanced after i.t.  
133 vaccination compared to unvaccinated or i.m. vaccinated mice (Fig 1g). Therefore i.t. vaccination

134 of mice with CysVac2/Advax<sup>CpG</sup> results in a Th17-polarized T cell response post-*M. tuberculosis*  
135 exposure, which was not observed after i.m. immunization.

136

137 Considering the differential pattern of immune responses induced by varying the route of  
138 administration of CysVac2/Advax<sup>CpG</sup>, we next determined if this had an impact on protective  
139 efficacy. I.t. vaccinated mice challenged with low dose aerosol *M. tuberculosis*, demonstrated  
140 significantly enhanced lung protection when compared to i.m.-vaccinated or unvaccinated mice (Fig  
141 1h). A similar result was observed in the spleen, suggesting that i.t. vaccination might improve  
142 protection against disseminated infection (Fig 1i). Taken together, these results demonstrate that  
143 pulmonary vaccination with CysVac2/Advax<sup>CpG</sup> induces superior protection compared to i.m.  
144 vaccination and this is associated with an enhanced generation of Th17 cells in the circulation and  
145 in the lung.

146

147 **CpG is dispensable for protection generated by pulmonary vaccination with CysVac2/Advax**  
148 CpG oligonucleotides are TLR9 agonists that help drive Th1 immune responses[22]. While the  
149 CpG component was shown to be important to the protection obtained after CysVac2 i.m.  
150 immunization, we were interested whether a simplified formulation of Advax without the CpG  
151 component would still generate protective pulmonary immunity. CysVac2/Advax or  
152 CysVac2/Advax<sup>CpG</sup> were delivered by the i.t. route, and the mice challenged with aerosol *M.*  
153 *tuberculosis*. Both vaccines resulted in the generation of IL-17-producing CD4<sup>+</sup> T cells following  
154 antigen restimulation *ex vivo* (Fig 2A), however all inflammatory cytokines (IFN- $\gamma$ , IL-17, TNF)  
155 were reduced in Advax-immunized as compared to Advax<sup>CpG</sup>-vaccinated mice (Fig 2a). Strikingly,  
156 the removal of the CpG component resulted in the loss of multifunctional CD4<sup>+</sup> T cells with a triple  
157 cytokine-secreting profile (IFN- $\gamma$ <sup>+</sup>IL-2<sup>+</sup>TNF<sup>+</sup>) (Fig 2b). However, both vaccinated groups displayed  
158 equivalent expression of the transcription factors T-bet or ROR $\gamma$ T (Fig 2c) and similar protection  
159 against *M. tuberculosis* in the lungs (Fig 2c) and spleen (Fig 2d). This indicates that

160 CysVac2/Advax is sufficient for protection and this protection does not correlate with the presence  
161 of multifunctional T cells secreting high levels of inflammatory cytokines.

162

### 163 **Intrapulmonary CysVac2/Advax generates lung-resident, antigen-specific CD4<sup>+</sup> T cells**

164 To more precisely define the vaccine-specific responses after immunization with CysVac2/Advax,  
165 Ag85B:I-A<sup>b</sup> tetramer staining was employed to identify CD4<sup>+</sup> T cells specific for the p25 epitope of  
166 Ag85B, an antigenic component of CysVac2[17]. Ag85B tetramer-positive (Ag85Btet<sup>+</sup>) cells in the  
167 lungs were only detected after i.t. delivery of CysVac2/Advax and not after CysVac2 antigen alone,  
168 confirming the critical role of Advax in inducing antigen-specific T cell expansion (Fig 3a).  
169 Ag85Btet<sup>+</sup> cells were present in significantly greater numbers in CysVac2/Advax vaccinated  
170 samples at all timepoints examined, although numbers contracted by 8 weeks post-vaccination (Fig  
171 3b). CysVac2/Advax-vaccinated mice showed enrichment of lung parenchymal-residing  
172 (intravascular negative IV<sup>-</sup>) CD4<sup>+</sup> T cells, which expressed CD69 and CD44 with low level of  
173 expression of the lymphoid homing receptor, L-selectin (CD62L) (Fig 3d). This population of  
174 CD4<sup>+</sup>CD44<sup>hi</sup>CD62L<sup>low</sup>CD69<sup>+</sup> IV<sup>-</sup> were defined as T<sub>RM</sub>-like cells[23] and were significantly greater  
175 at all times points post-vaccination in CysVac2/Advax-vaccinated mice, comprising approximately  
176 25% of total CD4<sup>+</sup> T cells in the lung following vaccination (Fig 3c). The majority of Ag85B-tet<sup>+</sup>  
177 cells detected at 8 weeks post vaccination showed a T<sub>RM</sub>-like phenotype and were present within the  
178 parenchyma of the lung (Fig 3e). Along with T<sub>RM</sub> markers, this subset expressed high levels of the  
179 integrin CD11a and the cell surface receptor PD-1, with low levels of expression of CD103 and  
180 KLRG-1 (Fig 3e). Taken together, these data indicate that CysVac2/Advax vaccination induces a  
181 population of antigen-specific CD4<sup>+</sup> T cells in the lung with a T<sub>RM</sub> phenotype, and these are  
182 detectable through 8 weeks post vaccination.

183

184 We further characterized the ability of the CD4<sup>+</sup> T cells generated in the lung to produce cytokines  
185 in response to re-stimulation with vaccine antigen at time points after vaccination (pre-challenge) as



186 well as at 4 weeks post-challenge with *M. tuberculosis*. Intratracheal CysVac2/Advax vaccination  
187 induced a distinct cytokine profile that was relatively consistent across all time points prior to *M.*  
188 *tuberculosis* infection. While a marginal increase in IFN- $\gamma$  production was observed at 4 weeks post  
189 vaccination, this was not apparent at any other time point (Fig 4a). Indeed, following infection with  
190 *M. tuberculosis*, a lower percentage of IFN- $\gamma$ -producing CD4<sup>+</sup> T cells was present in  
191 CysVac2/Advax vaccinated lung samples compared with samples from unvaccinated animals. By  
192 contrast, percentages of IL-2, IL-17 or TNF cytokine-producing cells were markedly increased  
193 after i.t. vaccination with CysVac2/Advax compared to unvaccinated or CysVac2 vaccinated mice  
194 up to 8 weeks post-vaccination (Fig 4b, 4c, 4d), however only IL-17 remained elevated post-  
195 challenge (Fig 4b). Further analysis revealed that the major source of IL-17 originated from CD45  
196 IV<sup>-</sup>CD4<sup>+</sup> T cells that expressed ROR $\gamma$ T (Fig 4e). Furthermore, the Ag85Btet<sup>+</sup> population was highly  
197 enriched in ROR $\gamma$ T<sup>+</sup> CD45 IV<sup>-</sup>IL-17<sup>+</sup>CD4<sup>+</sup> T cells (Fig 4f). Overall, these data suggest that  
198 pulmonary vaccination with CysVac2/Advax promotes increased single and multifunctional  
199 cytokine producing T cell populations both before and after aerosol challenge with *M. tuberculosis*,  
200 which is characterized by the development of a tissue-resident Th17-type response.

201

### 202 **IL-17-mediated protection correlates with early recruitment of phagocytic cells and enhanced** 203 **priming of pathogen-specific CD4<sup>+</sup> T cells**

204 Given the marked Th17 polarization of the CD4<sup>+</sup> T cell response to pulmonary immunization with  
205 CysVac2/Advax, we next determined the impact of neutralizing IL-17 at the time of *M. tuberculosis*  
206 challenge (Fig 5a). Treatment with anti-IL-17 mAb did not affect the capacity of CD4<sup>+</sup> T cells to  
207 respond to infection, as the frequency of cytokine-producing CD4<sup>+</sup> T cells was not altered between  
208 mice treated with anti-IL-17 or isotype control mAb (Fig 5b). However, anti-IL-17 treatment had a  
209 detrimental effect on control of bacterial infection in the lung of CysVac2/Advax immunised mice;  
210 bacteria numbers in anti-IL-17 treated mice were similar to unvaccinated mice, while immunised  
211 mice treated with isotype control mAb remained protected against infection (Fig 5c).

212 We also studied the impact of IL-17 blocking on lung cell subsets after *M. tuberculosis* infection  
213 using flow cytometry phenotyping combined with an unsupervised visual implementation of t-  
214 distributed stochastic neighbour embedding (tSNE) analysis. The generated tSNE plot was  
215 calculated with 12 parameters and 10 clusters obtained using unsupervised analysis were  
216 subsequently assigned to a specific cell population (Fig 5d), according to expression level of each  
217 marker and previously described phenotypes (S3Fig). This analysis revealed that the percentage of  
218 neutrophils in the lung were elevated in vaccinated mice treated with control mAb, however they  
219 returned to the level of unvaccinated animals after treatment with the anti-IL-17 mAb (Fig 5e). A  
220 similar pattern was observed for monocytes and monocyte-derived-macrophages, however no  
221 differences were observed for other phagocytic populations in the lung, such as alveolar  
222 macrophages (Fig 5e).

223

224 We next investigated the effect of blocking IL-17 on the priming and proliferation of CD4<sup>+</sup> T cells.  
225 To do this, we examined CD4<sup>+</sup> T cells primed by the vaccination (Ag85B-tet<sup>+</sup>) and compared to T  
226 cells responding specifically to *M. tuberculosis* (ESAT6-tet<sup>+</sup>). In the lung we observed a greater  
227 proportion of Ag85B-tet<sup>+</sup> cells in vaccinated mice compared to unvaccinated mice, however anti-  
228 IL-17 treatment did not significantly alter the numbers of proliferating CD4<sup>+</sup> T cells (S4a, b, and c  
229 Fig) or the numbers of Ag85B-tet<sup>+</sup> or ESAT6-tet<sup>+</sup> cells (S4d, e and f Fig). However, in the mLN of  
230 vaccinated mice a distinct vaccine-induced population of proliferating CD4<sup>+</sup> T cells expressing  
231 RORγT was distinguishable (Fig 6a). IL-17 blocking resulted in reduced proliferation of total CD4<sup>+</sup>  
232 T cells in the mLN of vaccinated mice (Fig 6b) including the vaccine-primed RORγT<sup>+</sup> cells (Fig 6c).  
233 When the frequency of the vaccine-primed CD4<sup>+</sup> T cells (Ag85B-tet<sup>+</sup>) were compared to those  
234 primed only by *M. tuberculosis* infection (ESAT6-tet<sup>+</sup>) (Fig 6d), Ag85B-tet<sup>+</sup> cells were significantly  
235 higher in vaccinated mice compared to the unvaccinated group, however anti-IL-17 treatment did  
236 not affect the numbers of Ag85B-tet<sup>+</sup> cells (Fig 6e). By contrast, the numbers of ESAT6-tet<sup>+</sup>  
237 positive CD4<sup>+</sup> T cells were reduced after IL-17 blocking in the mLNs (Fig 6f). Overall, neutralizing

238 of IL-17 reduced phagocytic cells in the lung of immunized animals and the numbers of pathogen-  
239 specific CD4<sup>+</sup> T cells in the draining LNs, which correlated with a loss of vaccine-mediated  
240 protection.

241

242 **Discussion**

243 The respiratory tract is the preferred port of entry of *M. tuberculosis*, with the complexity of the  
244 immunological environment in the lung potentially contributing to suboptimal pathogen responses.

245 This may be particularly detrimental in the case of *M. tuberculosis* infection, where priming and  
246 recruitment of effector T lymphocytes to the lungs is delayed, allowing unchecked growth of the  
247 organism[24, 25]. For this reason, mucosal vaccination has been of interest in the field of TB  
248 vaccines, with pulmonary delivery of BCG[14, 26], live recombinant viruses[8, 27, 28], or  
249 protein/adjuvants[29, 30] resulting in protective immune responses. When administered to the  
250 respiratory mucosa, highly inflammatory adjuvanted vaccines may induce protective immunity, but  
251 this is often accompanied by excessive inflammation, mucus accumulation and eosinophilia[31].

252 Thus, there is a need for adjuvants that can induce protective lung immunity in the absence of  
253 deleterious inflammation and pathology. We found that i.t. delivery of CysVac2/Advax<sup>CpG</sup> was  
254 significantly more protective than i.m. vaccination against challenge with *M. tuberculosis* (Fig 1).  
255 Strikingly i.t. vaccination, despite being more protective, did not induce appreciable numbers of  
256 multifunctional CD4<sup>+</sup> T cells (IFN- $\gamma$ <sup>+</sup>IL-2<sup>+</sup>TNF<sup>+</sup>; Fig 1) and even more surprisingly removal of CpG  
257 from the formulation did not reduce vaccine protection, despite a loss of multifunctional CD4<sup>+</sup> T  
258 cell generation (Fig 2). Induction of multifunctional T cell responses has been used as a key criteria  
259 for vaccine progression to human trials, however recent evidence in both mice and humans  
260 indicates that the generation of IFN- $\gamma$  secreting T cells does not necessarily correlate with  
261 protection[32]. Indeed, in our data IFN- $\gamma$  was the only cytokine analyzed pre- and post-challenge  
262 that did not correlate with the protective effect of the CysVac2/Advax vaccine (Fig 4), an important  
263 finding for the selection of vaccines for progression to human trials.

264

265 We observed that pulmonary vaccination with CysVac2 vaccination induced a lung resident CD4<sup>+</sup>  
266 population that expressed markers of T<sub>RM</sub>-like cells (Fig 3). We have previously shown that a  
267 recombinant influenza vaccine conferred protection against *M. tuberculosis* in the absence of

268 circulating memory T cells, suggesting an important role for *M. tuberculosis*-specific T<sub>RM</sub>[8]. In the  
269 current study, detailed phenotypic analysis of CysVac2/Advax-induced, antigen-specific CD4<sup>+</sup>  
270 T<sub>RM</sub>-like cells showed that in addition to well-characterized markers of tissue-resident memory cells  
271 (CD69<sup>+</sup> CD44<sup>hi</sup> CD62L<sup>low</sup> CD45 IV<sup>-</sup>), this population displayed high levels of CD11a with minimal  
272 expression of CD103 (Fig 3). This low level of CD103 expression contrasts with the increased  
273 expression of CD103 on CD8 T<sub>RM</sub>, where this integrin is thought to be essential in the retention of  
274 these cells within tissue[33]. Antigen-specific T<sub>RM</sub> cells induced following CysVac2/Advax  
275 vaccination also displayed a dominant PD-1<sup>+</sup> KLRG-1<sup>-</sup> phenotype (Fig 3). During *M. tuberculosis*  
276 infection, PD-1 expression indicates an earlier stage of CD4<sup>+</sup> T cell differentiation that is associated  
277 with a higher proliferative capacity, while KLRG-1<sup>+</sup> cells are more terminally differentiated and  
278 produce greater levels of cytokines[34]. IL-2-secreting KLRG-1<sup>-</sup> T cells induced by subunit booster  
279 vaccination are associated with protection against chronic *M. tuberculosis*, owing to maintenance of  
280 their proliferative capacity[35], and circulating KLRG-1<sup>-</sup> CD4<sup>+</sup> T cells induced by subcutaneous  
281 H56/CAF01 vaccination display the ability to home to the lungs[36]. Our findings confirmed an  
282 association between vaccine-induced, PD-1<sup>+</sup>KLRG-1<sup>-</sup> CD4<sup>+</sup> T cells that reside within the lung  
283 parenchyma and protection against *M. tuberculosis*. It is possible these cells possess greater effector  
284 functions and proliferative capacity than their KLRG-1<sup>+</sup> counterparts and are therefore capable of  
285 enhanced protection against *M. tuberculosis* infection.

286

287 Lung-resident CD4<sup>+</sup> T<sub>RM</sub> were found to be an important source of IL-17 induced after  
288 Advax:CysVac2 i.t. delivery, and this was not observed after i.m. delivery of the vaccine. This is in  
289 agreement with other studies showing that IL-17 is strongly induced following mucosal vaccination  
290 and correlates with protection against *M. tuberculosis* infection[37, 38], yet the mechanism by  
291 which this protection is specifically mediated is not well defined. Blocking of IL-17 during *M.*  
292 *tuberculosis* challenge in CysVac2/Advax-vaccinated mice resulted in a complete loss of vaccine-  
293 induced protection and correlated with reduced recruitment of lung phagocytic cells such as

294 neutrophils and macrophages, as well as a reduced priming of *M. tuberculosis*-specific T cells in the  
295 mLN (Fig 5, 6). Thus we can propose a mechanism (Fig 7) whereby IL-17 production by vaccine-  
296 specific CD4<sup>+</sup> T<sub>RM</sub> facilitates neutrophil and Monocytes/macrophages recruitment[11], and  
297 promotes the activation and proliferation of protective, pathogen-specific CD4<sup>+</sup> T cells in the mLN  
298 [39], [40],[41]. Interstitial macrophages recruitment might be beneficial because these populations  
299 appear to possess significant antimycobacterial activity, as opposed to alveolar macrophages [42].  
300 Previous work in a different infectious model has additionally demonstrated that IL-17 can mediate  
301 the recruitment of neutrophils with anti-bacterial potential[11]. Our observations differs to previous  
302 reports using the ID93+GLA-SE mucosal TB vaccine, which resulted in a Th17-dominated, tissue-  
303 resident response, but did not lead to improved protection when compared to parenteral  
304 immunization[43]. This may indicate that different adjuvants may induce diverse T<sub>RM</sub> populations,  
305 and the capacity of Advax to direct a predominant, vaccine-specific T<sub>RM</sub> response in the lung may  
306 be a key determinant in the protective efficacy of CysVac2/Advax vaccine.

307

308 Harnessing the protective role of IL-17 against pathogens needs to be balanced with potential tissue  
309 damage and pathology associated with excess cytokine levels[15]. Thus, adjuvants stimulating  
310 excessive levels of IL-17 are unlikely to be suitable for human lung administration, as observed for  
311 a candidate Sporotrichosis vaccine[44]. When CpG was removed from the CysVac2/Advax vaccine,  
312 the frequency of IL-17 secreting T cells in the lung was reduced, yet protection against *M.*  
313 *tuberculosis* challenge was not affected (Fig 2, S2 Fig). This suggests that a threshold of IL-17-  
314 secreting T cells may exist for vaccine-induced protection against *M. tuberculosis* and selecting the  
315 most ‘immunogenic’ vaccines based on the greatest level of effector responses may not be the best  
316 strategy for identifying an optimal *M. tuberculosis* vaccine formulation.

317

318 In conclusion, this report demonstrates that Advax-adjuvanted vaccines can be safely delivered to  
319 the lung to provide significant protection against aerosol *M. tuberculosis* infection. The protective

320 effect of the vaccine was associated with targeted expansion of lung-resident  $T_{RM}$  and was  
321 dependent on IL-17 recruitment of phagocytic cells to the lung and enhanced priming of T cells in  
322 the mLN. As Advax-containing vaccines have proven safe and immunogenic in human trials  
323 against viral infection and allergy[19, 45, 46] and are safe and effective in pre-clinical trials as  
324 inhaled formulations[21], CysVac2/Advax is a promising candidate for assessment of safety,  
325 immunogenicity and efficacy as a pulmonary vaccine in human subjects.

## 326 **Materials and Methods**

### 327 **Ethics statement**

328 Female C57BL/6 (6-8 weeks of age) were purchased from Australian BioResources (NSW,  
329 Australia), and housed at the Centenary Institute animal facility (Sydney, Australia) in specific  
330 pathogen-free conditions. All mouse work was performed according to ethical guidelines as set out  
331 by the University of Sydney Animal Ethics Committee. All experiments within this manuscript  
332 were approved under protocol number 2017/011. University of Sydney Animal Ethics Committee  
333 guidelines adhere to the Australian Code for the Care and Use of Animals for Scientific Purposes  
334 (2013) as set out by the National Health and Medical Research Council of Australia.

335

### 336 **Bacterial strains**

337 *M. tuberculosis* H37Rv (BEI Resources, USA) and BCG Pasteur were grown at 37° C in  
338 Middlebrook 7H9 medium (Becton Dickinson, BD) supplemented with 0.5 % glycerol, 0.02 %  
339 Tyloxapol, and 10 % albumin-dextrose-catalase (ADC) or on solid Middlebrook 7H11 medium (BD)  
340 supplemented with oleic acid–ADC.

341

### 342 **Mouse immunization, treatments and infection**

343 CysVac2 fusion protein (Ag85B-CysD) was recombinantly expressed in *E. coli*, purified from  
344 inclusions bodies by ChinaPeptides (Shanghai, China), and refolded in Tris-buffer. Advax (delta-  
345 inulin, 50 mg/ml) and Advax<sup>CpG</sup> (delta-inulin plus CpG, 50 mg/ml and 500 µg/ml, respectively)  
346 were provided by Vaxine Pty Ltd (Adelaide, Australia). Mice were anaesthetized by intraperitoneal  
347 (i.p.) injection of Ketamine/Xylazine (80/100mg/kg mouse) and then vaccinated with 1 mg of  
348 Advax or Advax<sup>CpG</sup> and 3 µg of CysVac2 in a final volume of 50 µL PBS via i.m. route, using an  
349 insulin syringe (BD), or via the i.t. route, using PennCentury Microsprayer Aerosoliser  
350 (PennCentury, PA, USA). Three µg of CysVac2 alone or sterile PBS were administered as controls



351 where appropriate. Mice were immunized subcutaneously with  $5 \times 10^5$  BCG for protection  
352 experiments.

353

354 For neutralization of IL-17, mice were injected i.p. with 250  $\mu$ g of anti-IL-17A (clone TC11-  
355 18H10.1, Biolegend) or isotype control (clone RTK2071, Biolegend) one day prior to *M.*  
356 *tuberculosis* infection and then every three days for three weeks.

357

358 For *M. tuberculosis* challenge experiments, six or 8 weeks after the last vaccination mice were  
359 infected with *M. tuberculosis* H37Rv via the aerosol route using a Middlebrook airborne infection  
360 apparatus (Glas-Col, IN, USA) with an infective dose of approximately 100 viable bacilli. Three or  
361 4 weeks later, the lungs and spleen were harvested, homogenized and plated after serial dilution on  
362 supplemented Middlebrook 7H11 agar plates. Colonies forming units (CFU) were determined 3  
363 weeks later and expressed as  $\text{Log}_{10}$  CFU.

364

365 For intravascular staining of leucocytes, three minutes before euthanasia, mice were i.v. injected  
366 with 200  $\mu$ L biotin-conjugated anti-CD45 mAb in PBS (15  $\mu$ g/mL, Biolegend, clone 104) into the  
367 lateral tail vein. Detection of biotin was performed with APC-Cy7-conjugated streptavidin  
368 (BioLegend).

369

### 370 **Cell isolation, peptide stimulations and flow cytometry**

371 PBMCs were isolated from whole blood as previously described[17]. Single cell suspensions were  
372 prepared from the lung as previously described[17]. PE-conjugated Ag85B<sub>240-254</sub>:I-A<sup>b</sup> tetramer and  
373 APC-conjugated ESAT6<sub>1-20</sub>:I-A<sup>b</sup> tetramer were provided by the NIH Tetramer Core Facility. For  
374 staining, cells were incubated with tetramers at 37 °C for 1 hour. Cells were stained using the  
375 marker-specific fluorochrome-labeled mAbs indicated in S1 Table. To assess antigen-specific  
376 cytokine induction by T cells, PBMCs or single-cell suspensions from the lung were stimulated for

377 4 hours with CysVac2 (5 µg/mL) and then supplemented with brefeldin A (10 µg/mL) for further  
378 10-12 hours. Cells were surface stained with Fixable Blue Dead Cell Stain (Life Technologies) and  
379 the marker-specific fluorochrome-labeled antibodies indicated in Supplementary Table. Cells were  
380 then fixed and permeabilized using the BD Cytfix/Cytoperm™ kit according to the manufacturer's  
381 protocol. When required, intracellular staining was performed using mAbs against the specific  
382 cytokines (S1 Table). Samples were acquired on a BD LSR-Fortessa (BD), and analyzed using  
383 FlowJo™ analysis software (Treestar, USA). A Boolean combination of gates was used to calculate  
384 the frequency of single-, double- and triple-positive CD4<sup>+</sup> T cell subsets. tSNE was run using  
385 default FlowJo parameters (iterations = 1000, perplexity = 30). Samples were randomly  
386 downsampled to 2000 events per sample and analysis was run on equal numbers of events per  
387 sample using FlowJo tSNE plugin.

388

### 389 **Statistical analysis**

390 Statistical analysis was performed using GraphPad Prism 6 software (GraphPad Software, USA).  
391 The significance of differences between experimental groups was evaluated by one-way analysis of  
392 variance (ANOVA), with pairwise comparison of multi-grouped data sets achieved using the Tukey  
393 post-hoc test. Differences are considered statistically different when  $p \leq 0.01$ .

394

### 395 **Acknowledgments**

396 This work was supported by a National Health and Medical Research Council (NHMRC) Project  
397 Grant (APP1043519) and the NHMRC Centre of Research Excellence in Tuberculosis Control  
398 (APP1043225). We acknowledge the support of the European H2020 grant TBVAC2020 15  
399 643381, the provision of reagents through the NIH Tetramer Core Facility and assistance from the  
400 Advanced Cytometry Facility and animal facility at the Centenary Institute. NP is supported by  
401 National Institutes of Health contract HHSN272201400053C and development of Advax adjuvant  
402 was supported by NIH Contracts AI061142 and HHSN272200800039C.

403

404 **Author contributions**

405 **Conceptualization:** Claudio Counoupas, Nikolai Petrovsky, Warwick J. Britton, James A. Triccas

406 **Data curation:** Claudio Counoupas, Kia Ferrell, Anneliese Ashhurst, James A. Triccas

407 **Formal analysis:** Claudio Counoupas, Kia Ferrell, Anneliese Ashhurst, James A. Triccas

408 **Funding acquisition:** Nikolai Petrovsky, Warwick J. Britton, James A. Triccas

409 **Investigation:** Claudio Counoupas, Kia Ferrell, Anneliese Ashhurst, Nayan Bhattacharyya,

410 Gayathri Nagalingam

411 **Methodology:** Claudio Counoupas, Kia Ferrell, Anneliese Ashhurst, Nayan Bhattacharyya, Carl G.

412 Feng, James A. Triccas

413 **Project administration:** James A. Triccas

414 **Resources:** Carl G. Feng, Nikolai Petrovsky, Warwick J. Britton, James A. Triccas

415 **Supervision:** Claudio Counoupas, James A. Triccas

416 **Writing – original draft:** Claudio Counoupas, Kia Ferrell, James A. Triccas

417 **Writing – review & editing:** Claudio Counoupas, Kia Ferrell, Anneliese Ashhurst, Nayan

418 Bhattacharyya, Gayathri Nagalingam, Carl G. Feng, Nikolai Petrovsky, Warwick J. Britton, James

419 A. Triccas

420

421 **Conflict of Interest Disclosure:** NP is the research director for Vaxine P/L. All authors attest they

422 meet the criteria for authorship.

423 **References**

- 424 1. World Health Organization. Global tuberculosis report 2018. WHO, 2018.
- 425 2. Mangtani P, Abubakar I, Ariti C, Beynon R, Pimpin L, Fine PE, et al. Protection by BCG  
426 vaccine against tuberculosis: a systematic review of randomized controlled trials. *Clin Infect Dis*.  
427 2014;58(4):470-80. doi: 10.1093/cid/cit790. PubMed PMID: 24336911.
- 428 3. Knight GM, Griffiths UK, Sumner T, Laurence YV, Gheorghe A, Vassall A, et al. Impact  
429 and cost-effectiveness of new tuberculosis vaccines in low- and middle-income countries. *Proc Natl*  
430 *Acad Sci U S A*. 2014;111(43):15520-5. doi: 10.1073/pnas.1404386111. PubMed PMID: 25288770;  
431 PubMed Central PMCID: PMC4217399.
- 432 4. Kaufmann SH, Weiner J, von Reyn CF. Novel approaches to tuberculosis vaccine  
433 development. *Int J Infect Dis*. 2017;56:263-7. Epub 2016/11/07. doi: 10.1016/j.ijid.2016.10.018.  
434 PubMed PMID: 27816661.
- 435 5. Van Der Meeren O, Hatherill M, Nduba V, Wilkinson RJ, Muyoyeta M, Van Brakel E, et al.  
436 Phase 2b controlled trial of M72/AS01E vaccine to prevent tuberculosis. *N Engl J Med*.  
437 2018;379(17):1621-34. Epub 2018/10/04. doi: 10.1056/NEJMoa1803484. PubMed PMID:  
438 30280651; PubMed Central PMCID: PMC6151253.
- 439 6. Tait DR, Hatherill M, Van Der Meeren O, Ginsberg AM, Van Brakel E, Salaun B, et al.  
440 Final analysis of a trial of M72/AS01E vaccine to prevent tuberculosis. *N Engl J Med*.  
441 2019;381(25):2429-39. Epub 2019/10/30. doi: 10.1056/NEJMoa1909953. PubMed PMID:  
442 31661198.
- 443 7. Shim BS, Cheon IS, Lee E, Park SM, Choi Y, Jung DI, et al. Development of safe and non-  
444 self-immunogenic mucosal adjuvant by recombinant fusion of cholera toxin A1 Subunit with  
445 protein transduction domain. *J Immunol Res*. 2018;2018:9830701. Epub 2018/05/01. doi:  
446 10.1155/2018/9830701. PubMed PMID: 29707588; PubMed Central PMCID: PMC6151253.
- 447 8. Florido M, Muflihah H, Lin LCW, Xia Y, Sierro F, Palendira M, et al. Pulmonary  
448 immunization with a recombinant influenza A virus vaccine induces lung-resident CD4(+) memory

- 449 T cells that are associated with protection against tuberculosis. *Mucosal Immunol.* 2018. doi:  
450 10.1038/s41385-018-0065-9. PubMed PMID: 30115996.
- 451 9. Darrah PA, Zeppa JJ, Maiello P, Hackney JA, Wadsworth MH, 2nd, Hughes TK, et al.  
452 Prevention of tuberculosis in macaques after intravenous BCG immunization. *Nature.*  
453 2020;577(7788):95-102. Epub 2020/01/03. doi: 10.1038/s41586-019-1817-8. PubMed PMID:  
454 31894150.
- 455 10. Perdomo C, Zedler U, Kuhl AA, Lozza L, Saikali P, Sander LE, et al. Mucosal BCG  
456 vaccination induces protective lung-resident memory T cell populations against tuberculosis. *MBio.*  
457 2016;7(6). doi: 10.1128/mBio.01686-16. PubMed PMID: 27879332; PubMed Central PMCID:  
458 PMC5120139.
- 459 11. Flannigan KL, Ngo VL, Geem D, Harusato A, Hirota SA, Parkos CA, et al. IL-17A-  
460 mediated neutrophil recruitment limits expansion of segmented filamentous bacteria. *Mucosal*  
461 *Immunol.* 2017;10(3):673-84. doi: 10.1038/mi.2016.80. PubMed PMID: 27624780; PubMed  
462 Central PMCID: PMC5350071.
- 463 12. Khader SA, Bell GK, Pearl JE, Fountain JJ, Rangel-Moreno J, Cilley GE, et al. IL-23 and  
464 IL-17 in the establishment of protective pulmonary CD4<sup>+</sup> T cell responses after vaccination and  
465 during *Mycobacterium tuberculosis* challenge. *Nat Immunol.* 2007;8(4):369-77. doi:  
466 10.1038/ni1449. PubMed PMID: 17351619.
- 467 13. Ahmed M, Smith DM, Hamouda T, Rangel-Moreno J, Fattom A, Khader SA. A novel  
468 nanoemulsion vaccine induces mucosal Interleukin-17 responses and confers protection upon  
469 *Mycobacterium tuberculosis* challenge in mice. *Vaccine.* 2017;35(37):4983-9. doi:  
470 10.1016/j.vaccine.2017.07.073. PubMed PMID: 28774560; PubMed Central PMCID:  
471 PMC5572488.
- 472 14. Moliva JJ, Hossfeld AP, Sidiki S, Canan CH, Dwivedi V, Beamer G, et al. Selective  
473 delipidation of *Mycobacterium bovis* BCG enables direct pulmonary vaccination and enhances

- 474 protection against *Mycobacterium tuberculosis*. *Mucosal Immunol.* 2019. Epub 2019/02/20. doi:  
475 10.1038/s41385-019-0148-2. PubMed PMID: 30778118.
- 476 15. Das S, Khader S. Yin and yang of interleukin-17 in host immunity to infection. *F1000Res.*  
477 2017;6:741. Epub 2017/07/18. doi: 10.12688/f1000research.10862.1. PubMed PMID: 28713557;  
478 PubMed Central PMCID: PMC5490359.
- 479 16. Counoupas C, Pinto R, Nagalingam G, Britton WJ, Petrovsky N, Triccas JA. Delta inulin-  
480 based adjuvants promote the generation of polyfunctional CD4(+) T cell responses and protection  
481 against *Mycobacterium tuberculosis* infection. *Sci Rep.* 2017;7(1):8582. Epub 2017/08/19. doi:  
482 10.1038/s41598-017-09119-y. PubMed PMID: 28819247; PubMed Central PMCID:  
483 PMC5561132.
- 484 17. Counoupas C, Pinto R, Nagalingam G, Hill-Cawthorne GA, Feng CG, Britton WJ, et al.  
485 *Mycobacterium tuberculosis* components expressed during chronic infection of the lung contribute  
486 to long-term control of pulmonary tuberculosis in mice. *NPJ Vaccines.* 2016;1:16012. Epub  
487 2016/09/15. doi: 10.1038/npjvaccines.2016.12. PubMed PMID: 29263854; PubMed Central  
488 PMCID: PMC5707878.
- 489 18. Feinen B, Petrovsky N, Verma A, Merkel TJ. Advax-adjuvanted recombinant protective  
490 antigen provides protection against inhalational anthrax that is further enhanced by addition of  
491 murabutide adjuvant. *Clin Vaccine Immunol.* 2014;21(4):580-6. Epub 2014/02/21. doi:  
492 10.1128/CVI.00019-14. PubMed PMID: 24554695; PubMed Central PMCID: PMC3993118.
- 493 19. Gordon DL, Sajkov D, Honda-Okubo Y, Wilks SH, Aban M, Barr IG, et al. Human Phase 1  
494 trial of low-dose inactivated seasonal influenza vaccine formulated with Advax delta inulin  
495 adjuvant. *Vaccine.* 2016;34(33):3780-6. Epub 2016/06/28. doi: 10.1016/j.vaccine.2016.05.071.  
496 PubMed PMID: 27342914; PubMed Central PMCID: PMC4949042.
- 497 20. Tomar J, Biel C, de Haan CAM, Rottier PJM, Petrovsky N, Frijlink HW, et al. Passive  
498 inhalation of dry powder influenza vaccine formulations completely protects chickens against  
499 H5N1 lethal viral challenge. *Eur J Pharm Biopharm.* 2018;133:85-95. PubMed PMID: 30312742.

- 500 21. Tomar J, Patil HP, Bracho G, Tonnis WF, Frijlink HW, Petrovsky N, et al. Advax augments  
501 B and T cell responses upon influenza vaccination via the respiratory tract and enables complete  
502 protection of mice against lethal influenza virus challenge. *J Control Release*. 2018;288:199-211.  
503 doi: 10.1016/j.jconrel.2018.09.006. PubMed PMID: 30218687.
- 504 22. Chu RS, Targoni OS, Krieg AM, Lehmann PV, Harding CV. CpG oligodeoxynucleotides  
505 act as adjuvants that switch on T helper 1 (Th1) immunity. *J Exp Med*. 1997;186(10):1623-31.  
506 PubMed PMID: 9362523; PubMed Central PMCID: PMCPMC2199137.
- 507 23. Park CO, Kupper TS. The emerging role of resident memory T cells in protective immunity  
508 and inflammatory disease. *Nat Med*. 2015;21(7):688-97. Epub 2015/06/30. doi: 10.1038/nm.3883.  
509 PubMed PMID: 26121195; PubMed Central PMCID: PMCPMC4640452.
- 510 24. Reiley WW, Calayag MD, Wittmer ST, Huntington JL, Pearl JE, Fountain JJ, et al. ESAT-  
511 6-specific CD4 T cell responses to aerosol *Mycobacterium tuberculosis* infection are initiated in the  
512 mediastinal lymph nodes. *Proc Natl Acad Sci U S A*. 2008;105(31):10961-6. Epub 2008/08/01. doi:  
513 10.1073/pnas.0801496105. PubMed PMID: 18667699; PubMed Central PMCID:  
514 PMCPMC2504808.
- 515 25. Wolf AJ, Desvignes L, Linas B, Banaiee N, Tamura T, Takatsu K, et al. Initiation of the  
516 adaptive immune response to *Mycobacterium tuberculosis* depends on antigen production in the  
517 local lymph node, not the lungs. *J Exp Med*. 2008;205(1):105-15. Epub 2007/12/26. doi:  
518 10.1084/jem.20071367. PubMed PMID: 18158321; PubMed Central PMCID: PMCPMC2234384.
- 519 26. Bull NC, Stylianou E, Kaveh DA, Pinpathomrat N, Pasricha J, Harrington-Kandt R, et al.  
520 Enhanced protection conferred by mucosal BCG vaccination associates with presence of antigen-  
521 specific lung tissue-resident PD-1(+) KLRG1(-) CD4(+) T cells. *Mucosal Immunol*.  
522 2019;12(2):555-64. Epub 2018/11/18. doi: 10.1038/s41385-018-0109-1. PubMed PMID: 30446726.
- 523 27. Green CA, Sande CJ, Scarselli E, Capone S, Vitelli A, Nicosia A, et al. Novel genetically-  
524 modified chimpanzee adenovirus and MVA-vectored respiratory syncytial virus vaccine safely

- 525 boosts humoral and cellular immunity in healthy older adults. *J Infect.* 2019. Epub 2019/02/12. doi:  
526 10.1016/j.jinf.2019.02.003. PubMed PMID: 30742894.
- 527 28. Manjaly Thomas ZR, Satti I, Marshall JL, Harris SA, Lopez Ramon R, Hamidi A, et al.  
528 Alternate aerosol and systemic immunisation with a recombinant viral vector for tuberculosis,  
529 MVA85A: A phase I randomised controlled trial. *PLoS Med.* 2019;16(4):e1002790. Epub  
530 2019/05/01. doi: 10.1371/journal.pmed.1002790. PubMed PMID: 31039172; PubMed Central  
531 PMCID: PMCPMC6490884 following competing interests: HMCS is a Jenner Institute Investigator  
532 and a Wellcome Trust Senior Clinical Research Fellow. ZM was a NIHR BRC Clinical Research  
533 Training fellow.
- 534 29. Van Dis E, Sogi KM, Rae CS, Sivick KE, Surh NH, Leong ML, et al. STING-activating  
535 adjuvants elicit a Th17 immune response and protect against *Mycobacterium tuberculosis* infection.  
536 *Cell Rep.* 2018;23(5):1435-47. doi: 10.1016/j.celrep.2018.04.003. PubMed PMID: 29719256;  
537 PubMed Central PMCID: PMCPMC6003617.
- 538 30. Copland A, Diogo GR, Hart P, Harris S, Tran AC, Paul MJ, et al. Mucosal delivery of  
539 fusion proteins with *Bacillus subtilis* spores enhances protection against tuberculosis by Bacillus  
540 Calmette-Guerin. *Front Immunol.* 2018;9:346. doi: 10.3389/fimmu.2018.00346. PubMed PMID:  
541 29593708; PubMed Central PMCID: PMCPMC5857916.
- 542 31. Kim KH, Lee YT, Hwang HS, Kwon YM, Jung YJ, Lee Y, et al. Alum Adjuvant Enhances  
543 Protection against respiratory syncytial virus but exacerbates pulmonary inflammation by  
544 modulating multiple innate and adaptive immune cells. *PLoS One.* 2015;10(10):e0139916. Epub  
545 2015/10/16. doi: 10.1371/journal.pone.0139916. PubMed PMID: 26468884; PubMed Central  
546 PMCID: PMCPMC4607166.
- 547 32. Rodo MJ, Rozot V, Nemes E, Dintwe O, Hatherill M, Little F, et al. A comparison of  
548 antigen-specific T cell responses induced by six novel tuberculosis vaccine candidates. *PLoS*  
549 *Pathog.* 2019;15(3):e1007643. Epub 2019/03/05. doi: 10.1371/journal.ppat.1007643. PubMed  
550 PMID: 30830940; PubMed Central PMCID: PMCPMC6417742.



- 551 33. Wakim LM, Woodward-Davis A, Bevan MJ. Memory T cells persisting within the brain  
552 after local infection show functional adaptations to their tissue of residence. Proc Natl Acad Sci U S  
553 A. 2010;107(42):17872-9. Epub 2010/10/07. doi: 10.1073/pnas.1010201107. PubMed PMID:  
554 20923878; PubMed Central PMCID: PMCPMC2964240.
- 555 34. Reiley WW, Shafiani S, Wittmer ST, Tucker-Heard G, Moon JJ, Jenkins MK, et al. Distinct  
556 functions of antigen-specific CD4 T cells during murine *Mycobacterium tuberculosis* infection.  
557 Proc Natl Acad Sci U S A. 2010;107(45):19408-13. Epub 2010/10/22. doi:  
558 10.1073/pnas.1006298107. PubMed PMID: 20962277; PubMed Central PMCID:  
559 PMCPMC2984157.
- 560 35. Lindenstrom T, Knudsen NP, Agger EM, Andersen P. Control of chronic *Mycobacterium*  
561 *tuberculosis* infection by CD4 KLRG1- IL-2-secreting central memory cells. J Immunol.  
562 2013;190(12):6311-9. doi: 10.4049/jimmunol.1300248. PubMed PMID: 23677471.
- 563 36. Woodworth JS, Cohen SB, Moguche AO, Plumlee CR, Agger EM, Urdahl KB, et al.  
564 Subunit vaccine H56/CAF01 induces a population of circulating CD4 T cells that traffic into the  
565 *Mycobacterium tuberculosis*-infected lung. Mucosal Immunol. 2017;10(2):555-64. Epub  
566 2016/08/25. doi: 10.1038/mi.2016.70. PubMed PMID: 27554293; PubMed Central PMCID:  
567 PMCPMC5325828.
- 568 37. Aguilo N, Alvarez-Arguedas S, Uranga S, Marinova D, Monzon M, Badiola J, et al.  
569 Pulmonary but not subcutaneous delivery of BCG vaccine confers protection to tuberculosis-  
570 susceptible mice by an interleukin 17-dependent mechanism. J Infect Dis. 2016;213(5):831-9. doi:  
571 10.1093/infdis/jiv503. PubMed PMID: 26494773.
- 572 38. Gopal R, Rangel-Moreno J, Slight S, Lin Y, Nawar HF, Fallert Junecko BA, et al.  
573 Interleukin-17-dependent CXCL13 mediates mucosal vaccine-induced immunity against  
574 tuberculosis. Mucosal Immunol. 2013;6(5):972-84. doi: 10.1038/mi.2012.135. PubMed PMID:  
575 23299616; PubMed Central PMCID: PMCPMC3732523.

- 576 39. Liang F, Lindgren G, Sandgren KJ, Thompson EA, Francica JR, Seubert A, et al. Vaccine  
577 priming is restricted to draining lymph nodes and controlled by adjuvant-mediated antigen uptake.  
578 *Sci Transl Med.* 2017;9(393). doi: 10.1126/scitranslmed.aal2094. PubMed PMID: 28592561.
- 579 40. Morel C, Badell E, Abadie V, Robledo M, Setterblad N, Gluckman JC, et al.  
580 *Mycobacterium bovis* BCG-infected neutrophils and dendritic cells cooperate to induce specific T  
581 cell responses in humans and mice. *Eur J Immunol.* 2008;38(2):437-47. Epub 2008/01/19. doi:  
582 10.1002/eji.200737905. PubMed PMID: 18203135.
- 583 41. Blomgran R, Ernst JD. Lung neutrophils facilitate activation of naive antigen-specific CD4+  
584 T cells during *Mycobacterium tuberculosis* infection. *J Immunol.* 2011;186(12):7110-9. doi:  
585 10.4049/jimmunol.1100001. PubMed PMID: 21555529; PubMed Central PMCID: PMC3376160.
- 586 42. Huang L, Nazarova EV, Tan S, Liu Y, Russell DG. Growth of *Mycobacterium tuberculosis*  
587 in vivo segregates with host macrophage metabolism and ontogeny. *J Exp Med.* 2018;215(4):1135-  
588 52. Epub 2018/03/04. doi: 10.1084/jem.20172020. PubMed PMID: 29500179; PubMed Central  
589 PMCID: PMC5881470.
- 590 43. Orr MT, Beebe EA, Hudson TE, Argilla D, Huang PW, Reese VA, et al. Mucosal delivery  
591 switches the response to an adjuvanted tuberculosis vaccine from systemic TH1 to tissue-resident  
592 TH17 responses without impacting the protective efficacy. *Vaccine.* 2015;33(48):6570-8. doi:  
593 10.1016/j.vaccine.2015.10.115. PubMed PMID: 26541135; PubMed Central PMCID:  
594 PMC4679420.
- 595 44. Portuondo DL, Batista-Duharte A, Ferreira LS, de Andrade CR, Quinello C, Tellez-  
596 Martinez D, et al. Comparative efficacy and toxicity of two vaccine candidates against *Sporothrix*  
597 *schenckii* using either Montanide Pet Gel A or aluminum hydroxide adjuvants in mice. *Vaccine.*  
598 2017;35(34):4430-6. Epub 2017/07/09. doi: 10.1016/j.vaccine.2017.05.046. PubMed PMID:  
599 28687406.
- 600 45. Gordon D, Kelley P, Heinzl S, Cooper P, Petrovsky N. Immunogenicity and safety of  
601 Advax, a novel polysaccharide adjuvant based on delta inulin, when formulated with hepatitis B

602 surface antigen: a randomized controlled Phase 1 study. *Vaccine*. 2014;32(48):6469-77. Epub  
603 2014/10/01. doi: 10.1016/j.vaccine.2014.09.034. PubMed PMID: 25267153; PubMed Central  
604 PMCID: PMC4253909.

605 46. Heddle R, Smith A, Woodman R, Hissaria P, Petrovsky N. Randomized controlled trial  
606 demonstrating the benefits of delta inulin adjuvanted immunotherapy in patients with bee venom  
607 allergy. *J Allergy Clin Immunol*. 2019;144(2):504-13 e16. Epub 2019/07/14. doi:  
608 10.1016/j.jaci.2019.03.035. PubMed PMID: 31300280.

609

610

611 **Figure Legends**

612

613 **Figure 1. Pulmonary vaccination with CysVac2/Advax<sup>CpG</sup> demonstrates improved protection**  
614 **against *M. tuberculosis* infection compared to parenteral administration.** C57BL/6 mice (n=5-6)  
615 were vaccinated by either the i.m. or i.t. route with CysVac2(CV2)/Advax<sup>CpG</sup> (3 times, 2 weeks  
616 apart). One week after last vaccination mice were bled for vaccine immunogenicity assessment. Six  
617 weeks after last immunization mice were challenged with H37Rv by aerosol (~100 CFU) and four  
618 weeks later culled to enumerate bacterial burden and T cell phenotype in the lung (a). PBMCs from  
619 tail blood of vaccinated mice (b, c, d) or cells from lung of infected mice (e, f, g) were restimulated  
620 *ex vivo* with CysVac2, and the production cytokines (IFN- $\gamma$ , IL-2, IL-17, TNF), or transcription  
621 factors (TF; T-bet, ROR $\gamma$ T) by CD4<sup>+</sup> T cells was determined by flow cytometry. Data are  
622 represented as the percentage of cytokine-producing or transcription factor-positive CD4<sup>+</sup> T cells  $\pm$   
623 SEM. Bacterial load was assessed in the lungs (h) and in the spleen (i) and presented as Log<sub>10</sub> of the  
624 mean CFU  $\pm$  SEM. Data are pooled from 3 independent experiments. Significance of differences  
625 between the groups was determined by ANOVA (\*p<0.05; \*\*p<0.01; \*\*\*p<0.001).

626

627 **Figure 2. CpG is dispensable for protective immunity induced by CysVac2/Advax.** C57BL/6  
628 mice (n=5-6) were vaccinated by the i.t. route with CysVac2/Advax<sup>CpG</sup> or CysVac2/Advax (3 times,  
629 2 weeks apart). Six weeks after last immunization mice were challenged with *M. tuberculosis*  
630 H37Rv by aerosol (~100 CFU) and four weeks later culled to enumerate bacterial burden and T cell  
631 phenotype in the lung. Cells from lung of infected mice were restimulated *ex vivo* with CysVac2  
632 and the production of cytokines (IFN- $\gamma$ , IL-2, IL-17, TNF; panel a and b) or transcription factors (T-  
633 bet, ROR $\gamma$ T; panel c) by CD4<sup>+</sup> T cells was determined by flow cytometry. Data are represented as  
634 the percentage of cytokine-producing CD4<sup>+</sup> T cells  $\pm$  SEM. Bacterial load was assessed in the lungs  
635 (d) and in the spleen (e) and presented as Log<sub>10</sub> of the mean CFU  $\pm$  SEM. Data are pooled from 2

636 independent experiments. Significance of differences between the groups was determined by  
637 ANOVA (\* $p < 0.05$ ; \*\* $p < 0.01$ ; \*\*\* $p < 0.001$ ).

638

639 **Figure 3. Pulmonary vaccination with CysVac2/Advax induces Ag-specific persistent local**  
640 **resident CD4<sup>+</sup> T cells.** C57BL/6 mice (n=3-4) were vaccinated by the i.t. route with  
641 CysVac2/Advax or CysVac2 (3 times, 2 weeks apart). At weeks 2, 4, or 8 after final immunization,  
642 lung cells were processed for Ag85B:I-A<sup>b</sup> tetramer staining (a, Representative dot plot from 8  
643 weeks post-immunization). Number of Ag85B:I-A<sup>b</sup> tetramer positive cells in the lung over time are  
644 shown in (b). Also shown are the percentage of total CD4<sup>+</sup> T cells expressing phenotypic makers  
645 markers associated with TRMs (CD45<sup>IV-</sup>, CD11a<sup>+</sup>, CD69<sup>+</sup>, CD44<sup>+</sup>, PD1<sup>+</sup> KLRG<sup>-</sup>, c) and  
646 representative dot plots of TRMs markers on total lung CD4<sup>+</sup> T cells (d) or in Ag85B:I-A<sup>b+</sup> cells (e)  
647 at 8 weeks after last vaccination. Data are representative of 2 independent experiments. Significance  
648 of differences between the groups was determined by ANOVA (\* $p < 0.05$ ; \*\* $p < 0.01$ ; \*\*\* $p < 0.001$ ).

649

650 **Figure 4. Persistent CysVac2-specific IL-17 production by lung-resident CD4<sup>+</sup> T cells after**  
651 **pulmonary vaccination with CysVac2/Advax.** C57BL/6 mice (n=4) were vaccinated by the i.t.  
652 route with CysVac2/Advax or CysVac2 protein alone (3 times, 2 weeks apart). Eight weeks after  
653 the last immunization mice were challenged with *M. tuberculosis* H37Rv by aerosol (~100 CFU).  
654 At 2, 4, or 8 weeks after last immunization (solid bars) , and at 4 weeks after infection (striped bars),  
655 lung cells were restimulated *ex vivo* with CysVac2 and the production of IFN- $\gamma$  (a), IL-17 (b), IL-2  
656 (c) or TNF (d) by CD4<sup>+</sup> T cells determined by flow cytometry. Representative dot plots of co-  
657 expression of CD45<sup>IV-</sup> or ROR $\gamma$ T with IL-17 by total CD4<sup>+</sup> T cells (e) or Ag85B:I-A<sup>b</sup> tetramer  
658 positive cells (f) at 8 weeks after last vaccination. Data are represented as the percentage of  
659 cytokine-producing CD4<sup>+</sup> T cells  $\pm$  SEM and is representative of 2 independent experiments.  
660 Significance of differences between the groups was determined by ANOVA (\* $p < 0.05$ ; \*\* $p < 0.01$ ;  
661 \*\*\* $p < 0.001$ ).

662

663 **Figure 5. Protection afforded by pulmonary CysVac2/Advax against aerosol *M. tuberculosis* is**  
664 **dependent on IL-17 and correlates with lung phagocytic cells recruitment.** C57BL/6 mice (n=6)  
665 were vaccinated by the i.t. route with CysVac2/Advax (3 times, 2 weeks apart) and at 8 weeks after  
666 last immunization mice were challenged with *M. tuberculosis* H37Rv by aerosol (~100 CFU). One  
667 day before aerosol, mice were treated i.p. with anti-IL-17 or an isotype control mAb (twice weekly  
668 for 3 weeks) (a). Cells from the lungs of infected mice were restimulated *ex vivo* with CysVac2 and  
669 cytokines secretion (IFN- $\gamma$ , IL-2, IL-17, TNF) determined (b). Bacterial load was assessed in the  
670 lungs and is presented as Log<sub>10</sub> of the mean CFU  $\pm$  SEM (c). Representative tSNE dimension 1 and  
671 2 plots of the total live cells in the lung (d). Bar graphs show the percentage of identified lung cells  
672 subsets (e). Data are pooled of 2 independent experiments. Significance of differences between the  
673 groups was determined by ANOVA (\*p<0.05; \*\*p<0.01; \*\*\*p<0.001).

674

675 **Figure 6. Blocking IL-17 during *M. tuberculosis* infection impairs the proliferation of**  
676 **pathogen-specific CD4<sup>+</sup> T cells in the mediastinal lymph nodes.** C57BL/6 mice (n=6) were  
677 vaccinated with CysVac2/Advax and treated i.p. with anti-IL-17 mAb, as described in Figure 5.  
678 Representative dot plot of the expression of Ki67 and ROR $\gamma$ T on CD4<sup>+</sup> T cells (a). Bar graphs show  
679 numbers of total (b) and ROR $\gamma$ T<sup>+</sup> (c) proliferating CD4<sup>+</sup> T cells enumerated in the mLN.  
680 Representative dot plots show CD44 and either Ag85B:I-A<sup>b</sup> or ESAT6:I-A<sup>b</sup> staining on CD4<sup>+</sup> T  
681 cells in the mLN (d), with total number  $\pm$  SEM of Ag85B:I-A<sup>b+</sup> (e) and ESAT6:I-A<sup>b+</sup> (f) CD4<sup>+</sup> T  
682 cells in the mLN. Data are pooled of 2 independent experiments. Significance of differences  
683 between the groups was determined by ANOVA (\*p<0.05; \*\*p<0.01).

684

685 **Figure 7. Proposed mechanism of immunity generated by pulmonary vaccination with**  
686 **CysVac2/Advax against *M. tuberculosis* infection.** Pulmonary vaccination of CysVac2/Advax  
687 induces the development of a Th17 T<sub>RM</sub> population of antigen-specific CD4<sup>+</sup> T cells in the lung.

688 Following aerosol *M. tuberculosis* infection, T cell IL-17 drives neutrophil and macrophage  
689 recruitment to the lung. This early response may be responsible for increased activation or  
690 trafficking of antigen presenting cells to the mLN, which in turn promotes the priming and  
691 proliferation of pathogen-specific CD4<sup>+</sup> T cells in mLN that migrate to the lung and contribute to  
692 protection against *M. tuberculosis* infection.

693

694 **S1 Figure. Comparative analysis of multifunctional CD4<sup>+</sup> T cell subsets before and after *M.***  
695 ***tuberculosis* infection of mice vaccinated with CysVac2/Advax<sup>CpG</sup> either via pulmonary or**  
696 **parenteral route.**

697 C57BL/6 mice (n=5-6) were vaccinated by either the i.m. or i.t. route with CysVac2  
698 (CV2)/Advax<sup>CpG</sup> (3 times, 2 weeks apart). One week after last vaccination mice were bled for  
699 vaccine immunogenicity assessment. Six weeks after last immunization mice were challenged with  
700 H37Rv by aerosol (~100 CFU) and four weeks later culled to enumerate bacterial burden and T cell  
701 phenotype in the lung. PBMCs (one week after last vaccination, panel a) and lung cells 4-weeks p.i.  
702 (panel b) were restimulated with CysVac2 fusion protein, and analysed for intracellular expression  
703 of IFN- $\gamma$ , IL-2, IL-17, and TNF by flow cytometry. Boolean gating analysis was performed to  
704 identify subsets of CD4<sup>+</sup> T cells expressing different combinations of these cytokines. Data is  
705 representative of 2 independent experiments. Significance difference between the groups was  
706 determined by ANOVA (\*p<0.05; \*\*p<0.01).

707

708 **S2 Figure. Comparative analysis of lung multifunctional CD4<sup>+</sup> T cell subsets after *M.***  
709 ***tuberculosis* infection of mice vaccinated via pulmonary route with either CysVac2/Advax or**  
710 **CysVac2/Advax<sup>CpG</sup>.**

711 C57BL/6 mice (n=5-6) were vaccinated by i.t. route with either CysVac2 (CV2)/Advax or CysVac2  
712 (CV2)/Advax<sup>CpG</sup> (3 times, 2 weeks apart). Six weeks after last immunization mice were challenged  
713 with H37Rv by aerosol (~100 CFU), and four weeks later culled to enumerate bacterial burden and

714 T cell phenotype in the lung. Lung cells 4 weeks p.i. were restimulated with CysVac2 fusion  
715 protein, and analysed for intracellular expression of IFN- $\gamma$ , IL-2, IL-17, and TNF by flow cytometry.  
716 Boolean gating analysis was performed to identify subsets of CD4<sup>+</sup> T cells expressing different  
717 combinations of these cytokines. Data is representative of 2 independent experiments. Significance  
718 difference between the groups was determined by ANOVA (\*p < 0.05; \*\*p < 0.01).

719

720 **S3 Figure. tSNE expression of markers in the lung of mice after *M. tuberculosis* infection and**  
721 **anti-IL-17 mAb treatment.** Example of tSNE dimension 1 and 2 plots of the lung compartment  
722 show relative expression intensity of each indicated phenotypic marker. tSNE heat maps show  
723 fluorescent intensity of each marker for each event. Scales on the heat maps are individually  
724 generated for each surface marker from low to high expression. (Ashhurst, T. M. 2017, tSNEplots  
725 v1.3. GitHub repository).

726

727 **S4 Figure. Effects of blocking IL-17 during *M. tuberculosis* infection on CD4<sup>+</sup> T cells**  
728 **proliferation in the lung.**

729 C57BL/6 mice (n=5-6) were vaccinated i.t. with CysVac2/Advax and treated i.p. with anti-IL-17  
730 mAb, as described in Figure 5. Representative dot plot of the expression of Ki67 and ROR $\gamma$ T on  
731 CD4<sup>+</sup> T cells from the lung (a). Bar graphs showing numbers of total (b) and Ror $\gamma$ T<sup>+</sup> (c)  
732 proliferating CD4<sup>+</sup> T cells enumerated in the lung. Representative dot plots show CD44 and either  
733 Ag85B:I-Ab or ESAT6:I-Ab staining on CD4<sup>+</sup> T cells in the lung (d), with total number  $\pm$  SEM of  
734 Ag85B:I-Ab<sup>+</sup> (e) and ESAT6:I-Ab<sup>+</sup> (f) CD4<sup>+</sup> T cells in the lung. Data are pooled of 2 independent  
735 experiments. Significance of differences between the groups was determined by ANOVA (\*p < 0.05;  
736 \*\*\*p < 0.001; NS=not significant).

737

738 **S1 Table. List of antibodies used.**



a

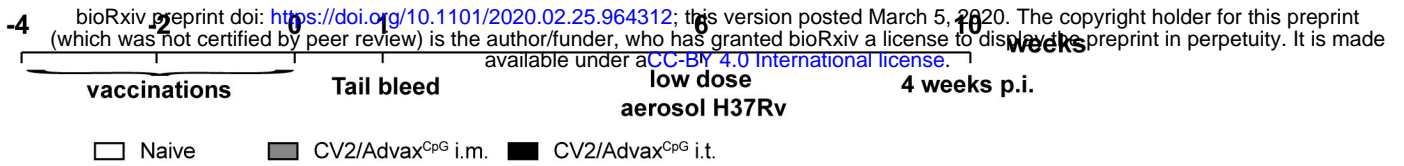

b

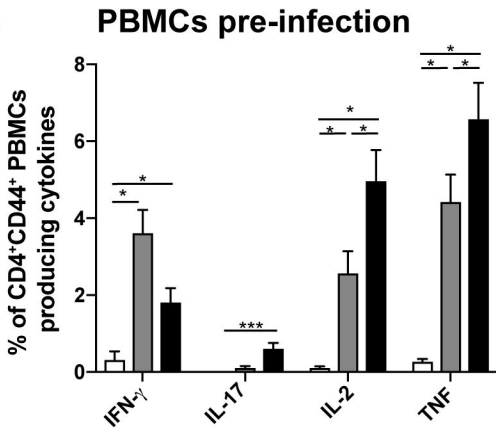

c

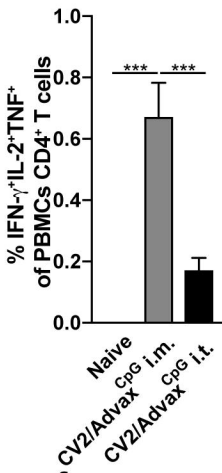

d

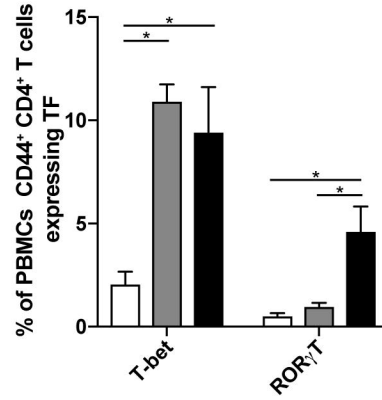

e

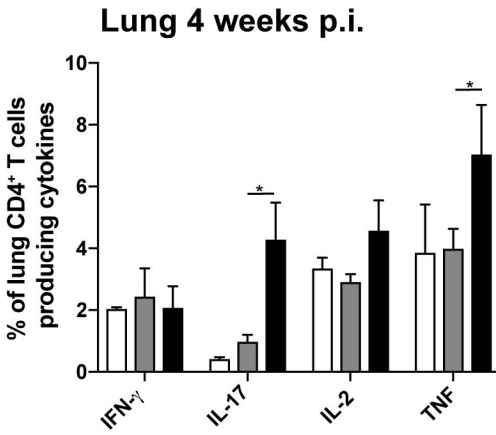

f

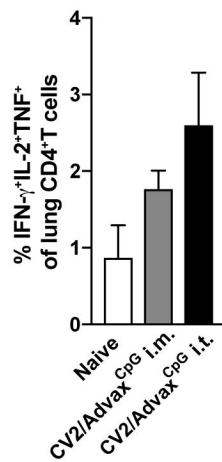

g

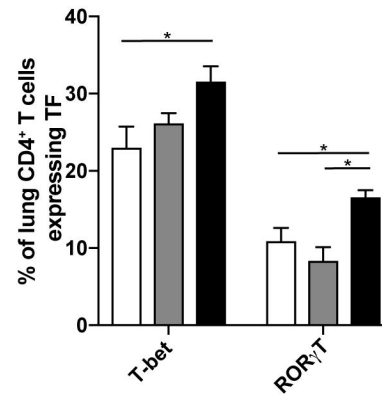

h

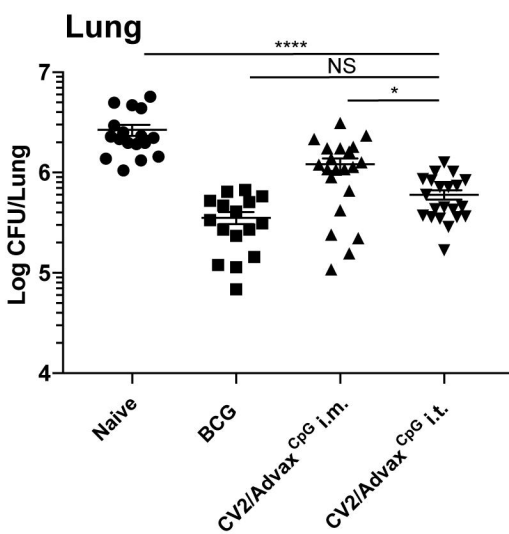

i

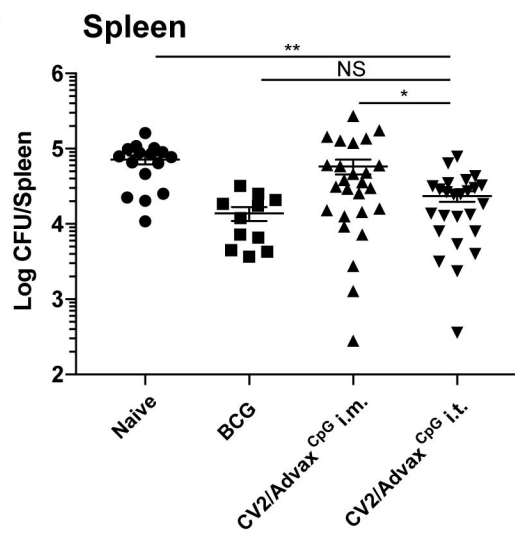

Figure 1, Counoupas *et al*

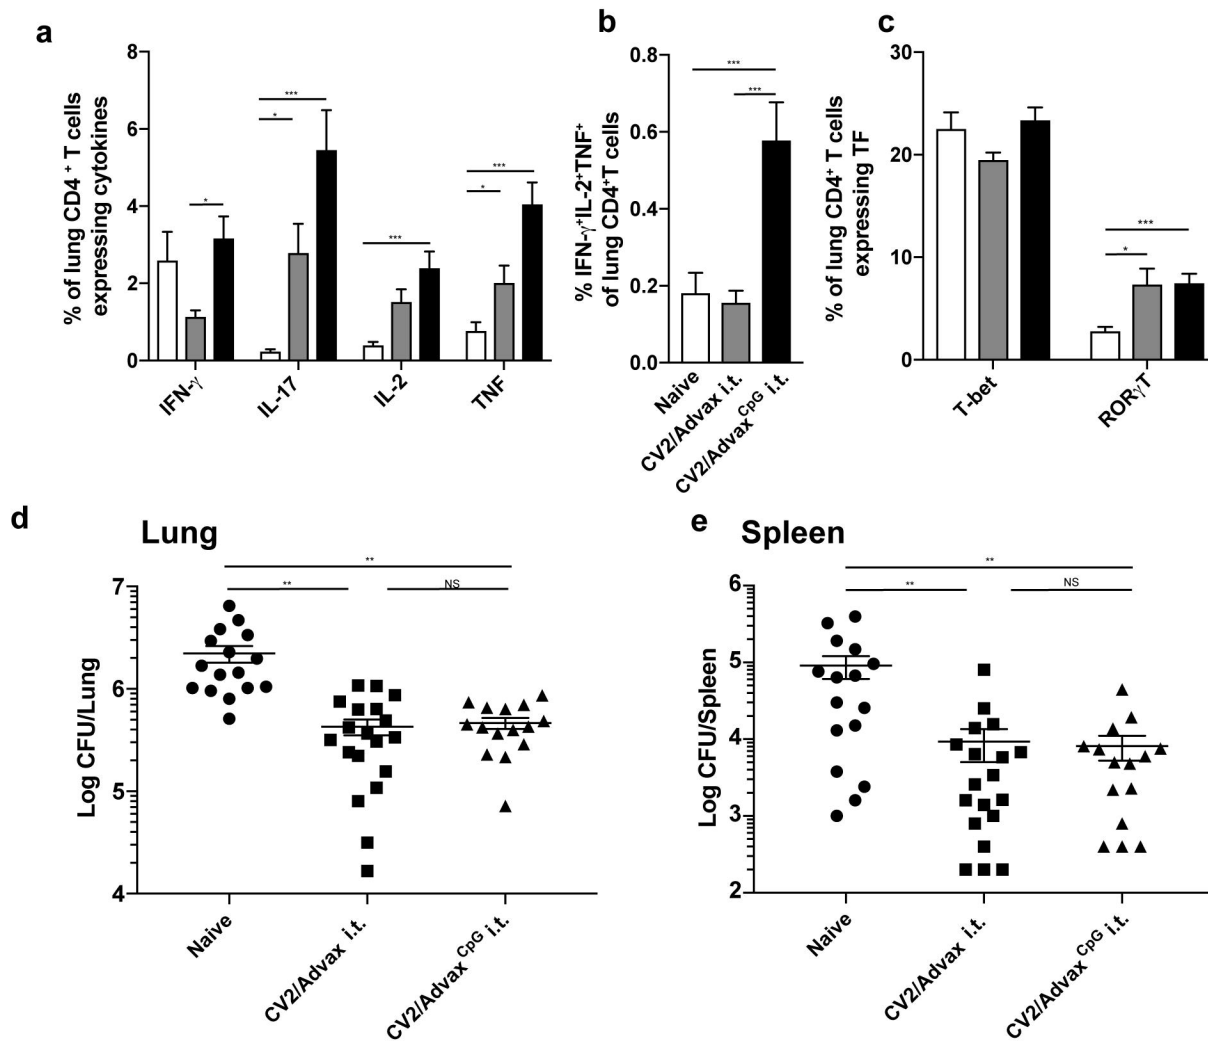

Figure 2, Counoupas *et al*

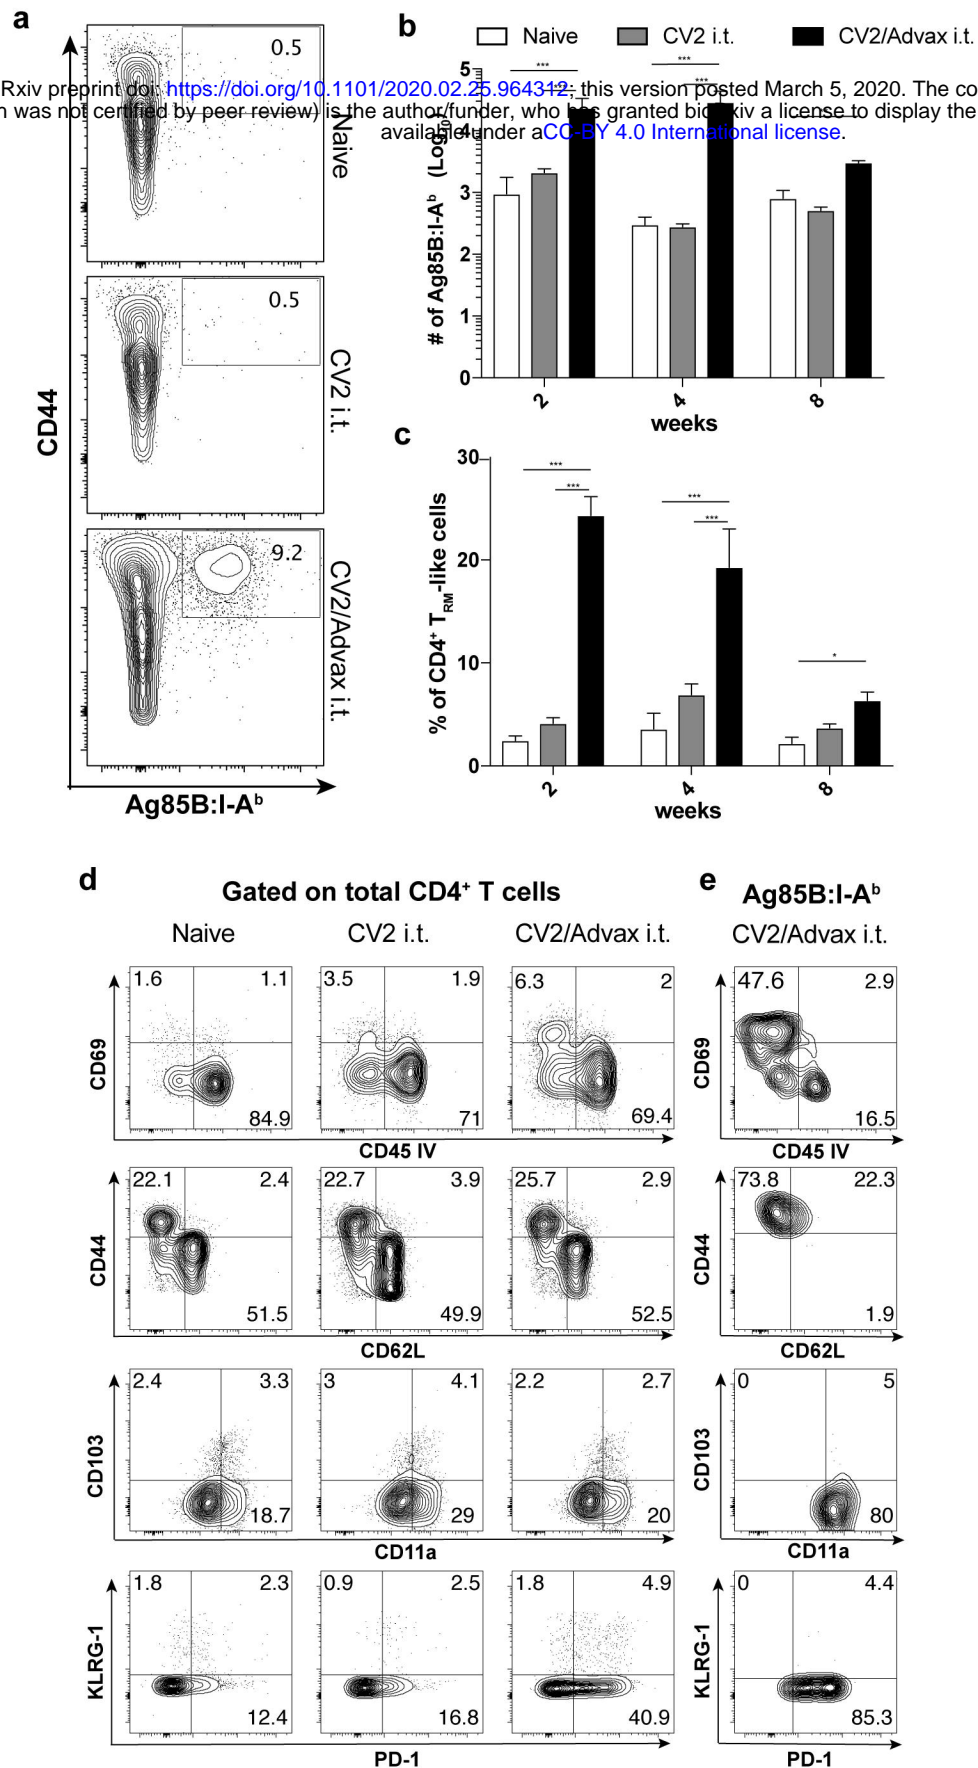

Figure 3, Counoupas *et al*

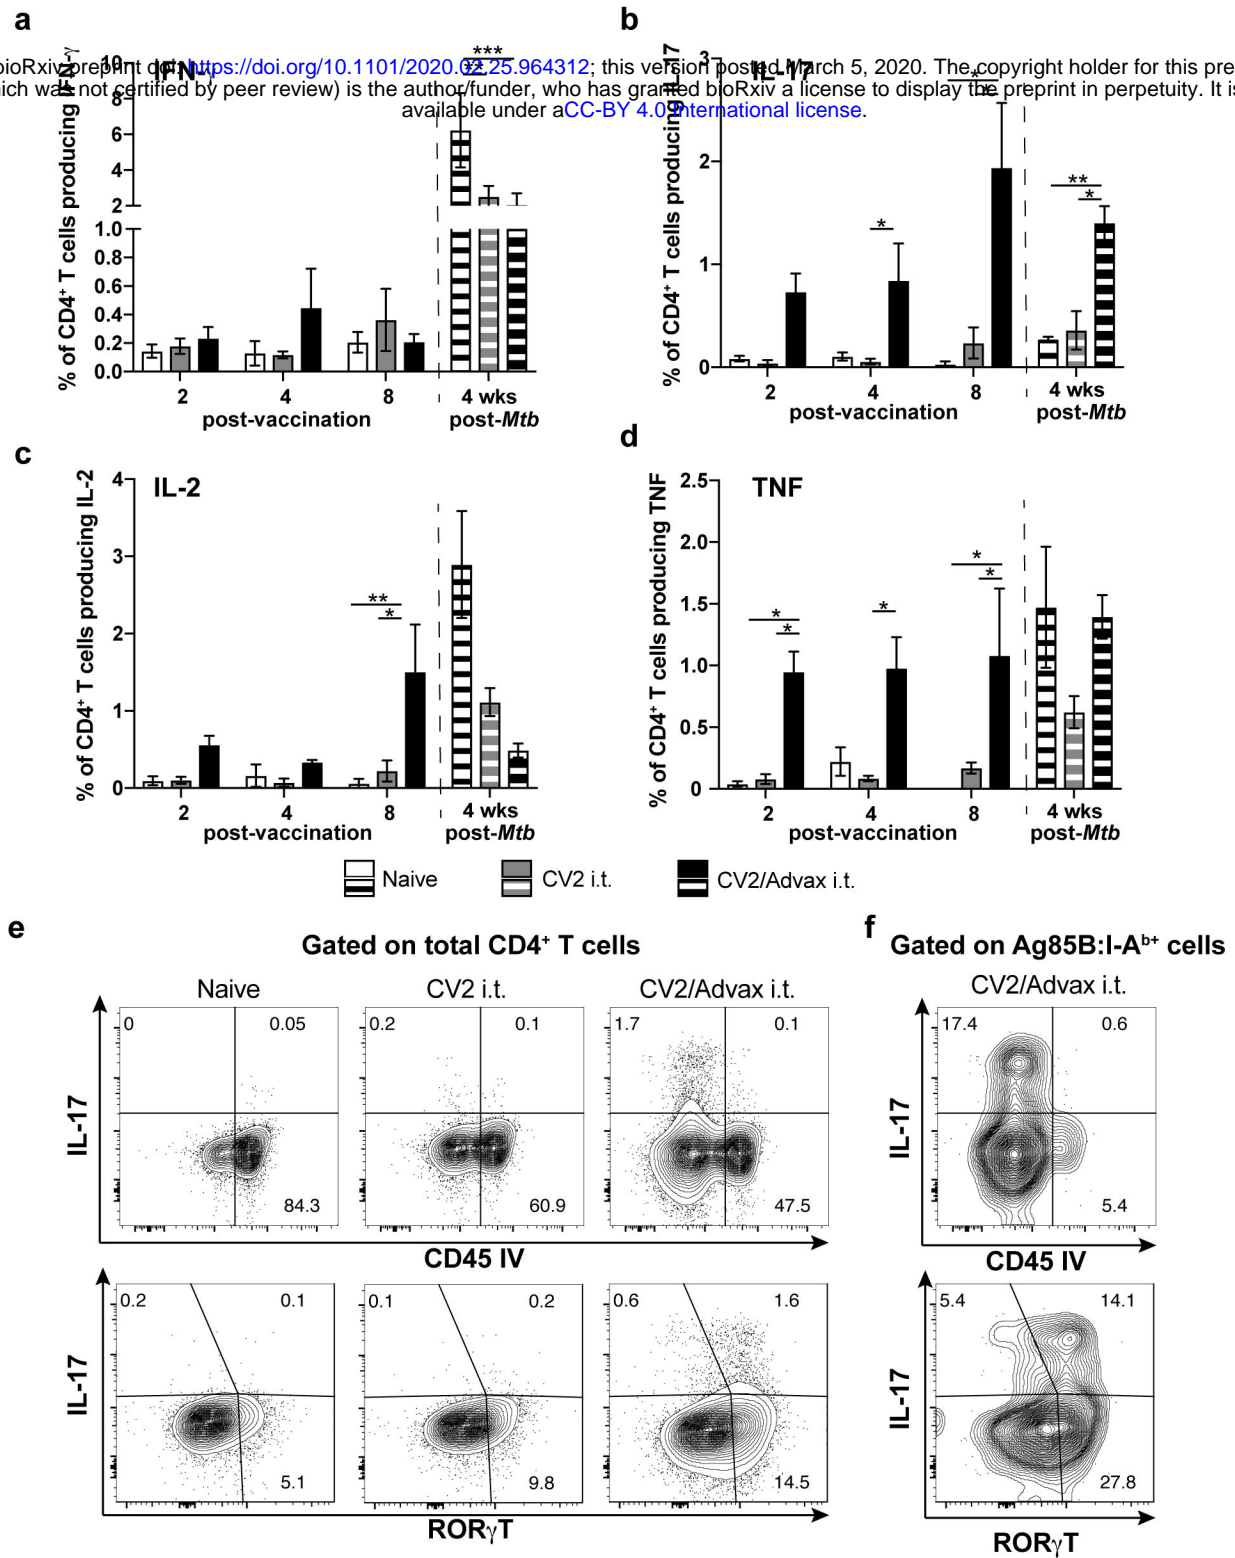

Figure 4, Counoupas *et al*

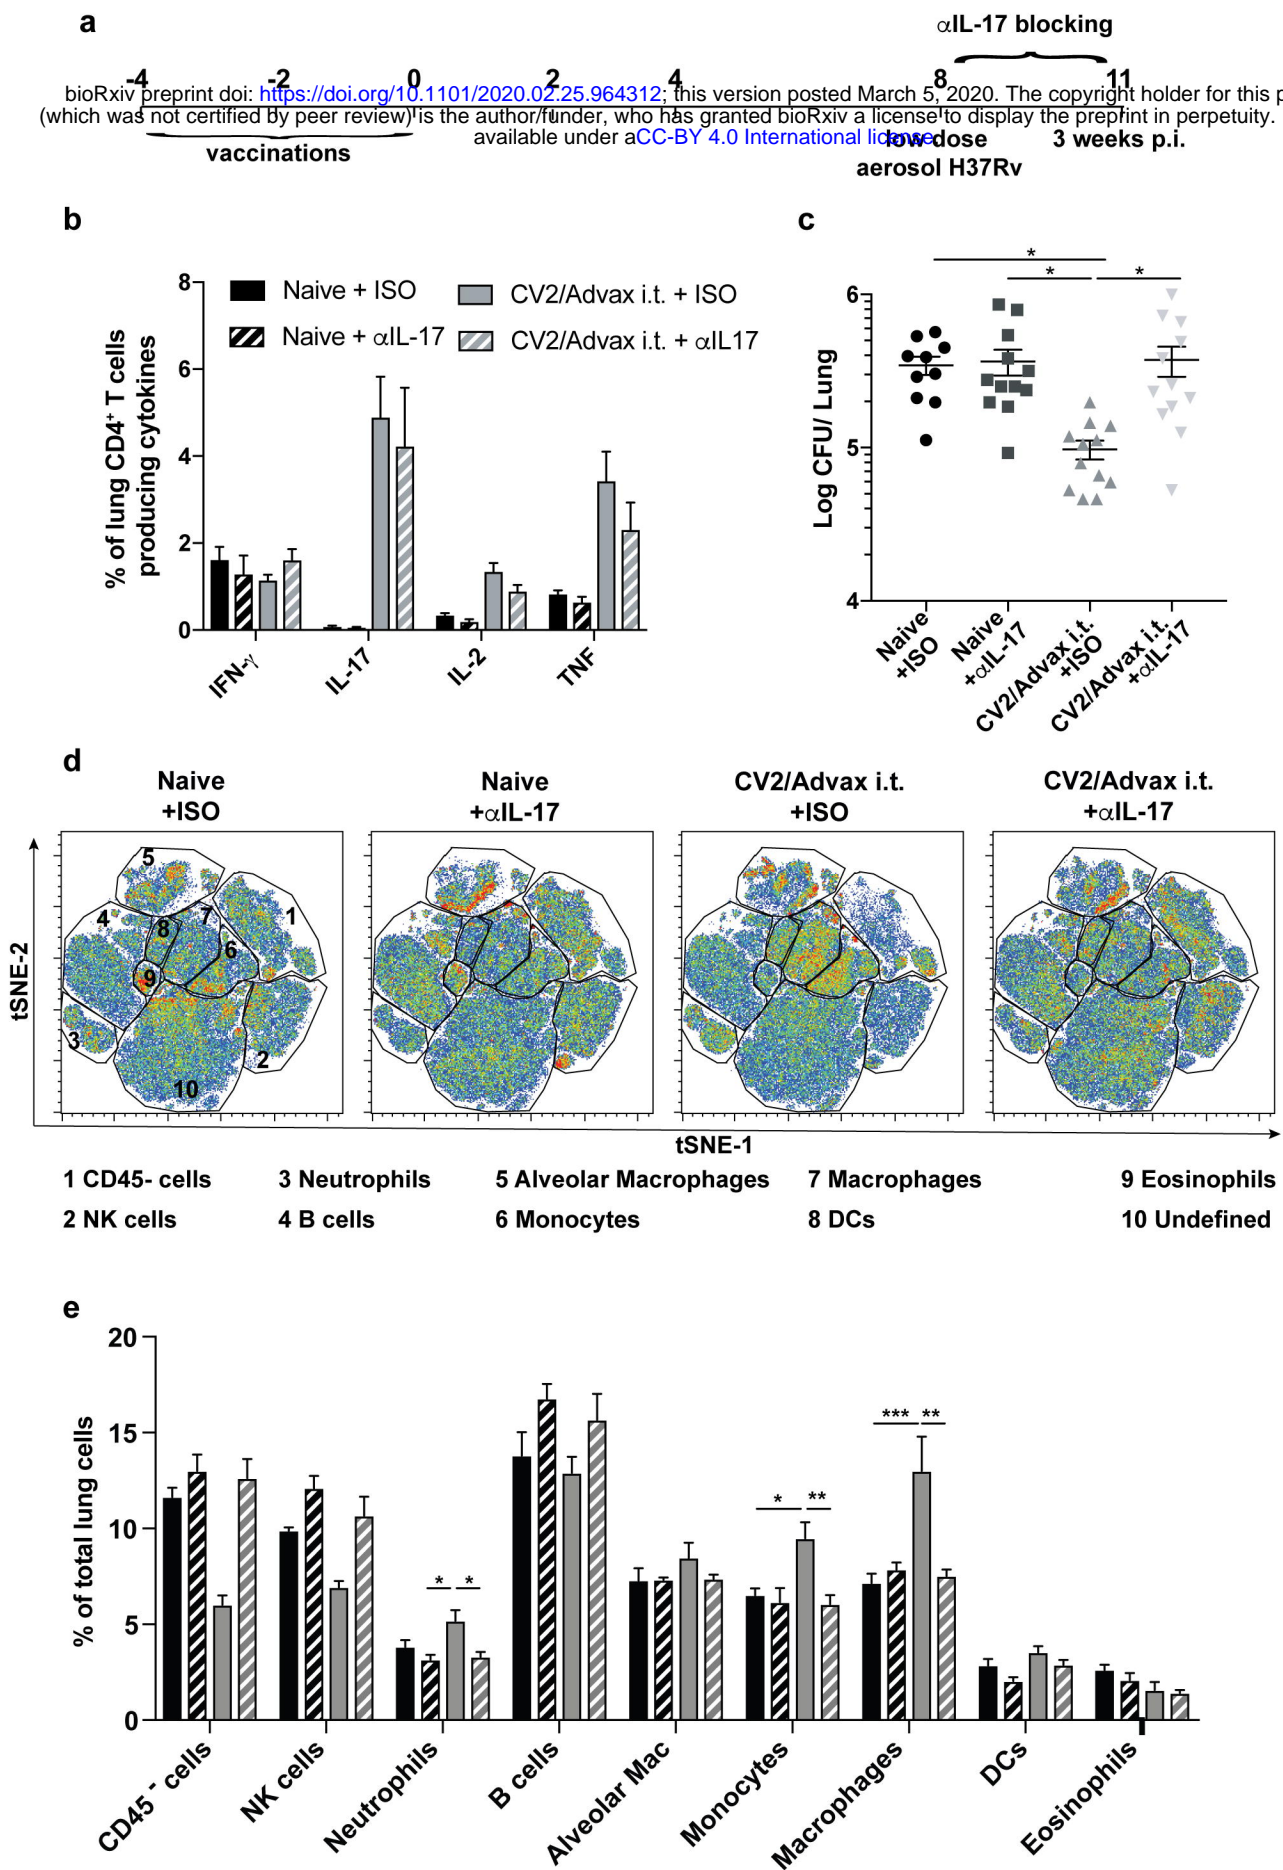

Figure 5, Counoupas *et al*

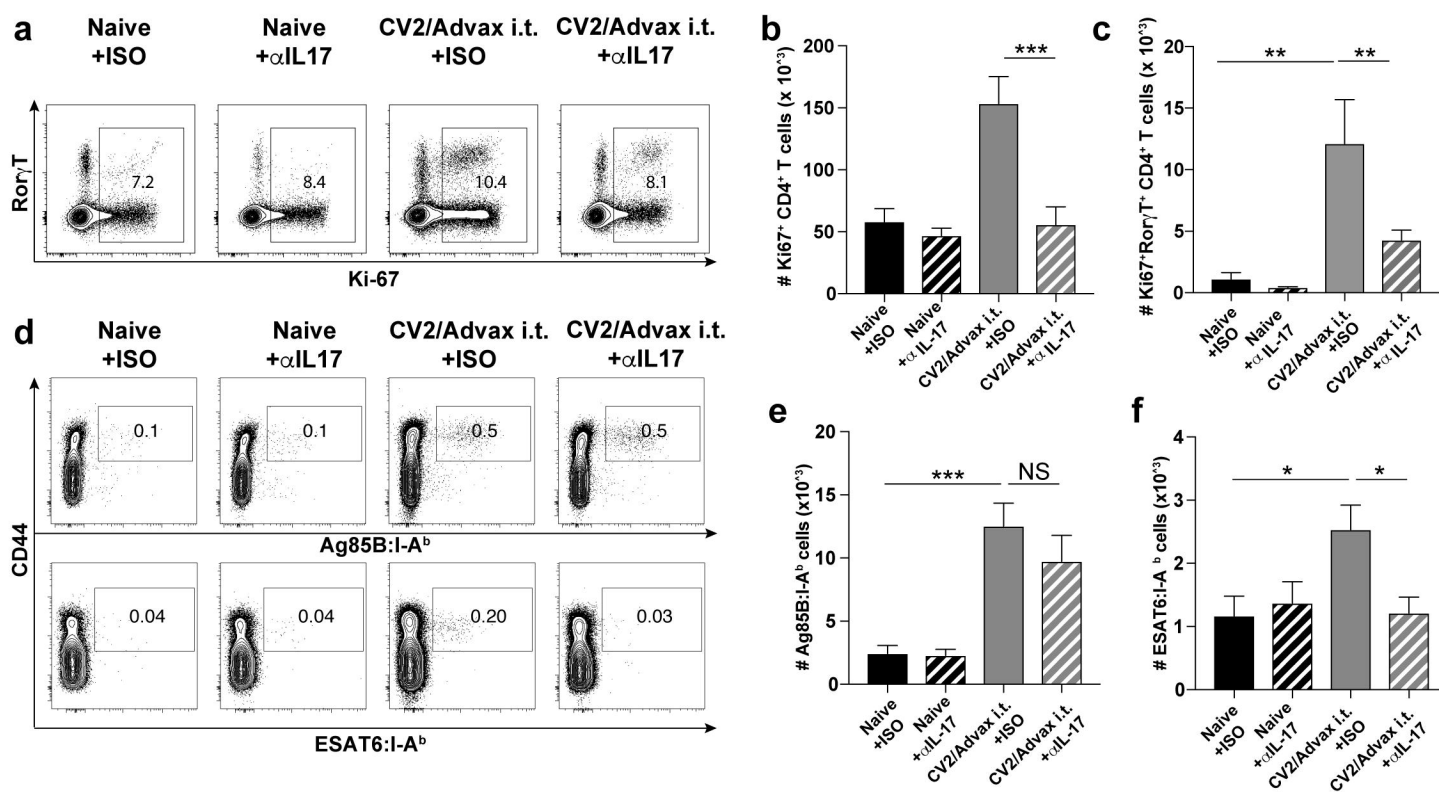

Figure 6, Counoupas *et al*

$T_{RM}$   
CD69<sup>+</sup>  
IV<sup>-</sup>  
CD44<sup>hi</sup>  
CD62L<sup>low</sup>  
CD11a<sup>+</sup>  
PD1<sup>hi</sup>  
KLRG1<sup>lo</sup>

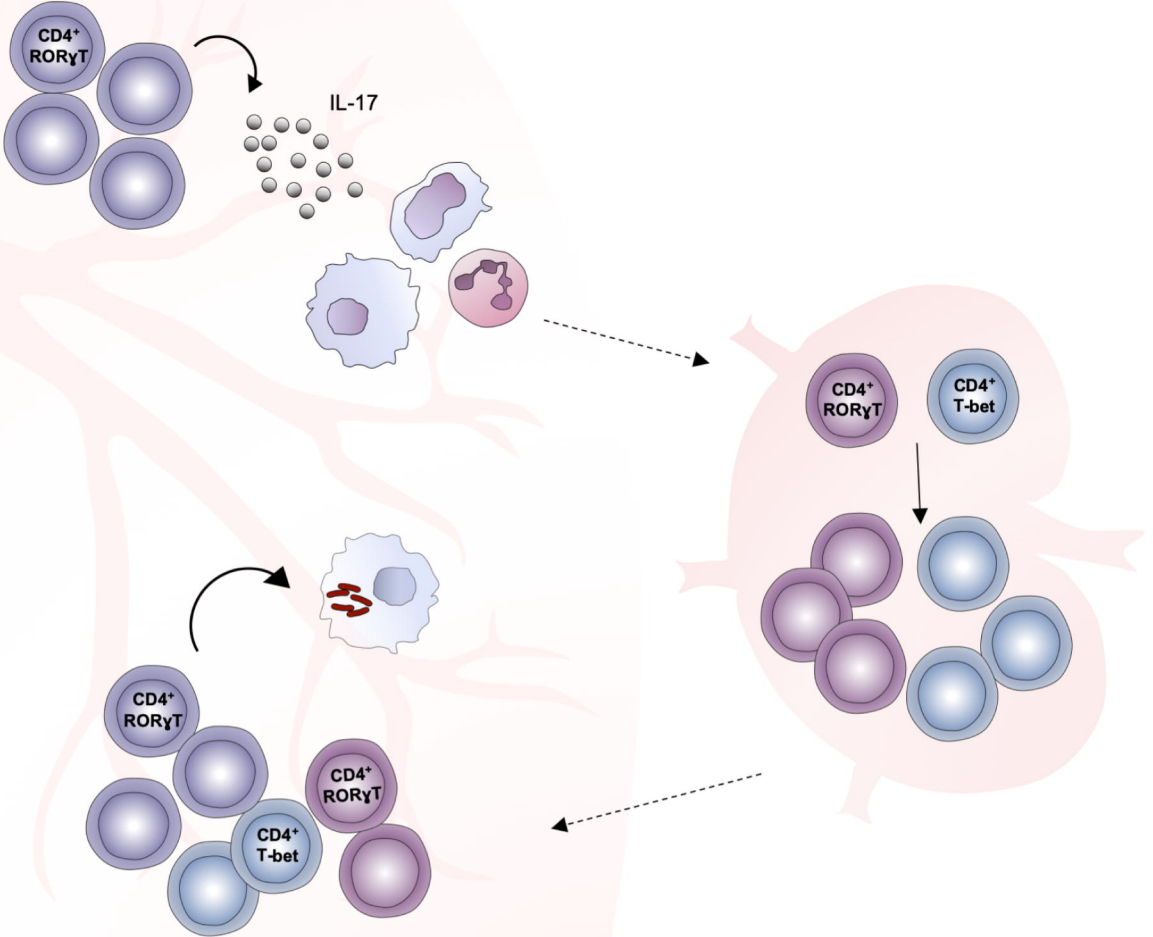

Figure 7, Counoupas *et al*
